# Supplementary material for: Global fitness landscapes of the Shine-Dalgarno sequence
Source: HighWire-hosted journal article supplement (doi:10.1101/gr.260182.119), 2020-05-01
Supplement: Supplemental_File_S1.xlsx [file Supplemental_File_S1.xlsx]

## Sheet: Sheet1
Supplemental File S1. Quality and quantity of fluorescence-activated cell sorting and deep sequencing.
Library	Reporter	Replicate	Rank	Fluorescence-activated cell sorting					Deep sequencing reads
				Range of fluorescence	Library proportion (%)	Cell amount	Sorting Puritya (%)		First round	Second round	Rank total	Library total
				(Log(Reporter))
FLfepB	GFP	1	1	< 0.398	5.52	552000	91.36		3861357		3861357	51382935
			2	0.398 0.808	22.07	2207000	96.28		8374332	2180461	10554793
			3	0.808−1.218	24.38	2440000	95.71		12725455		12725455
			4	1.218−1.628	21.66	2166000	94.8		10161908		10161908
			5	1.628−2.038	12.41	1241000	92.62		5860512		5860512
			6	2.038−2.448	8.5	850000	91.2		4743236		4743236
			7	2.448−2.858	4.05	405000	91.41		2903954		2903954
			8	> 2.858	0.82	82000	89.85		571720		571720
		2	1	< 0.556	5.23	523000	92.12		3438841		3438841	42682926
			2	0.556−0.938	21.31	2131000	96.58		9463597		9463597
			3	0.938−1.321	28.73	2873000	94.98		11996720		11996720
			4	1.321−1.703	23.34	2334000	90.93		6869356	1482730	8352086
			5	1.703−2.085	10.26	1026000	88.29		4484685		4484685
			6	20.85−2.468	6.98	700000	88.52		3491455		3491455
			7	2.468−2.85	2.92	292000	86.14		1127971		1127971
			8	> 2.850	0.78	78000	85.49		327571		327571
		3	1	< 0.477	4.84	484000	86.71		2635340		2635340	57275711
			2	0.477−0.675	8.19	820000	92.62		6852848		6852848
			3	0.675−0.874	9.33	933000	97.6		3425670	579175	4004845
			4	0.874−1.072	9.97	997000	93.67		3904067	1590675	5494742
			5	1.072−1.270	12.41	1241000	84.48		9548388		9548388
			6	1.270−1.469	13.97	1397000	85.41		3225858	4193781	7419639
			7	1.469−1.667	11.43	1143000	87.73		2079732	3719702	5799434
			8	1.667−1.866	7.98	800000	86.66		823829	3393878	4217707
			9	1.866−2.064	6.28	628000	87.36		256107	2975176	3231283
			10	2.064−2.263	6.33	633000	88.66		324954	2873374	3198328
			11	2.263−2.461	4.8	480000	92.15		1434830	1071169	2505999
			12	2.461−2.659	2.52	252000	90.56		135204	1166916	1302120
			13	2.659−2.858	1.6	160000	89.62		695504		695504
			14	2.858−3.056	0.69	70000	90.2		300185		300185
			15	>3.056	0.15	15000	87.6		69349		69349
FLarti	GFP	1	1	< 0.462	34.79	3479000	91.48		15381784		15381784	42666821
			2	0.462−0.878	48.35	4835000	92		16018771	2636124	18654895
			3	0.878−1.280	9.28	928000	80.56		4053640		4053640
			4	1.280−1.681	3.61	361000	87.88		2419078		2419078
			5	1.681−2.082	1.68	168000	90.54		758080		758080
			6	2.082−2.484	1.25	125000	96.34		843949		843949
			7	2.484−2.870	0.71	71000	90.4		407673		407673
			8	> 2.870	0.32	32000	82.68		147722		147722
		2	1	< 0.387	17.7	1770000	97.9		6010767		6010767	31684222
			2	0.387−0.803	49.55	4955000	99.84		15893196		15893196
			3	0.803−1.220	22.3	2230000	90.51		6682698		6682698
			4	1.220−1.636	6.19	620000	88.33		1709773	12547	1722320
			5	1.636−2.052	2.45	245000	95.15		713166		713166
			6	2.052−2.469	1.25	125000	94.68		416898		416898
			7	2.469−2.885	0.54	54000	93.47		181347		181347
			8	> 2.885	0.1	10000	90.71		63830		63830
		3	1	< 0.350	20.43	2043000	91.35		6186906		6186906	44180900
			2	0.350−0.771	46.44	4644000	98.75		22389353	987870	23377223
			3	0.771−1.191	22.14	2214000	88.75		10607798		10607798
			4	1.191−1.612	6.37	637000	91.29		2508384		2508384
			5	1.612−2.032	2.57	257000	97.59		873221		873221
			6	2.032−2.453	1.43	143000	97.17		406209		406209
			7	2.453−2.874	0.56	56000	96.02		179820		179820
			8	> 2.874	0.14	14000	94.1		41339		41339
FLdmsC	GFP	1	1	< 0.342	36.3	3630000	96.76		15444523		15444523	46275089
			2	0.342−0.762	47.1	4710000	97.45		4104515	15437220	19541735
			3	0.762−1.182	8.36	836000	86.96		6010606		6010606
			4	1.182−1.603	3.55	355000	90.41		1978327		1978327
			5	1.603−2.023	2.01	201000	94.39		843739	4833	848572
			6	2.023−2.443	1.34	134000	86.13		1444333		1444333
			7	2.443−2.863	0.9	90000	89.2		453440		453440
			8	> 2.863	0.44	44000	78.56		553553		553553
		2	1	< 0.562	20.63	2063000	95.05		5832662		5832662	26220529
			2	0.562−0.945	48.4	4840000	99.75		12181099		12181099
			3	0.945−1.327	19.56	1956000	78.81		5199194		5199194
			4	1.327−1.710	7.04	704000	84.11		1646061	156415	1802476
			5	1.710−2.092	2.6	260000	89.46		705064		705064
			6	2.092−2.475	1.26	126000	89.35		306294		306294
			7	2.475−2.857	0.44	44000	86.3		124105		124105
			8	> 2.857	0.11	11000	83.5		69635		69635
		3	1	< 0.508	14.88	1488000	91.35		5506213		5506213	36635100
			2	0.508−0.902	54.09	5410000	98.72		10277301	5066976	15344277
			3	0.902−1.297	22.34	2234000	88.75		11564295		11564295
			4	1.297−1.691	5.52	552000	91.29		2646992		2646992
			5	1.691−2.085	1.93	193000	97.59		811919		811919
			6	2.085−2.480	0.96	96000	97.17		475595		475595
			7	2.480−2.874	0.27	27000	96.02		168133		168133
			8	> 2.874	0.05	5000	94.1		117676		117676
FLarti-Y	YFP	1	1	<0.654	27.33	2733000	88.63				8946702	34790697
			2	0.654−1.012	41.36	4136000	98.02				15070164
			3	1.012−1.371	21.26	2126000	88.71				6929192
			4	1.371−1.729	7.22	722000	86.6				2602996
			5	1.729−2.087	2.01	201000	90.77				831302
			6	2.087−2.446	0.66	66000	92.46				289635
			7	2.446−2.804	0.14	14000	89.51				92399
			8	>2.804	0.02	2000	76.8				28307
aAll of these plasmids bear the RBSarti context upstream of the GFP gene.
bThe translation efficiency was quantified by in terms of cellular GFP or YFP expression. Data are reported as means and stand errors of three independent measurements based on 50,000 cells.
