# Supplementary material for: Global fitness landscapes of the Shine-Dalgarno sequence
Source: HighWire-hosted journal article supplement (doi:10.1101/gr.260182.119), 2020-05-01
Supplement: Supplemental_File_S6.zip [file File_Description.docx]

Supplemental File S6 - Scripts for data analysis

**Global fitness landscapes of the Shine-Dalgarno sequence**

**Syue-Ting Kuo#, Yuan-Ju Cheng, Ruey-Lin Jahn, Yi-Lan Chen, Yun-Ju Lee, Florian Hollfelder, Jin-Der Wen, Hsin-Hung David Chou***

**#**Scripts organizer. Email: [d08b21005@ntu.edu.tw](mailto:d08b21005@ntu.edu.tw)

*Corresponding author. Email: [chouhh@ntu.edu.tw](mailto:chouhh@ntu.edu.tw)

Scripts are organized into two major function categories:

1. Sort-seq data processing
2. Data analysis and visualization

**Category I. Sort-seq data processing**

Sequence hard-matching by the Linux grep program removes irrelevant or indel-containing reads from raw sequencing data. In-house Python scripts extract the 9-nt SD sequence from each read and count the occurrence of each genotype in each rank.

Three shell scripts and three python scripts (XXX indicates the library and experimental replicate):

script_XXX.sh

ReadCountTable_XXX.py

Input:

Raw sequencing data is available at NCBI (<https://www.ncbi.nlm.nih.gov/bioproject/PRJNA516114>, Accession: PRJNA516114).

Output:

One read count table for each library replicate.

**Category II. Data analysis and visualization**

Scripts for data analysis and plotting are listed in the following table. They are organized into six subsets/folders in terms of figure presentation. The function of each script corresponds to the description in the figure legend. README.docx files provide detailed information for script implementation.

| **Folder** | **File content** |
| --- | --- |
| Fig_1 | README.docx  fepb_RNAfold.csv  arti_RNAfold.csv  dmsc_RNAfold.csv  RNAsubopt_dG.csv  Fig1B_LibraryDistribution.py  Fig1B_Fold_analysis.py  Fig1B_Fold_plot.R  Fig1B_SDaSD_analysis.py  Fig1B_SDaSD_plot.R  Fig1C_LibraryCorrelation.py  util.py |
| Fig_2 | README.docx  Fig2A_analysis.py  Fig2A_plot.py  Fig2B_analysis.py  Fig2B_plot.py  util.py |
| Fig_3 | README.docx  Fig3A_NucleotideComposition.py  Fig3B_NucleotideContent.R  Fig3C_ConsensusMotif.py  util.py |
| Fig_5 | README.docx  fepb_SDR_union_count25_e1.csv  fepb_SDR_union_count25_e2.csv  fepb_SDR_union_count25_o1.csv  fepb_SDR_union_count25_o2.csv  arti_SDR_union_count25_e1.csv  arti_SDR_union_count25_e2.csv  arti_SDR_union_count25_o1.csv  arti_SDR_union_count25_o1.csv  dmsc_SDR_union_count25_e1.csv  dmsc_SDR_union_count25_e2.csv  dmsc_SDR_union_count25_o1.csv  dmsc_SDR_union_count25_o2.csv  Fig5A_SingleNucleotide.R  Fig5C_PairwiseEpistasis.R  Fig5E_LibraryCorrelation.py  util.py |
| Fig_6 | README.docx  Fig6_MutationEffect.R |
| Fig_Supplemental | README.docx  FigS7A_analysis.py  FigS7A_plot.R  FigS7B_analysis.py  FigS7B_plot.R  FigS7C_LibraryCorrelation3D.py  FigS14.py  FigS16-27_MutationEffectTotal.R  util.py |
