# Supplementary material for: Global fitness landscapes of the Shine-Dalgarno sequence
Source: HighWire-hosted journal article supplement (doi:10.1101/gr.260182.119), 2020-05-01
Supplement: Supplemental_File_S6.zip [file README.docx]

Scripts in this folder are for analyzing and plotting Fig. 5A, C, E. “util.py” is the package code for python scripts.

1. **Mean effects of single nucleotides on fitness**

Implement:
“Fig5A_SingleNucleotide.R”

Input:
“XXX_SDR_union_count25_e1.csv” (XXX indicates the library)

Output:
Fig. 5A

1. **Mean effects of pairwise epistasis on fitness**

Implement:
“Fig5C_PairwiseEpistasis.R”

Input:
“XXX_SDR_union_count25_e2.csv” (XXX indicates the library)

Output:
Fig. 5C

1. **Explanatory power of the RBS context, single nucleotides, and pairwise epistasis on fitness**

Implement:
“Fig5E_LibraryCorrelation.py”

Input:
“XXX_SDR_union_count25_o1.csv” (XXX indicates the library)
“XXX_SDR_union_count25_o2.csv” (XXX indicates the library)
Read count tables (Supplemental File S2, S3, S4)

Output:
Fig. 5E
