# Supplementary material for: Global fitness landscapes of the Shine-Dalgarno sequence
Source: HighWire-hosted journal article supplement (doi:10.1101/gr.260182.119), 2020-05-01
Supplement: Supplemental_File_S6.zip [file README.docx]

Scripts in this folder are for analyzing and plotting Fig. S7, S14, S16-27. “util.py” is the package code for python scripts.

1. **Relationship between the read count and the standard deviation of fitness of each genotype**

Implement:
“FigS7A_analysis.py”
“FigS7A_plot.R”

Input:
Read count tables (Supplemental File S2, S3, S4)

Output:
Fig. S7A

1. **Relationship between fitness and its coefficient of variation of each genotype**

Implement:
“FigS7B _analysis.py”
“FigS7B_plot.R”

Input:
Read count tables (Supplemental File S2, S3, S4)

Output:
Fig. S7B

1. **Correlation between the fitness of 3 genotypes characterized by three replicate experiments**

Implement:
“FigS7C_LibraryCorrelation3D.py”

Input:
Read count tables (Supplemental File S2, S3, S4)

Output:
Fig. S7C

1. **Relationship between the nucleotide content and the fitness of genotypes**

Implement:
“FigS14.py”

Input:
Read count tables (Supplemental File S2, S3, S4)

Output:
Fig. S14

1. **Fitness effects of mutations**

Implement:
“FigS16-27_MutationEffectTotal.R”

Input:
Read count tables (Supplemental File S2, S3, S4)

Output:
Fig. S16-27
