# Supplementary material for: Global fitness landscapes of the Shine-Dalgarno sequence
Source: HighWire-hosted journal article supplement (doi:10.1101/gr.260182.119), 2020-05-01
Supplement: Supplemental_File_S6.zip [file README.docx]

Scripts in this folder are for analyzing and plotting Fig. 3A, B, C. “util.py” is the package code for python scripts.

1. **Relationship between fitness and nucleotide composition**

Implement:
“Fig3A_NucleotideComposition.py”

Input:
Read count tables (Supplemental File S2, S3, S4)

Output:
Fig. 3A

1. **Relationship between the nucleotide content and fitness**

Implement:
“Fig3B_NucleotideContent.R”

Input:
Read count tables (Supplemental File S2, S3, S4)

Output:
Fig. 3B

1. **Influence of sequence motifs on fitness**

Implement:
“Fig3C_ConsensusMotif.py”

Input:
Read count tables (Supplemental File S2, S3, S4)

Output:
Fig. 3C
