# Supplementary material for: Global fitness landscapes of the Shine-Dalgarno sequence
Source: HighWire-hosted journal article supplement (doi:10.1101/gr.260182.119), 2020-05-01
Supplement: Supplemental_File_S6.zip [file README.docx]

Scripts in this folder are for analyzing and plotting Fig. 6.

1. **Relationship between background fitness and mutational effects**

Implement:
“Fig6_MutationEffect.R”

Input:
Read count tables (Supplemental File S2, S3, S4)

Output:
Fig. 6
