# Supplementary material for: Global fitness landscapes of the Shine-Dalgarno sequence
Source: HighWire-hosted journal article supplement (doi:10.1101/gr.260182.119), 2020-05-01
Supplement: Supplemental_File_S6.zip [file README.docx]

Scripts in this folder are for analyzing and plotting Fig. 2A, B. “util.py” is the package code for python scripts.

1. **Correlations between the fitness of a genotype and the individual fitness or the mean fitness of its 27 single-mutation neighbors**

Implement:
“Fig2A_analysis.py”
“Fig2A_ plot.py”

Input:
Read count tables (Supplemental File S2, S3, S4)

Output:
Fig. 2A

1. **Relationship between the fitness of a genotype and the amount of beneficial, neutral, and deleterious mutations in this genetic background**

Implement:
“Fig2B_analysis.py”
“Fig2B_plot.R”

Input:
Read count tables (Supplemental File S2, S3, S4)

Output:
Fig. 2B
