# Supplementary material for: Global fitness landscapes of the Shine-Dalgarno sequence
Source: HighWire-hosted journal article supplement (doi:10.1101/gr.260182.119), 2020-05-01
Supplement: Supplemental_File_S6.zip [file README.docx]

Scripts in this folder are for analyzing and plotting Fig. 1B, C, D. “util.py” is the package code for python scripts.

1. **Distribution of the fitness of genotypes**

Implement:
“Fig1B_LibraryDistribution.py”

Input:
Read count tables (Supplemental File S2, S3, S4)

Output:
Fig. 1B (upper panels)

1. **Correlation with the SD:aSD base-pairing energy**

Implement:
“Fig1B_SDaSD_analysis.py”
“Fig1B_SDaSD_plot.R”

Input:
“XXX_RNAfold.csv” (XXX indicates the library)
Read count tables (Supplemental File S2, S3, S4)

Output:
Fig. 1B (middle panels)

1. **Correlation with the local mRNA folding energy**

Implement:
“Fig1B_Fold_analysis.py”
“Fig1B_Fold_plot.R”

Input:
“RNAsubopt_dG.csv”
Read count tables (Supplemental File S2, S3, S4)

Output:
Fig. 1B (lower panels)

1. **Phenotypic correlation of SD genotypes between fitness landscapes**

Implement:
“Fig1C_LibraryCorrelation.py”

Input:
Read count tables (Supplemental File S2, S3, S4)

Output:
Fig. 1C
