# Supplementary material for: Global fitness landscapes of the Shine-Dalgarno sequence
Source: HighWire-hosted journal article supplement (doi:10.1101/gr.260182.119), 2020-05-01
Supplement: Supplemental_Material_20200413.docx [file Supplemental_Material_20200413.docx]

Supplemental Material

**Global fitness landscapes of the Shine-Dalgarno sequence**

**Syue-Ting Kuo, Yuan-Ju Cheng, Ruey-Lin Jahn, Yi-Lan Chen, Yun-Ju Lee, Florian Hollfelder, Jin-Der Wen, Hsin-Hung David Chou***

*Corresponding author. Email: [chouhh@ntu.edu.tw](mailto:chouhh@ntu.edu.tw)

**This PDF file includes:**

Supplemental Methods

Supplemental Text

Supplemental Figures S1 to S32

Supplemental Tables S1 to S4

Captions for Supplemental Files S1 to S6

**Other Supplemental Material for this manuscript include the following:**

Supplemental File S1. Quality and quantity of fluorescence-activated cell sorting and

deep sequencing.

Supplemental File S2. Fitness of SD genotypes in FL*fepB*.

Supplemental File S3. Fitness of SD genotypes in FL*arti*.

Supplemental File S4. Fitness of SD genotypes in FL*dmsC*.

Supplemental File S5. Fitness of SD genotypes in FL*arti*-Y.

Supplemental File S6. Scripts for data analysis.

**Supplemental Methods**

**Growth media**

Luria-Bertani (LB) broth consisted of 10 g of NaCl (Fisher Scientific), 10 g of tryptone (Becton Dickinson) and 5 g of yeast extract (Becton Dickinson) in one liter of deionized water. LBK medium, LB broth supplemented with filter-sterilized kanamycin sulfate (50 mg/l, Thermo Fisher Scientific), was used in regular cell culture. LBKG medium, LBK medium supplemented with filter-sterilized glucose (10 g/l, Sigma-Aldrich) to enhance GFP expression, was applied to culturing cells for growth assays and cell sorting.

**Plasmid construction**

Primers used for inverse PCR were subjected to 5’ phosphorylation by T4 polynucleotide kinase (NEB) prior to PCR reactions. All of the PCR reactions involved in plasmid construction were carried out by Phusion DNA polymerase following the manufacturer’s instruction. Four template plasmids (Supplemental Fig. S1), pYC08, pYC09, pYC20, and pHC199v, for founding the three GFP-based and one YFP-based SD libraries (FL*fepB*, FL*arti*, FL*dmsC* and FL*arti*-Y, respectively) were built through multiple steps. First, a 3.4-kb fragment of pUA139 containing a kanamycin resistance marker and the pSC101 replication origin was PCR amplified by primer pair UA139r/UA139f and digested by *ApaI* and *SalI* (Zaslaver et al. 2006). Part of this product was self-ligated by the T4 DNA ligase to create pHC162s, a plasmid devoid of fluorescent protein reporters; the remaining was ligated with an 1-kb *ApaI*/*SalI* digested fragment containing the *PtacA-*RBS*fae-venus-*t*T7* cassette of pHC161v PCR amplified by primer pair MV1/MV2 to generate pHC162v (Chou et al. 2015). The P*tacA* promoter of pHC162v was then replaced by the proD promoter (PproD) along with a 55-nt mRNA leader sequence designed to insulate upstream translation activity by forming two stable RNA hairpins (Davis et al. 2011). The PproD-leader fragment, produced by annealing primer pair proDf/proDr, was ligated with the 4.4-kb *SalI/XbaI* digested pHC162v backbone to generate pHC163v. RBS*fae* on pHC163v was modified by inverse PCR using primer pair WH4f/WH4r. Self-ligation of this PCR product created pHC165v. To raise the plasmid copy number of pHC165v, a nonsynonymous substitution (E93K) was introduced into the *repA* gene of the pSC101 replication origin by inverse PCR using primer RepA93kf/RepA93r followed by self-ligation to create pHC172v (Peterson and Phillips 2008). To raise the transcription activity, PproD on pHC172v was replaced by the PA1 promoter of phage T7 (Brunner and Bujard 1987). The PA1 fragment, produced by annealing primer pair PA1f/PA1r, was ligated with the 4.4-kb *MluI/AseI* digested pHC172v backbone to generate pHC174v1. pHC174v2, a variant of pHC174v1 bearing a mutated PA1 promoter (termed PA1v2), was also isolated since it provided sufficient YFP expression without inhibiting cell growth. Relative to PA1, PA1v2 promoter showed three-fold reduction in YFP expression due to a spontaneous deletion (∆C) in its spacer region. To insert the 30-nt RBS*arti* bearing the canonical 9-nt SD sequence (5’-UAAGGAGGU-3’), a 0.9-kb fragment of pHC174v2 was PCR amplified using primer pair VSSR12-SD9/UA66p4, digested by *XbaI* and *XhoI*, and ligated with the 3.6-kb *XbaI/XhoI* digested pHC174v2 backbone, resulting in pHC199v. pHC199v served as the template plasmid of the FL*arti*-Y SD library. In addition, two pHC199v derivatives, pHC198v and pHC202v, bearing SD of weaker translation efficiencies (5’-AUAGGAGGA -3’ and 5’-AUAGGAGCA -3’) were created by similar procedures except replacing primer VSSR12-SD9 by VSSR12-SD6 and VSSR-SD5, respectively. To replace YFP of pHC199v by GFPmut2, the 0.7-kb *gfpmut2* gene of pUA139 was PCR amplified using primer pair GFPmut2f/GFPmut2r, digested by *XbaI* and *XhoI*, and ligated with the 3.6-kb *XbaI/XhoI* digested pHC199v backbone to create pHC200. As excessive GFP expression of pHC200 severely inhibited growth of *E. coli*, several steps were taken to fine-tune its GFP expression. First, its PA1v2 promoter was switched back to PproD. This was achieved by ligating a 0.7-kb *XbaI/XhoI* digested fragment of pHC200 with the 3.6-kb *XbaI/XhoI* digested pHC172v backbone, resulting in pYC01. To elevate the GC content of the 5’ *gfpmut2* gene without altering the protein sequence, pYC01 was amplified by inverse PCR using primer pair YC04p1/YC04p2 followed by self-ligation to generate pYC04. pYC05 was generated by ligating a 0.9-kb *HindIII/XbaI* digested fragment of pYC04 with the 3.5-kb *HindIII/XbaI* digested pHC172v backbone. pYC06 was constructed by ligating a 1.0-kb *BamHI/HindIII* digested fragment of pYC04 with the 3.4-kb *BamHI/HindIII* digested pHC162v backbone. pYC08, the template plasmid of the FL*arti* SD library, was built by ligating a 0.9-kb *BamHI/XhoI* digested fragment of pYC05 with the 3.5-kb *BamHI/XhoI* digested pYC06 backbone. RBS*arti* on pYC08 was replaced by RBS*fepB* and RBS*dmsC* to generate pYC09 and pYC20, the template plasmids of the FL*fepB* and FL*dmsC* SD libraries, respectively. These modifications were achieved by inverse PCR to amplify pYC08 using primer pairs YC09p1/YC09p2 and YC12p1/YC12p2 followed by self-ligation. pTK03, pYC08 derivative bearing the reverse aSD sequence (5’-AUUCCUCCA-3’) was constructed by inverse PCR using primer pair TK03p1/YC21p1 followed by self-ligation. pTK03 served as the negative control plasmid of GFP expression as its SD sequence forbade 16S rRNA-mRNA base pairing. pTK05, a FL*arti* SD genotype used as a spike-in control for cell sorting, was generated by inverse PCR of pYC08 using primer pair TK05p1/YC19p2 followed by self-ligation. pTK06, a FL*arti*-Y genotype used as a spike-in control for cell sorting, was generated by inverse PCR of pYC08 using primer pair YL13p1/TK06p2 followed by self-ligation. pYC39, pYC40, and pYC41 bearing the nine-guanine SD genotype (5’-GGGGGGGGG-3’) under the RBS*arti*, RBS*fepB*, and RBS*dmsC* contexts, were constructed by inverse PCR of pYC08, pYC20, and pYC09 using primer pairs YC23p1/YC39p1, YC24p1/YC40p1, and YC26p1/YC41p1, respectively, followed by self-ligation. pYC29, pYC31, pTK39, pTK40, pTK41, pTK42, and pTK43 bearing poly(U) SD genotypes in RBS*fepB*, were constructed by inverse PCR of pYC20 using primer pairs YC24p1/YC29p1, YC30p1/YC29p1, YC24p1/TK39p1, YC24p1/TK40p1, YC24p1/TK41p1, YC24p1/TK42p1, and YC24p1/TK43p1, respectively, followed by self-ligation. pYC38, a FL*arti* genotype used in quantifying the association between the mRNA level and GFP fluorescence of the FL*arti* genotypes, was generated by inverse PCR of pYC08 using primer pair YC23p1/YC38p1 followed by self-ligation. pYC28, pYC30, pYC34, pYC36, pYC42, and pYC43, six FL*fepB* genotypes used in quantifying the mRNA-GFP association, were generated by inverse PCR of pYC20 using primer pairs YC28p1/YC24p1, YC30p1/YC28p1, YC24p1/YC34p1, YC24p1/YC36p1, YC24p1/YC42p1, and YC24p1/YC43p1, respectively, followed by self-ligation. pYC32, pYC33, pYC37, pYC44, pYC45, and pYC46, six FL*dmsC* genotypes used in quantifying the mRNA-GFP association, were generated by inverse PCR of pYC09 using primer pairs YC26p1/YC32p1, YC26p1/YC33p1, YC26p1/YC37p1, YC26p1/YC44p1, YC26p1/YC45p1, and YC26p1/YC46p1, respectively, followed by self-ligation. DNA sequences in the reporter gene cassettes of the aforementioned plasmids were validated by Sanger sequencing using primer UA66p5.

**Measurement of cell growth and GFP/YFP expression**

Population growth and GFP/YFP expression of *E. coli* were monitored by a TECAN Spark 10M plate reader. Each experiment began with the inoculation of 1 μl of frozen stocks into 200 μl LBKG medium and incubated overnight at 37°C and 225 rpm. Subsequently, 1 μl of this preculture was transferred to 200 μl of LBKG medium. For each strain, three replicate cultures were grown inside the plate reader at 37°C and 216 rpm. Their optical densities (OD) at 600 nm, GFP fluorescence (excitation/emission: 488 ± 10 nm / 528 ± 10 nm), or YFP fluorescence (excitation/emission: 495 ± 10 nm / 535 ± 10 nm) were measured every 20 min. Cellular GFP/YFP expression was computed as GFP/YFP fluorescence divided by OD readouts.

Single-cell fluorescence was quantified by a BD FACSJazz cell sorter. Each experiment began with the inoculation of 1 μl of frozen stocks into 2 ml of LBKG media incubated overnight at 37°C and 225 rpm. Next day, 5 μl of this preculture was transferred to 2 ml LBKG medium and incubated under identical conditions. When OD reached 0.55-0.65 at 1 cm path length, 100 μl of this culture was mixed thoroughly with 900 μl of pre-chilled PBS and was stored on ice. For each strain, the cell sorter quantified GFP (excitation/emission: 488 nm / 513 ± 8.5 nm) and YFP fluorescence (excitation/emission: 488 nm / 542 ± 13.5 nm) of 50,000 to 200,000 cells in three replicate cultures.

**Single-molecule measurement of the RBS-ribosome binding**

The 30S subunit of *E. coli* MRE600 and RNA constructs containing synthetic RBS were prepared by procedures described previously (Marshall et al. 2008; Chen et al. 2017). Cells were grown to OD 0.55-0.65, pelleted, and stored at -80°C. Cell pellets were lysed in the 10 mM MgCl2 buffer. The cell lysate was subjected to a 37.7% sucrose cushion and centrifuged at 33,800 rpm for 18 hr to pellet down the 70S ribosomes. The pellet was resuspended in the 1 mM Mg(OAc)2 buffer to separate the 50S and 30S subunits. RNA constructs were synthesized by the MEGAscript SP6 Transcription Kit (Ambion) and purified by the MEGAclear Kit (Ambion). Two oligonucleotides, 5’ handle (ssDNA) and 3’ handle (ssRNA), were chemically synthesized (Supplemental Table S1). The 5’ handle contained a biotin tag and a Cy5 dye. The 3’ handle contained a Cy3 dye. RNA constructs were annealed with both handles, and the Cy3/Cy5 dye pair worked as the reporter of fluorescence resonance energy transfer (FRET) due to RNA folding. The annealed construct was diluted in the TLB buffer and immobilized on a polyethylene glycol-passivated slide chamber. Image recording was set at 50 ms/frame under illumination of the 532-nm green laser. Three replicate measurements, each consisting of the FRET time traces of 600-1100 molecules, were performed for a RNA construct at 25°C with or without 0.2 μM of the 30S subunit. FRET time traces were fitted by an empirical Bayes method to identify the unbound state and the 30S-bound state (Supplemental Fig. S15) (van de Meent et al. 2014). The apparent association rate (*kon*) and dissociation rate (*koff*) were computed as the reciprocals of the mean dwell time from the fitted traces in the unbound state and the 30S-bound state, respectively. The association constant (Ka) was calculated as *kon* divided by *koff*.

**Protein extraction and dot blot experiments**

*E. coli* MG1655 bearing pTK03, pYC08, pLK170110v12, pLK17011044, pLK170110v59, and pLK170110v71 (Supplemental Table S2) and the GFP-negative strain EK222 were grown in 500 ml of LBKG medium at 37°C and 225 rpm. When OD reached 0.55-0.65, cells were harvested by centrifugation at 9,000 g for 10 min at 4°C. Cells were washed with 100 ml of PBS, suspended in 8 ml of the Tris-HCl buffer (pH 8.0) containing 1% of the Protease Inhibitor Cocktail Set V (Merck Millipore, v/v) and were disrupted by sonication for 30 min at 4°C using a Misonix Sonicator 3000. Cell debris was removed by centrifugation at 17,000 g for 20 min at 4°C. The remaining cell extract was mixed with 20% glycerol (v/v) and stored at −80°C. Three replicates of protein extraction were performed. Cellular protein concentrations were quantified by Protein Assay Dye Reagent Concentrate (Bio-Rad). The amount of GFP in the cell extract was measured by dot blot experiments (Li et al. 2012). Each cell extract (containing 1 μg of total proteins) and 0-20 ng of the pure GFP protein (Abcam) was spotted on an Immobilon-PSQ PVDF membrane (Merk Millipore). The membrane was reacted with the Immobilon Western Chemiluminescent HRP Substrate (Merck Millipore), and its luminescence intensity was recorded by a Wealtec KETA CL Imaging System and quantified by ImageJ2 (Rueden et al. 2017). Linear regression of the protein quantity and the luminance intensity of pure GFP proteins was performed to generate a standard curve. After subtracting the luminescence of EK222 (i.e. the background signal of total cellular proteins), the luminescence intensity of each cell extract was converted to the absolute GFP amount based on the standard curve.

**RNA extraction and quantitative PCR**

*E. coli* MG1655 bearing nine FL*fepB* (pYC09, pTK34, pLK170505v1, pYC28, pYC29, pYC30, pYC31, pYC36, pYC40), eleven FL*arti* (pYC08, pYK03, pLK170110v6, pLK170110v12, pLK170110v20, pLK170110v22, pLK170110v34, pLK170110v44, pLK170110v49, pLK170110v69, pLK170110v71), and four FL*dmsC* genotypes (pYC44, pYC46, pLK170518v2, pLK170518v4) was grown in 10 ml of LBKG medium at 37°C and 225 rpm (Supplemental Table S2). When OD reached 0.55-0.65, cells were harvested by adding 1/10th the volume of a growth-stopping solution (5% Tris-EDTA saturated phenol and 95% ethanol) followed by centrifugation at 9000 g for 5 min at 4°C. Total RNA was extracted using the RNeasy Mini Kit (QIAGEN), followed by removal of residual genomic DNA with the Turbo DNA-free Kit (Thermo Fisher Scientific). cDNA was synthesized by the High-Capacity cDNA Reverse Transcription Kit (Thermo Fisher Scientific). For each genotype, mRNA extraction and cDNA synthesis were performed twice independently. The primer pairs for detecting the *gfp* and *gapA* transcripts were YLEp5/YLEp6 and YLEp7/YLEp8, respectively (Supplemental Table S1). Real-time PCR of each cDNA sample was performed in two replicates with the iQ SYBR Green Supermix (Bio-Rad) on a CFX Connect Real-Time PCR System (Bio-Rad). For each cDNA sample, two replicates of real-time PCR were performed. The *gapA* gene was chosen as the reference for data normalization. Changes in gene expression were calculated by an established method (Livak and Schmittgen 2001; Chou et al. 2014).

**Statistics**

Scripts for data analysis were described in Supplemental File S6. Calculation of data correlation (Pearson’s r) and two-tailed t-test for the significance of correlation were implemented by the pearsonr function in the Python SciPy library (Sanner 1999). The two-tailed permutation test for the significance of correlation involved two steps and was implemented by a Python script. First, the genotypes and phenotypes in each of the FL*fepB*, FL*arti*, and FL*dmsC* libraries (Supplemental File S2-4) were randomly paired to generate a permutated dataset, and its genotype-phenotype correlation was calculated by the Python pearsonr function. This procedure was repeated 10,000 times to produce a probability distribution of the Pearson’s r. Based on this distribution, the *P* value of the permutation test was reported as the proportion of r larger in magnitude than the r value under consideration.

**Supplemental Text**

**Optimization of experimental systems for robust signal outputs**

In order to perform high-throughput SD G-P mapping, we designed our experimental system with the aim of maximizing the signal outputs while minimizing the measurement noise and growth inhibition of *E. coli*. We generated SD genotypes on a copy-controlled low-copy plasmid backbone instead of inserting them into the chromosome because plasmid-based mutagenesis conferred a larger library size (Peterson and Phillips 2008), allowing us to detect up to 99.91% of all possible 262,144 genotypes in a single sort-seq experiment (Supplemental Fig. S6). A prior study yields similar conclusions by comparing protein translation from the plasmid and the *E. coli* chromosome (Bonde et al. 2016), suggesting the G-P associations reported by our system generally applicable. Moreover, we employed just single GFP or YFP genes as the reporter for SD-driven translation, unlike a prior study of gene expression where an additional red fluorescent protein (RFP) gene expressed at a constant level was used to calibrate single-cell variation on protein translation because of the following considerations (Kosuri et al. 2013): (1) RFP expression competed with GFP expression for the translation machinery and the energy resource − at high GFP expression levels, the RFP expression dropped and the actual GFP expression was lower than expected. (2) Due to the competition between RFP and GFP expression, more noise was introduced by the ratiometric measurement. (3) RFP expression along with strong GFP expression slowed down cell growth due to the protein burden. (4) Adding a RFP gene to the plasmid may reduce its transformation efficiency due to an increase in the construct size.

We built several plasmid constructs with different combinations of promoters and replication origins (Supplemental Table S2) and tested their influence on the growth of *E. coli* MG1655. We found that template plasmids (i.e. pYC08, pYC09, pYC20) bearing the PA1v2 promoter and the pSC101 replication origin conferred high GFP expression without reducing the growth rate, while further increasing GFP expression by a stronger promoter or a higher plasmid copy number inhibited cellular growth (e.g. pYC05, Log(GFP) = 3.529 ± 0.060; Supplemental Table S2 and Supplemental Fig. S2A). As the LB growth medium provided rich nitrogen sources but was short in carbohydrates, we added glucose as the nutrient supplement and found it significantly boosting cellular GFP expression. In this study, we quantified and reported GFP expression at OD 0.55-0.65 because it was relatively steady within this interval (Supplemental Fig. S2B).

**Definition of rank purity in cell sorting experiments**

The purity of a rank in cell sorting experiments was defined as the percentage of 50,000 examined cells falling in that rank and the bordering ranks (i.e. +1 and -1 rank) due to the following reason: GFP expression of individual genotypes showed a log-normal distribution on flow cytometry. Upon cell sorting, a given rank mainly contained genotypes whose distribution centered on this rank. Yet it also contained a smaller proportion of genotypes whose distribution centered at the bordering ranks but with its tails extending to this rank. As such, when cells collected in this rank were re-cultured for purity examination, the observed GFP distribution would extended slightly beyond the rank range set in cell sorting experiments. Consequently, we considered cells falling in the bordering ranks into account because they likely reflected phenotypic variation of individual genotypes rather than sorting errors.

**Logarithm of GFP expression as the fitness of SD**

The fitness effects of mutations can be partitioned into the additive part and the non-additive part, which are defined as mutational effects and epistasis, respectively. In order to quantify them, fitness measurements need to be transformed into a linear scale under which that the amount of mutations overall correlates with the amount of fitness variation. In our experimental system, changes in the SD sequence alter the rate of translation initiation, and hence cellular GFP expression. We defined the fitness of a genotype as the logarithm of its GFP expression (Log(GFP)) because the amount of mutations in the SD sequence directly affected the SD:aSD base pairing, the SD:aSD duplex length correlated linearly with the base-pairing energy, and the base-pairing energy correlated linearly with Log(GFP). The stated relationship is consistent with our experimental results and predictions made by a RNA folding algorithm (Fig. 1B; Supplemental Fig. S4) (Lorenz et al. 2011). Moreover, it can be proven by the following formula derivation providing that cells are in a quasi-steady state:

Define

r: ribosome, m: mRNA, rm: ribosome-mRNA complex, p: protein, ∅: empty set, *k*on: association rate, *k*off: dissociation rate, *k*t: translation rate, *k*d: dilution rate, Ka: association constant, t: time, R: Boltzmann constant, T: absolute temperature, ∆G: change in Gibbs free energy


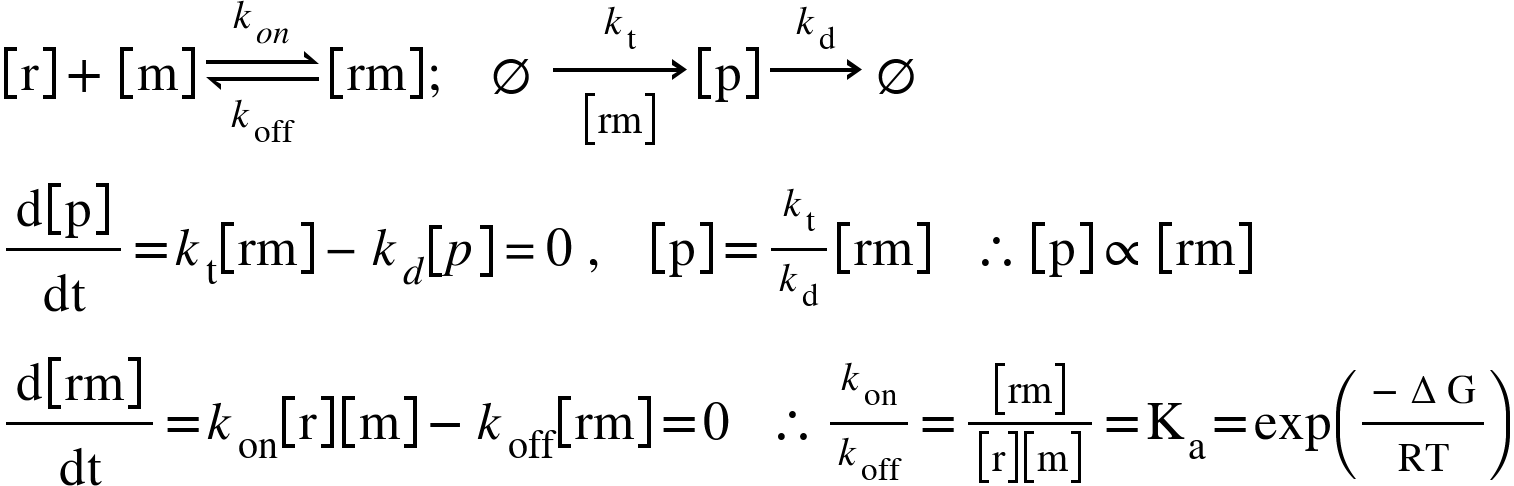


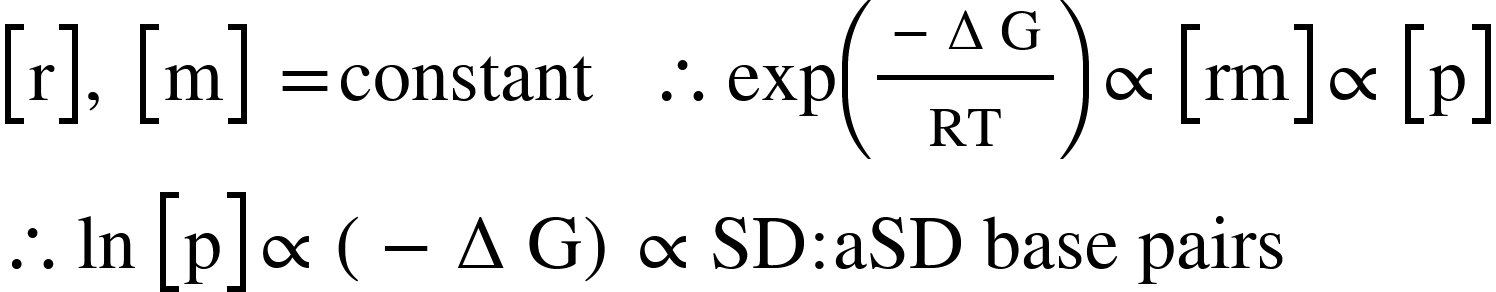


**Calculation of the fitness of genotypes**

The fitness of a genotype was calculated based on its read count distribution across the sorting ranks (Eq. 1, 2) and a linear regression equation (Eq. 3; Supplemental Table S4) of spike-in variants. This equation was generated by linear regression of the rank means of spike-in variants measured by sort-seq experiments and their cellular fluorescence (Log(GFP) or Log(YFP)) quantified separately by the cell sorter:

Define

*v*: a genotypic variant

*N*: total amount of sorting ranks

Rank *r* = {1, 2, 3, …..N-2, N-1, N}

*z*r: read counts of *v* in Rank *r*

*m*: the slope of the linear regression equation of spike-in variants

*b*: the intercept of the linear regression equation of spike-in variants

The sum of read counts of *v* was


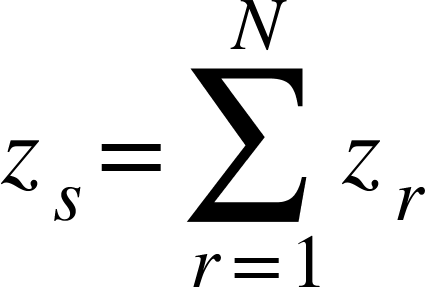
 (Eq. 1)

The rank mean of *v* was


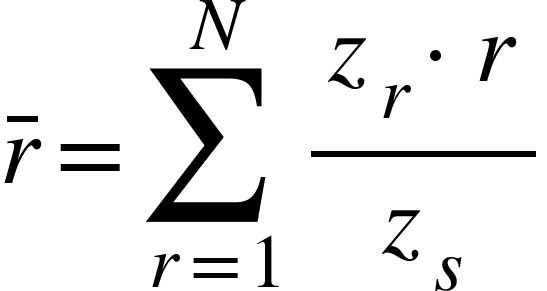
 (Eq. 2)

The fitness of *v* was


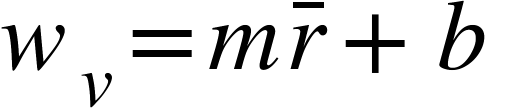
 (Eq. 3)

**Fitness measurements of template genotypes used for library construction**

As discussed in “Results”, our sort-seq experiments measured fitness reliably for most genotypes. Nevertheless, we found sort-seq unsuitable for quantifying the fitness of template genotypes, pYC09, pYC08, pYC20, and pHC199v, used for constructing the FL*fepB*, FL*arti*, FL*dmsC*, and FL*arti*-Y libraries, respectively. The read counts of these template genotypes distributed evenly across ranks, preventing us from estimating their fitness based on the sequencing read distribution (Supplemental File S2-4). This phenomenon might result from incomplete *DpnI* enzyme digestion intended to eliminate template genotypes during library construction. As such, when reporting the fitness of template genotypes, we referred to their fitness directly measured by the cell sorter (pYC08: 2.861 ± 0.053, pYC09: 2.317 ± 0.034, pYC20: 3.058 ± 0.041, pHC199v: 2.804 ± 0.065) instead of fitness quantified by sort-seq experiments.

**Mean fitness effects of the RBS context, single nucleotides, and pairwise epistasis**

The mean fitness effects of the RBS context, single nucleotides, and pairwise epistasis were calculated as the following:

Define

*v*: a genotypic variant

*V*tot: a set including total variants of a library

*wv*:fitness of *v*

*x, y* = {1, 2, 3, 4, 5, 6, 7, 8, 9}

*n* = {A, U, G, C}

*nx, ny*: nucleotide at position ‘*x*’ or ‘*y*’ in SD

*V*(*nx*) = {*v* | *v*’s *x*th nucleotide is *n*}

*N*(*v*) = {*nx*, *ny* | *v*’s *x*th or *y*th nucleotide}

| |: the cardinality of a set

The mean fitness effect of the RBS context (1 term), equivalent to the mean fitness of the total genotypes of a library, was


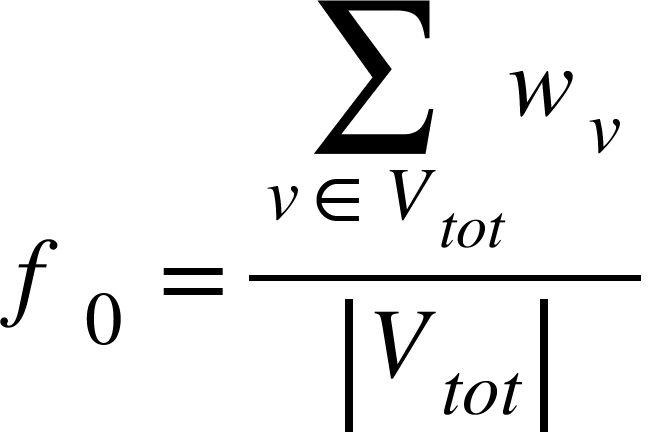
 (Eq. 4)

The mean fitness effects of single nucleotides (36 terms) were


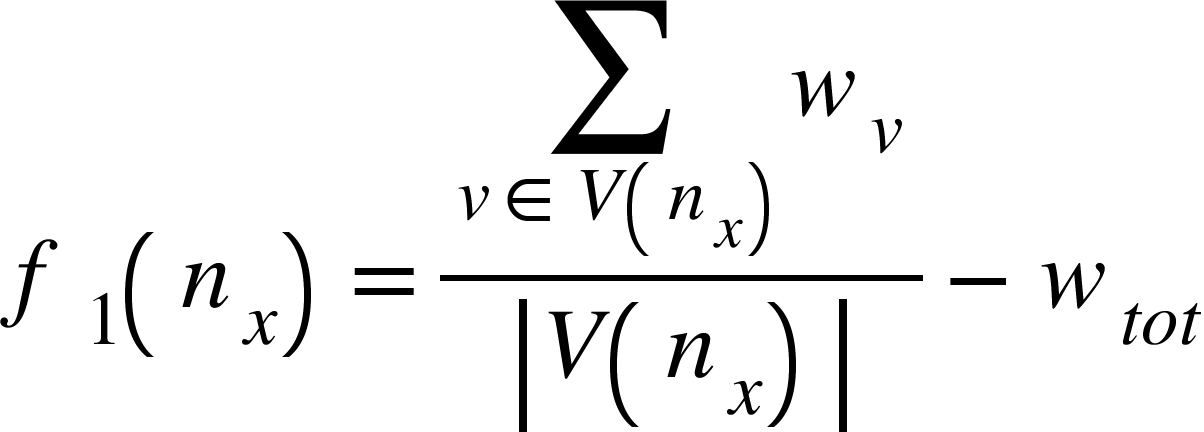
 (Eq. 5)

The mean fitness effects of pairwise epistasis (576 terms) were


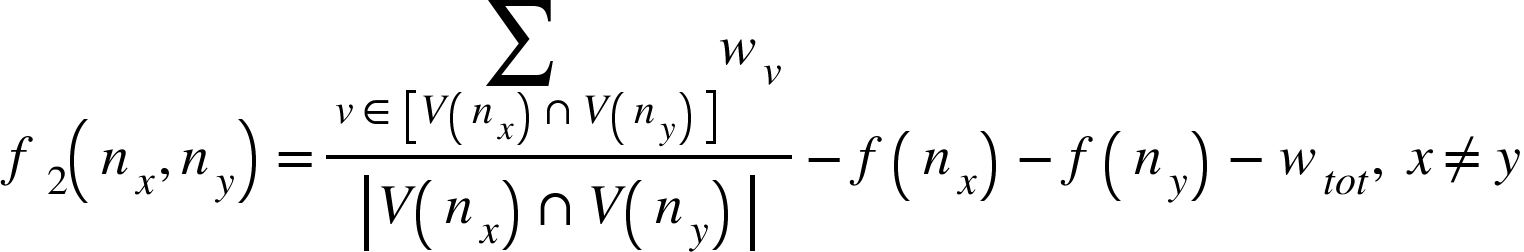
 (Eq. 6)

Reciprocally, the fitness of each genotype could be predicted by summing up the mean fitness effects of the RBS context, 9 single nucleotides, and 36 types of pairwise epistasis:


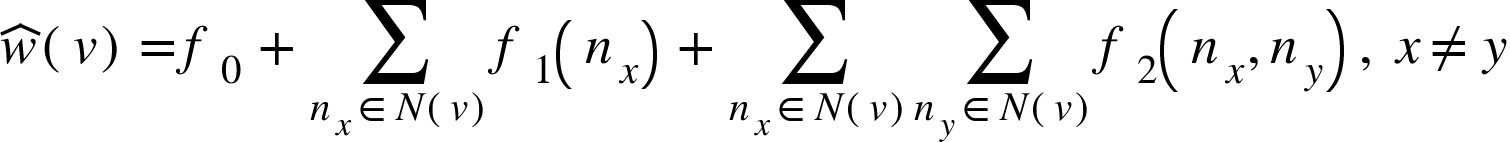
 (Eq. 7)

**Relative importance of the SD:aSD base-pairing strength, SD:aSD base-pairing location, and RNA folding energy to fitness**

As shown in Supplemental Text section “Logarithm of GFP expression as the fitness of SD”, fitness is proportional to ∆G yielded upon forming stable ribosome-mRNA complexes. Besides SD:aSD base-pairing strength, ∆G is also attributed to mRNA folding energy and the structural constraint set by the SD:aSD base-pairing location relative to the start codon. We applied multiple linear regression to evaluate the relative contribution of the three biophysical variables to fitness. The three variables of each genotype were predicted by a RNA folding algorithm (Lorenz et al. 2011). We used empirical equations derived previously to estimate the quantitative impact of the SD:aSD base-pairing location on ∆G (Salis et al. 2009). Multiple regression yielded the following linear equations for the three SD fitness landscapes, where *w*, *x*, *y*, and *z* corresponded to fitness, SD:aSD base-pairing strength, SD:aSD base-pairing location, and RNA folding energy, respectively:

FL*fepB*: *w* = -0.2690*x* + 0.0152*y* + 0.0964*z* + 1,8526 (R2 *=* 0.5303)

FL*arti*: *w* = -0.1666*x* - 0.0102*y* + 0.0721*z* + 1.2032 (R2 *=* 0.4465)

FL*dmsC*: *w* = -0.1145*x* + 0.0056*y* + 0.0418*z* + 0.9856 (R2 *=* 0.3410)

Among *x*, *y* and *z*, the *x* coefficients consistently showed the largest magnitude, suggesting a stronger influence of SD:aSD base-pairing strength on fitness in our experimental system.

**Probability of chain-breaking mutations**

The probability of chain-breaking mutations occurred in the duplex formed by two single- stranded RNA (ssRNA) made of any sequences is calculated as the following:

Define:

*L*: length of two position-aligned ssRNA

*d*: length of a duplex formed by the two ssRNA in which no mismatch interrupts its base pairing

*x*: nucleotide position on ssRNA, *x* = {1, 2, 3,..., *L*-2, *L*-1, *L*}

*y*(*x*): shortest length between the *x*th position and the edge nucleotides on ssRNA


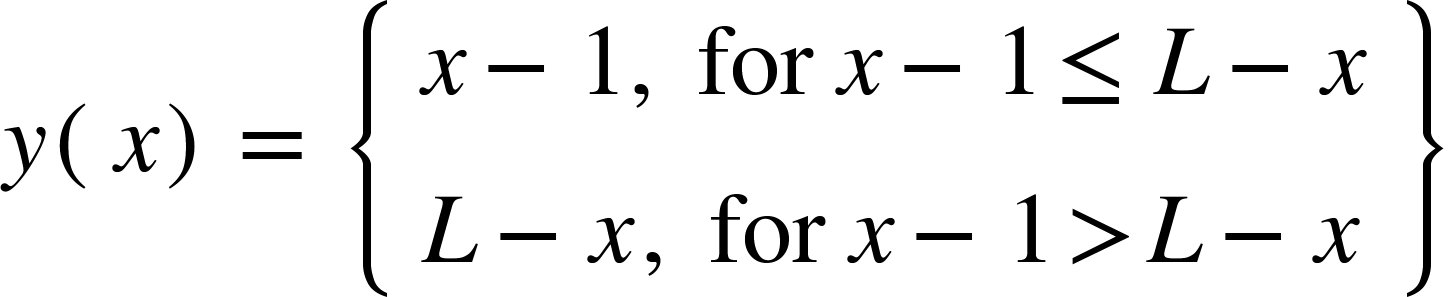
 (Eq. 8)

Sum of events in which the *x*th position coincides with the internal nucleotides of a duplex:


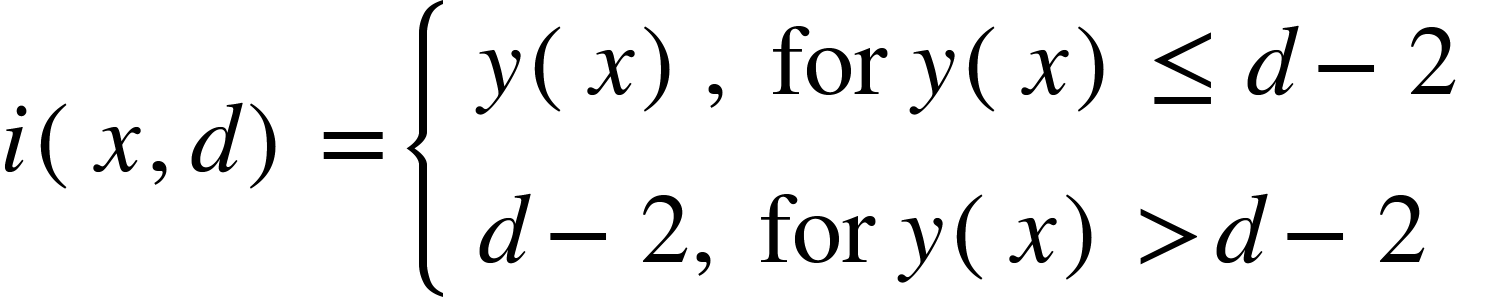
 (Eq. 9)

Probability of the *x*th position coinciding with the internal nucleotides of a duplex:


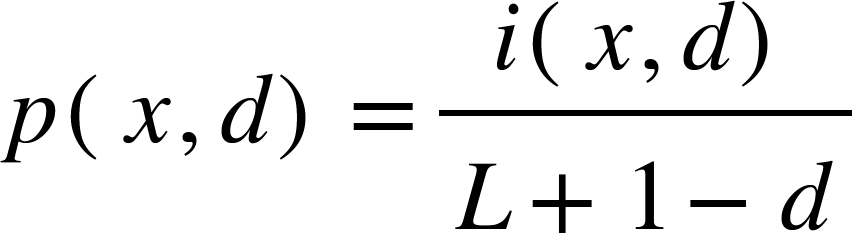
 (Eq. 10)

To illustrate how the calculation of chain-breaking probability works, an example (*L* = 9, *d* = 5) is provided below. Matrix A shows all of the five possible locations in which a 5-bp duplex could be formed by two 9-nt position-aligned ssRNA. In matrix A, the top row vector indicates position *x*. The edge and internal nucleotides of the duplex are indicated by “E” and “I”, respectively.


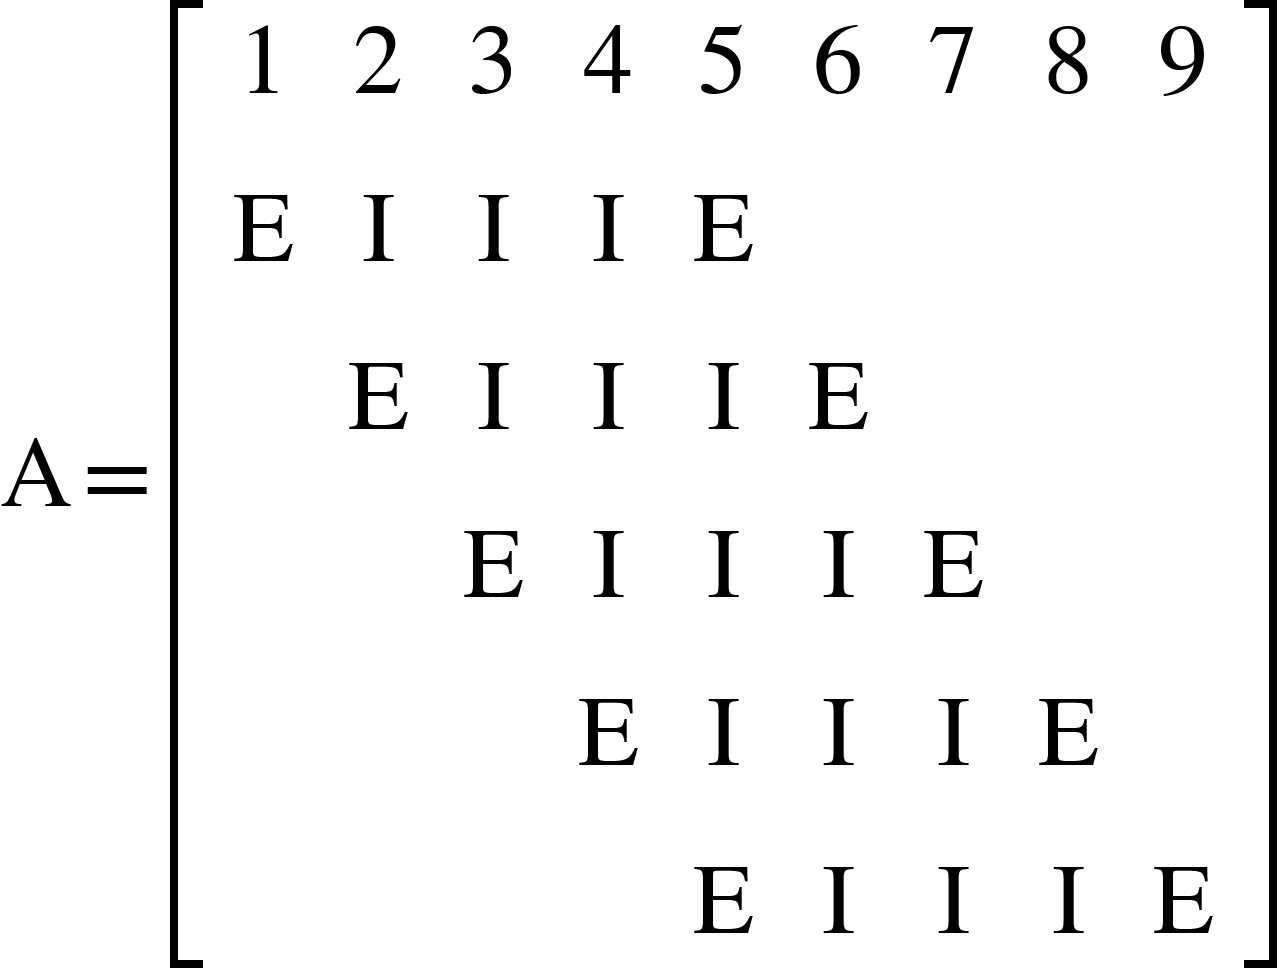


The corresponding outputs of functions *y*(*x*), *i*(*x,d*), and *p*(*x,d*) are shown by matrix M below, in which the top row vector indicates position *x*.

Define

*ma,b*: the item at the *a*th row and *b*th column of matrix M

*x* = *m*1,* , *y*(*x*) = *m*2,* , *i*(*x,d*) = *m*3,* , *p*(*x,d*) = *m*4,*


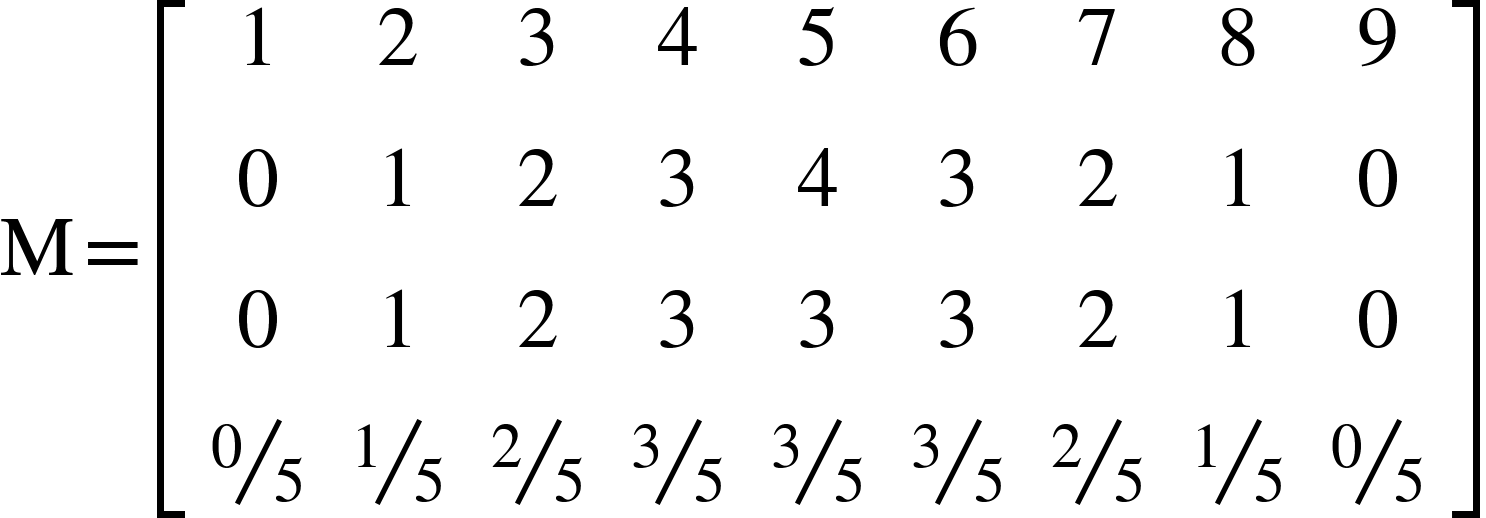


**Reference**

Bonde MT, Pedersen M, Klausen MS, Jensen SI, Wulff T, Harrison S, Nielsen AT, Herrgard MJ, Sommer MOA. 2016. Predictable tuning of protein expression in bacteria. *Nat Methods* **13**: 233-236.

Brunner M, Bujard H. 1987. Promoter recognition and promoter strength in the *Escherichia coli* system. *EMBO J* **6**: 3139-3144.

Chen YT, Chang KC, Hu HT, Chen YL, Lin YH, Hsu CF, Chang CF, Chang KY, Wen JD. 2017. Coordination among tertiary base pairs results in an efficient frameshift-stimulating RNA pseudoknot. *Nucleic Acids Res* **45**: 6011-6022.

Chou HH, Delaney NF, Draghi JA, Marx CJ. 2014. Mapping the fitness landscape of gene expression uncovers the cause of antagonism and sign epistasis between adaptive mutations. *PLoS Genet* **10**: e1004149.

Chou HH, Marx CJ, Sauer U. 2015. Transhydrogenase promotes the robustness and evolvability of *E. coli* deficient in NADPH production. *PLoS Genet* **11**: e1005007.

Davis JH, Rubin AJ, Sauer RT. 2011. Design, construction and characterization of a set of insulated bacterial promoters. *Nucleic Acids Res* **39**: 1131-1141.

Kosuri S, Goodman DB, Cambray G, Mutalik VK, Gao Y, Arkin AP, Endy D, Church GM. 2013. Composability of regulatory sequences controlling transcription and translation in *Escherichia coli*. *Proc Natl Acad Sci USA* **110**: 14024-14029.

Li QZ, Lin YC, Sun YH, Song J, Chen H, Zhang XH, Sederoff RR, Chiang VL. 2012. Splice variant of the SND1 transcription factor is a dominant negative of SND1 members and their regulation in *Populus trichocarpa*. *Proc Natl Acad Sci USA* **109**: 14699-14704.

Livak KJ, Schmittgen TD. 2001. Analysis of relative gene expression data using real-time quantitative PCR and the 2−∆∆Ct Method. *Methods* **25**: 402-408.

Lorenz R, Bernhart SH, Honer Zu Siederdissen C, Tafer H, Flamm C, Stadler PF, Hofacker IL. 2011. ViennaRNA Package 2.0. *Algorithms Mol Biol* **6**: 26.

Marshall RA, Dorywalska M, Puglisi JD. 2008. Irreversible chemical steps control intersubunit dynamics during translation. *Proc Natl Acad Sci USA* **105**: 15364-15369.

Peterson J, Phillips GJ. 2008. New pSC101-derivative cloning vectors with elevated copy numbers. *Plasmid* **59**: 193-201.

Rueden CT, Schindelin J, Hiner MC, DeZonia BE, Walter AE, Arena ET, Eliceiri KW. 2017. ImageJ2: ImageJ for the next generation of scientific image data. *BMC Bioinformatics* **18**.

Salis HM, Mirsky EA, Voigt CA. 2009. Automated design of synthetic ribosome binding sites to control protein expression. *Nat Biotechnol* **27**: 946-950.

Sanner MF. 1999. Python: A programming language for software integration and development. *J Mol Graph Model* **17**: 57-61.

van de Meent JW, Bronson JE, Wiggins CH, Gonzalez RL. 2014. Empirical Bayes methods enable advanced population-level analyses of single-molecule FRET experiments. *Biophys J* **106**: 1327-1337.

Zaslaver A, Bren A, Ronen M, Itzkovitz S, Kikoin I, Shavit S, Liebermeister W, Surette MG, Alon U. 2006. A comprehensive library of fluorescent transcriptional reporters for *Escherichia coli*. *Nat Methods* **3**: 623-628.


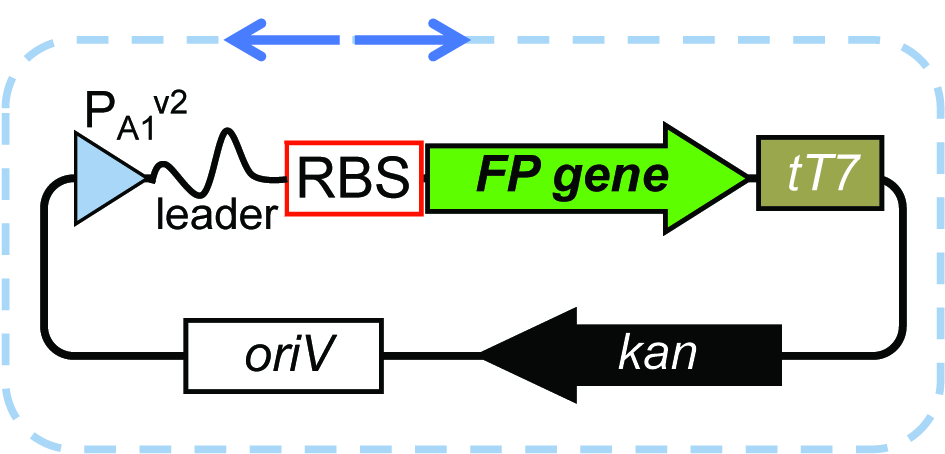


Supplemental Fig. S1. Structure of template plasmids. The primer pair for SD library construction and the amplified region of inverse PCR are shown as blue arrows and dashed lines, respectively. PA1v2, a variant of promoter A1 from phage lambda T7; RBS, ribosome binding site; FP, green or yellow fluorescent proteins; tT7, T7 terminator; *kan*, kanamycin resistance gene, *oriV*, pSC101 replication origin.


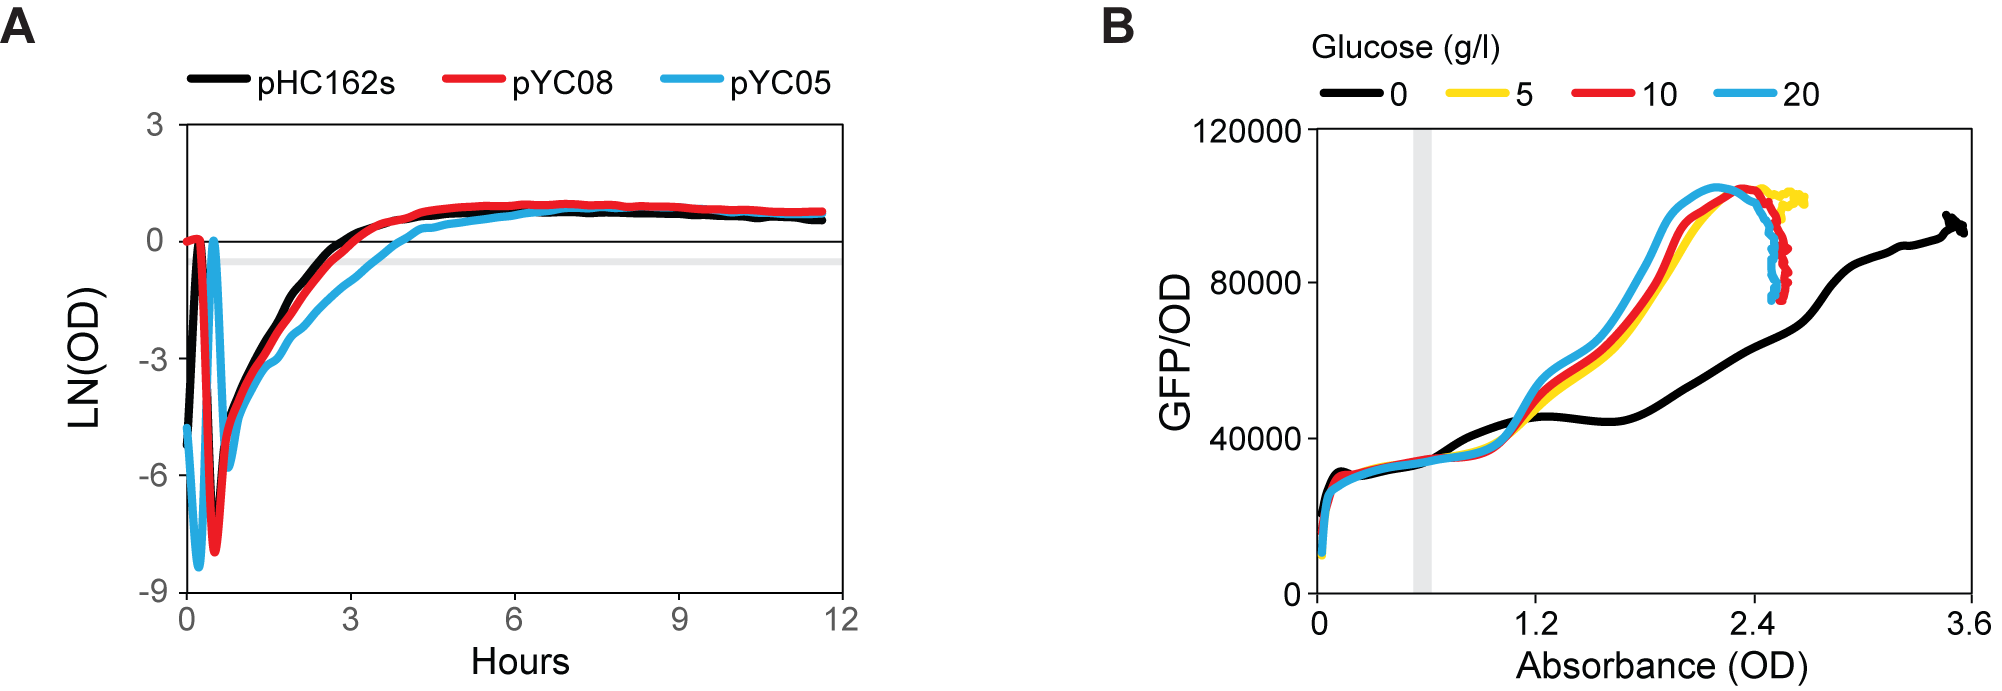


Supplemental Fig. S2. Growth and GFP expression profiles of *E. coli*. (*A*) Growth of *E. coli* bearing plasmids pHC162s (empty plasmid without GFP expression), pYC08 (FL*arti* template plasmid, Log(GFP) = 2.861 ± 0.053), or pYC05 (non-template plasmid, Log(GFP) = 3.529 ± 0.060) in LBK medium. Growth rates (hr-1, reported as means ± 95% confidence intervals) of pHC162s, pYC08, and pYC05 are 1.630 ± 0.127, 1.534 ± 0.153, and 1.102 ± 0.045 at OD = 0.55-0.65, respectively. (*B*) Relationship between the optical density (OD) of the cell culture and cellular GFP expression (GFP/OD) of *E. coli* bearing plasmid pYC08 in LBK medium supplemented with different amounts of glucose. (*A, B*) OD and GFP fluorescence are quantified by the plate reader. The grey zones correspond to the range (OD = 0.55-0.65) of sample collection for sort-seq experiments. Results from one of the five independent experiments are shown as the representative.


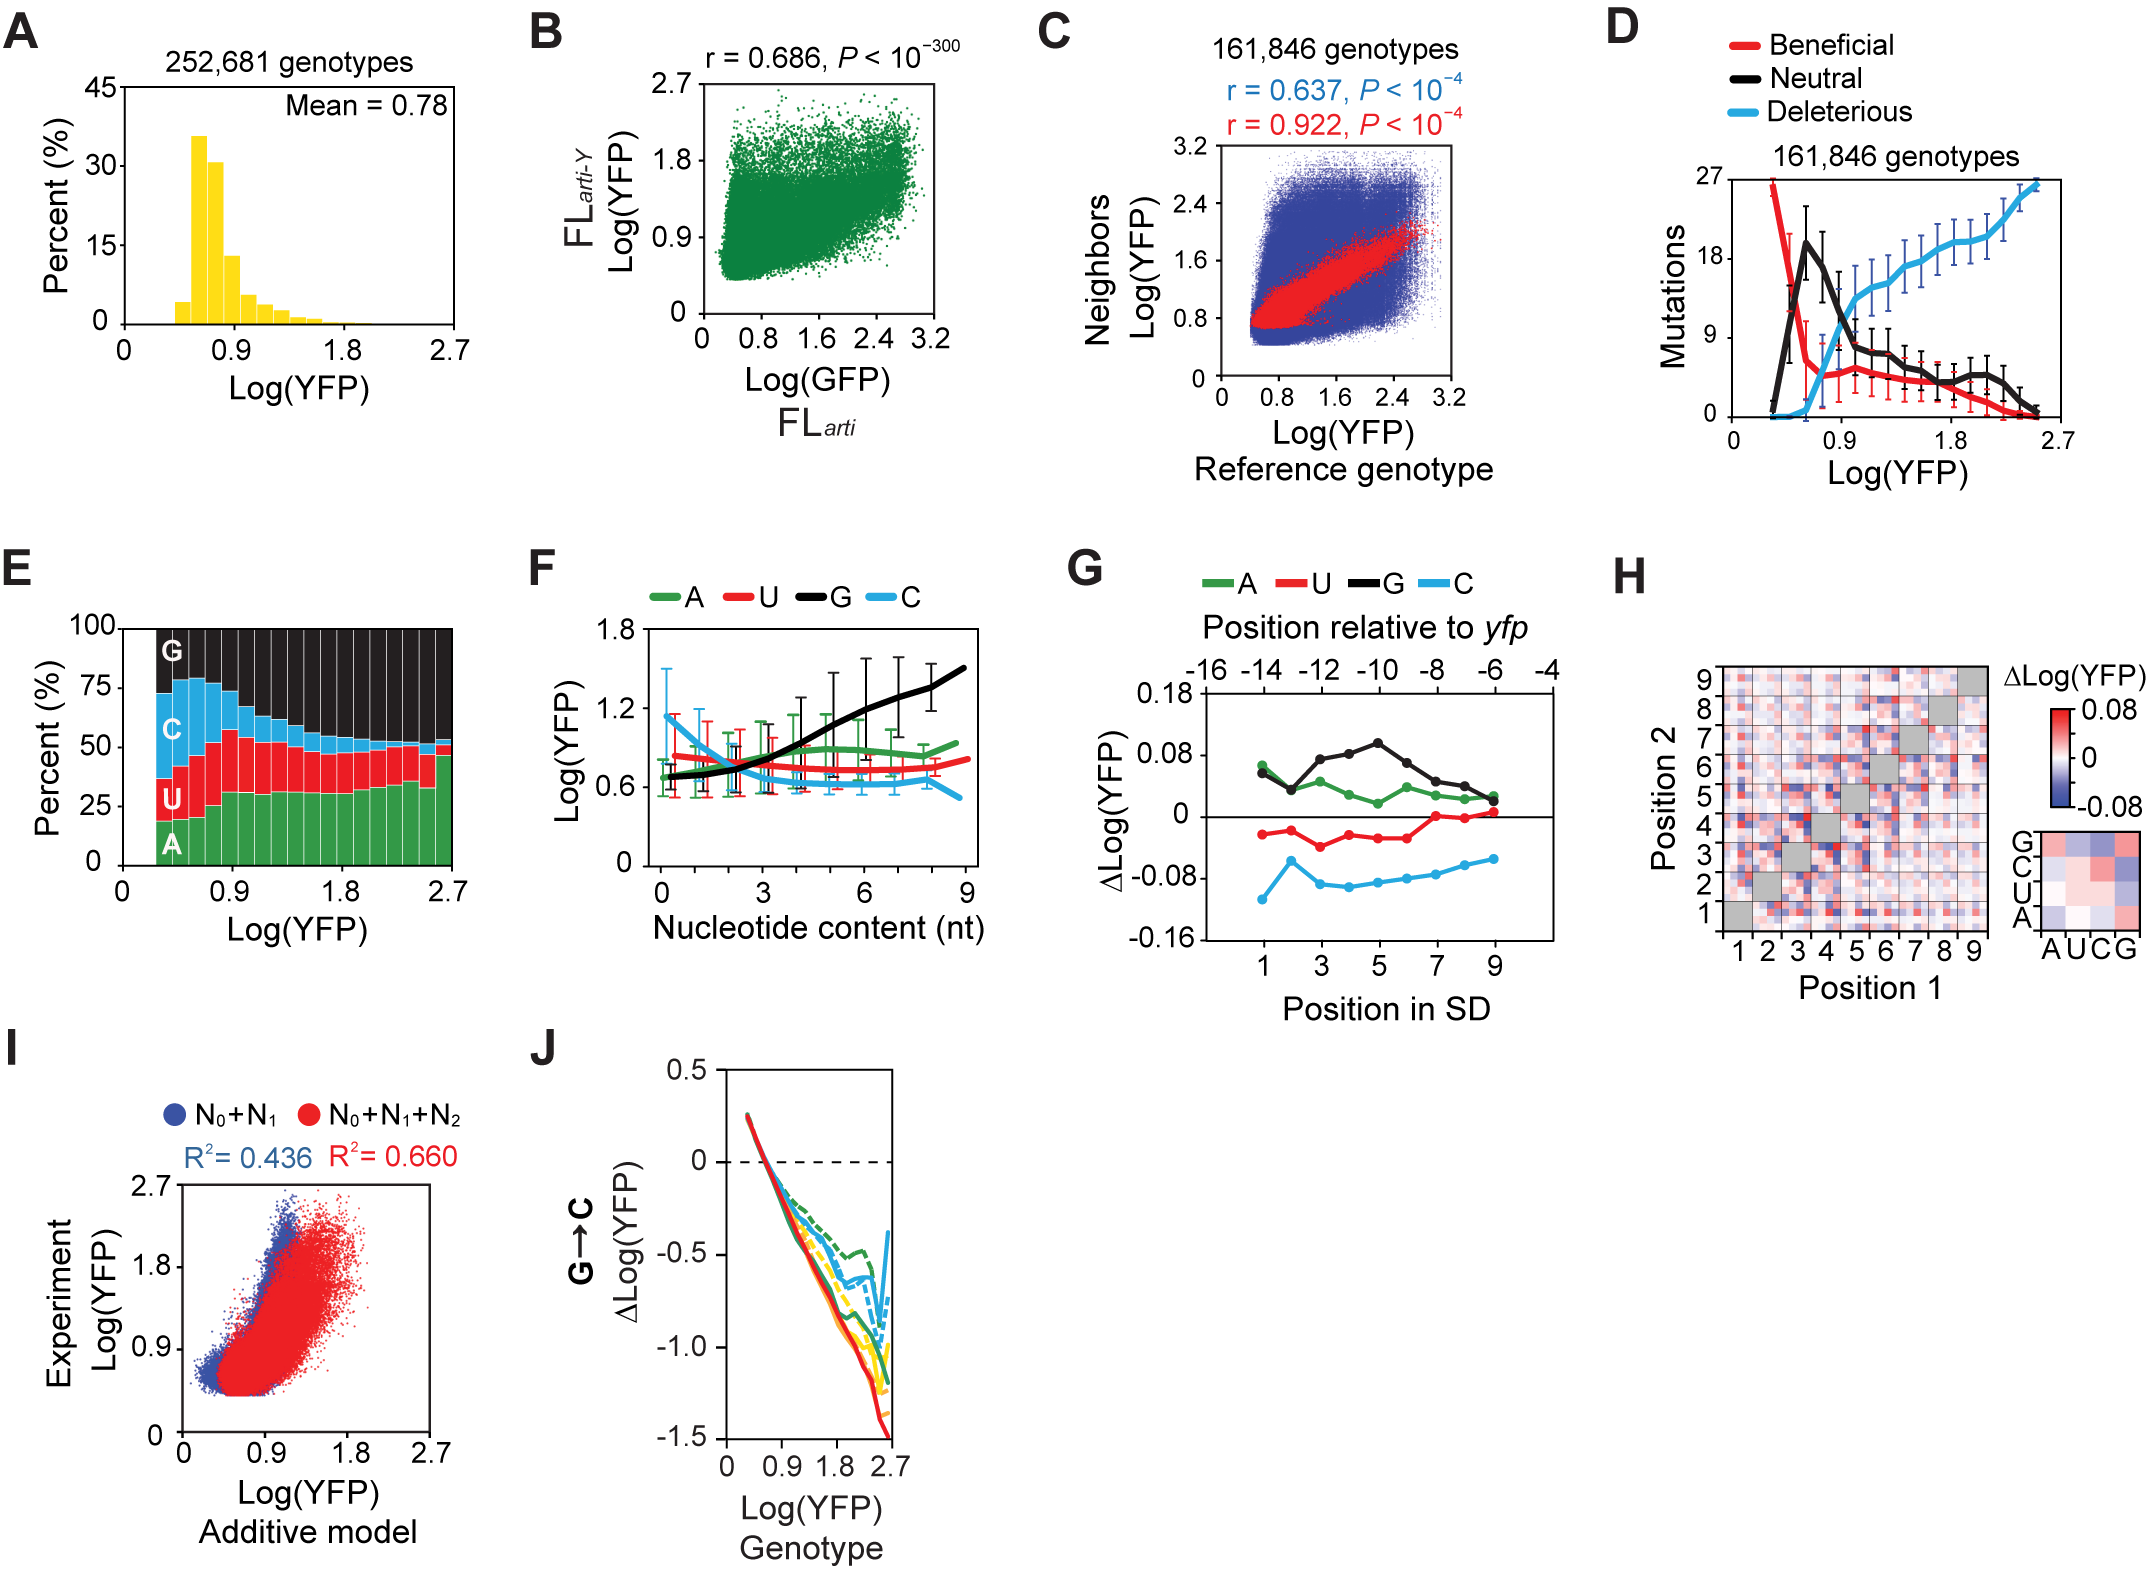


Supplemental Fig. S3. G-P mapping properties in FL*arti*-Y. (*A*) Fitness (Log(YFP)) distribution. (*B*) Correlation (Pearson’s r, t-test) between the G-P mapping of FL*arti* and FL*arti*-Y. (*C*) Relationship (Pearson’s r, permutation test) between the fitness of a genotype and the individual (blue) or mean fitness (red) of its 27 single-mutation neighbors. (*D*) Relationship between the fitness of a genotype and the abundance of beneficial, neutral, and deleterious mutations. The library average of sort-seq measurement errors (0.108) sets the operational cutoff to distinguish the three mutation types. (*E*) Relationship between fitness and the nucleotide composition. (*F*) Relationship between the nucleotide content and fitness. Lines and bars indicate group means and standard deviations, respectively. (*G*) Mean fitness effects of single nucleotides. (*H*) Mean fitness effects of pairwise epistasis. (*I*) Explanatory power (R2) of the RBS context (N0), single-nucleotides (N1) and pairwise epistasis (N2) on fitness. (*J*) Dependence of G→C mutational effects on the nucleotide positions and the background fitness. Each line, colored according to Fig. 6A, shows the mean fitness effects of G→C mutations at each nucleotide position across 20 fitness-ranked groups. (*A, D, E, J*) genotypes are ranked by fitness and grouped into 20 equal-size bins.


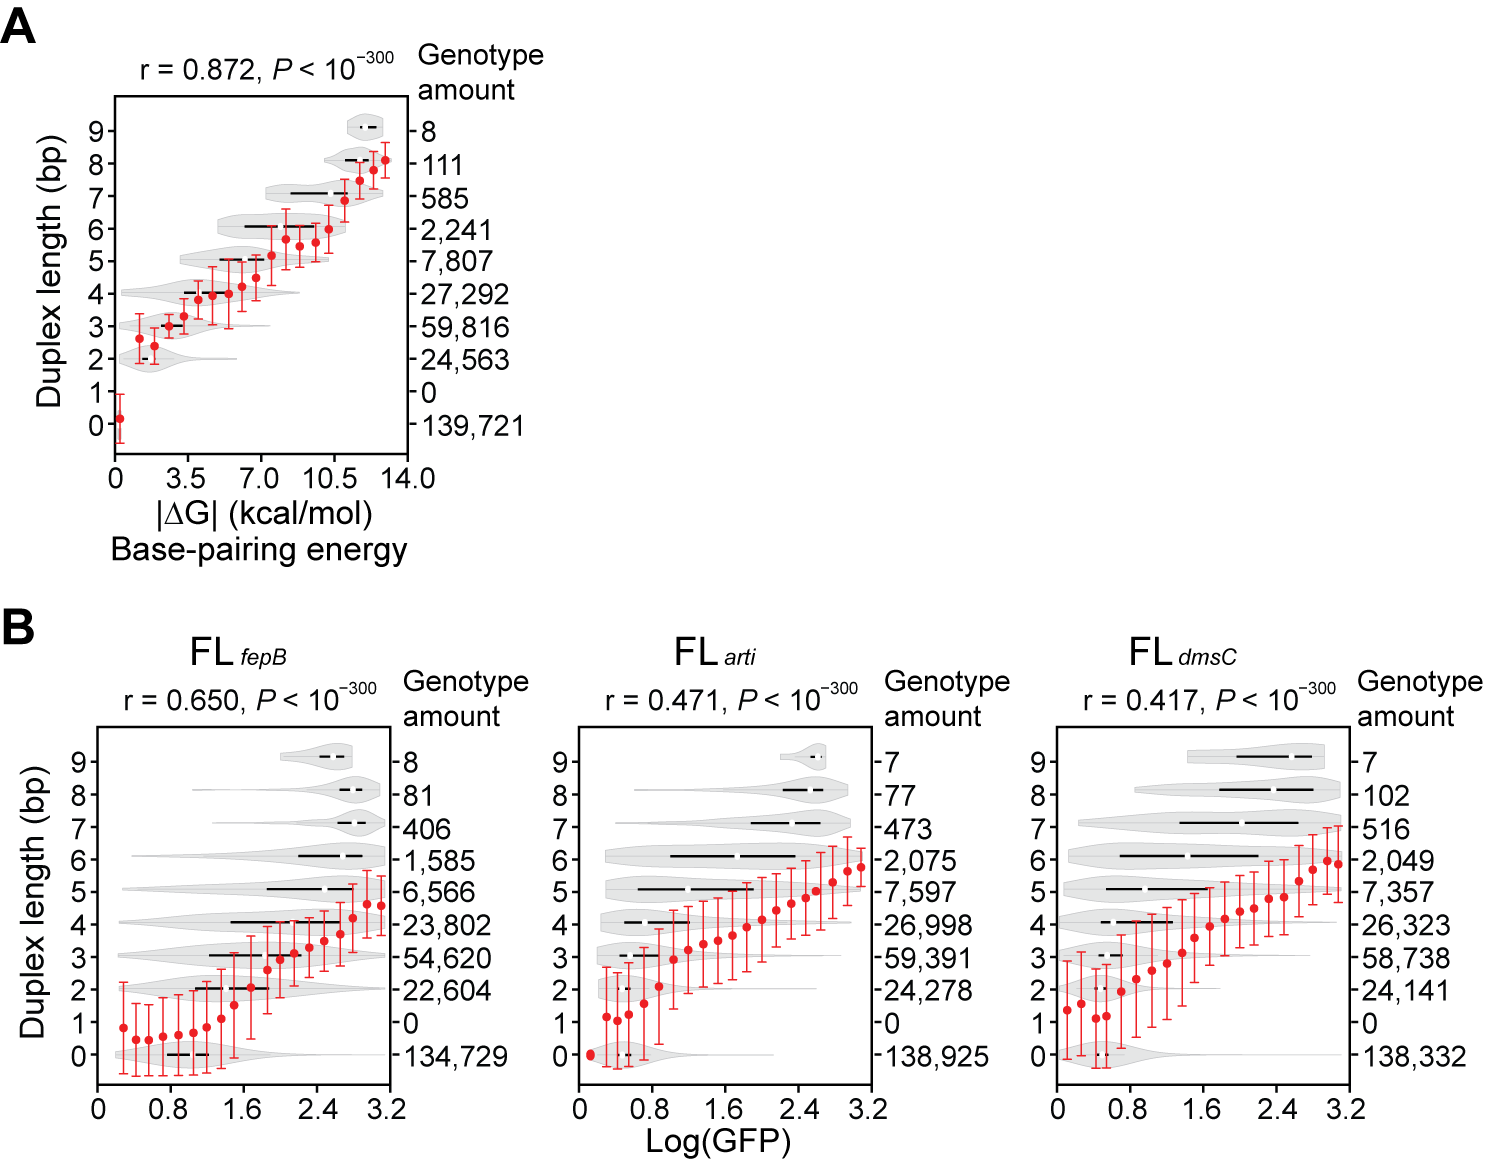


Supplemental Fig. S4. Correlation (Pearson’s r) between the SD:aSD duplex length, base-pairing energy, and fitness. (*A*) Correlation between the SD:aSD base-pairing energy (∆G) and the length of the longest uninterrupted SD:aSD RNA duplex. (*B*) Correlation between the fitness (Log(GFP)) of genotypes and the length of the longest uninterrupted SD:aSD duplex. (*A, B*) Genotypes are ranked vertically in terms of their duplex length. The distribution of each length-ranked group across the horizontal axis is presented as a violin plot, where medians and interquartile ranges are indicated by white circles and black lines, respectively. The patterns of base pairing between the aSD sequence and each of the 262,144 9-nt SD genotypes are predicted by a RNA folding algorithm (Lorenz et al. 2011). ∆G (predicted values ≤ 0) is shown as absolute values for simplicity. Genotypes are ranked horizontally by the base-pairing energy (*A*) or fitness (*B*) and grouped into 20 equal-size bins. Group means and standard deviations of the duplex length are indicated by red dots and bars, respectively.


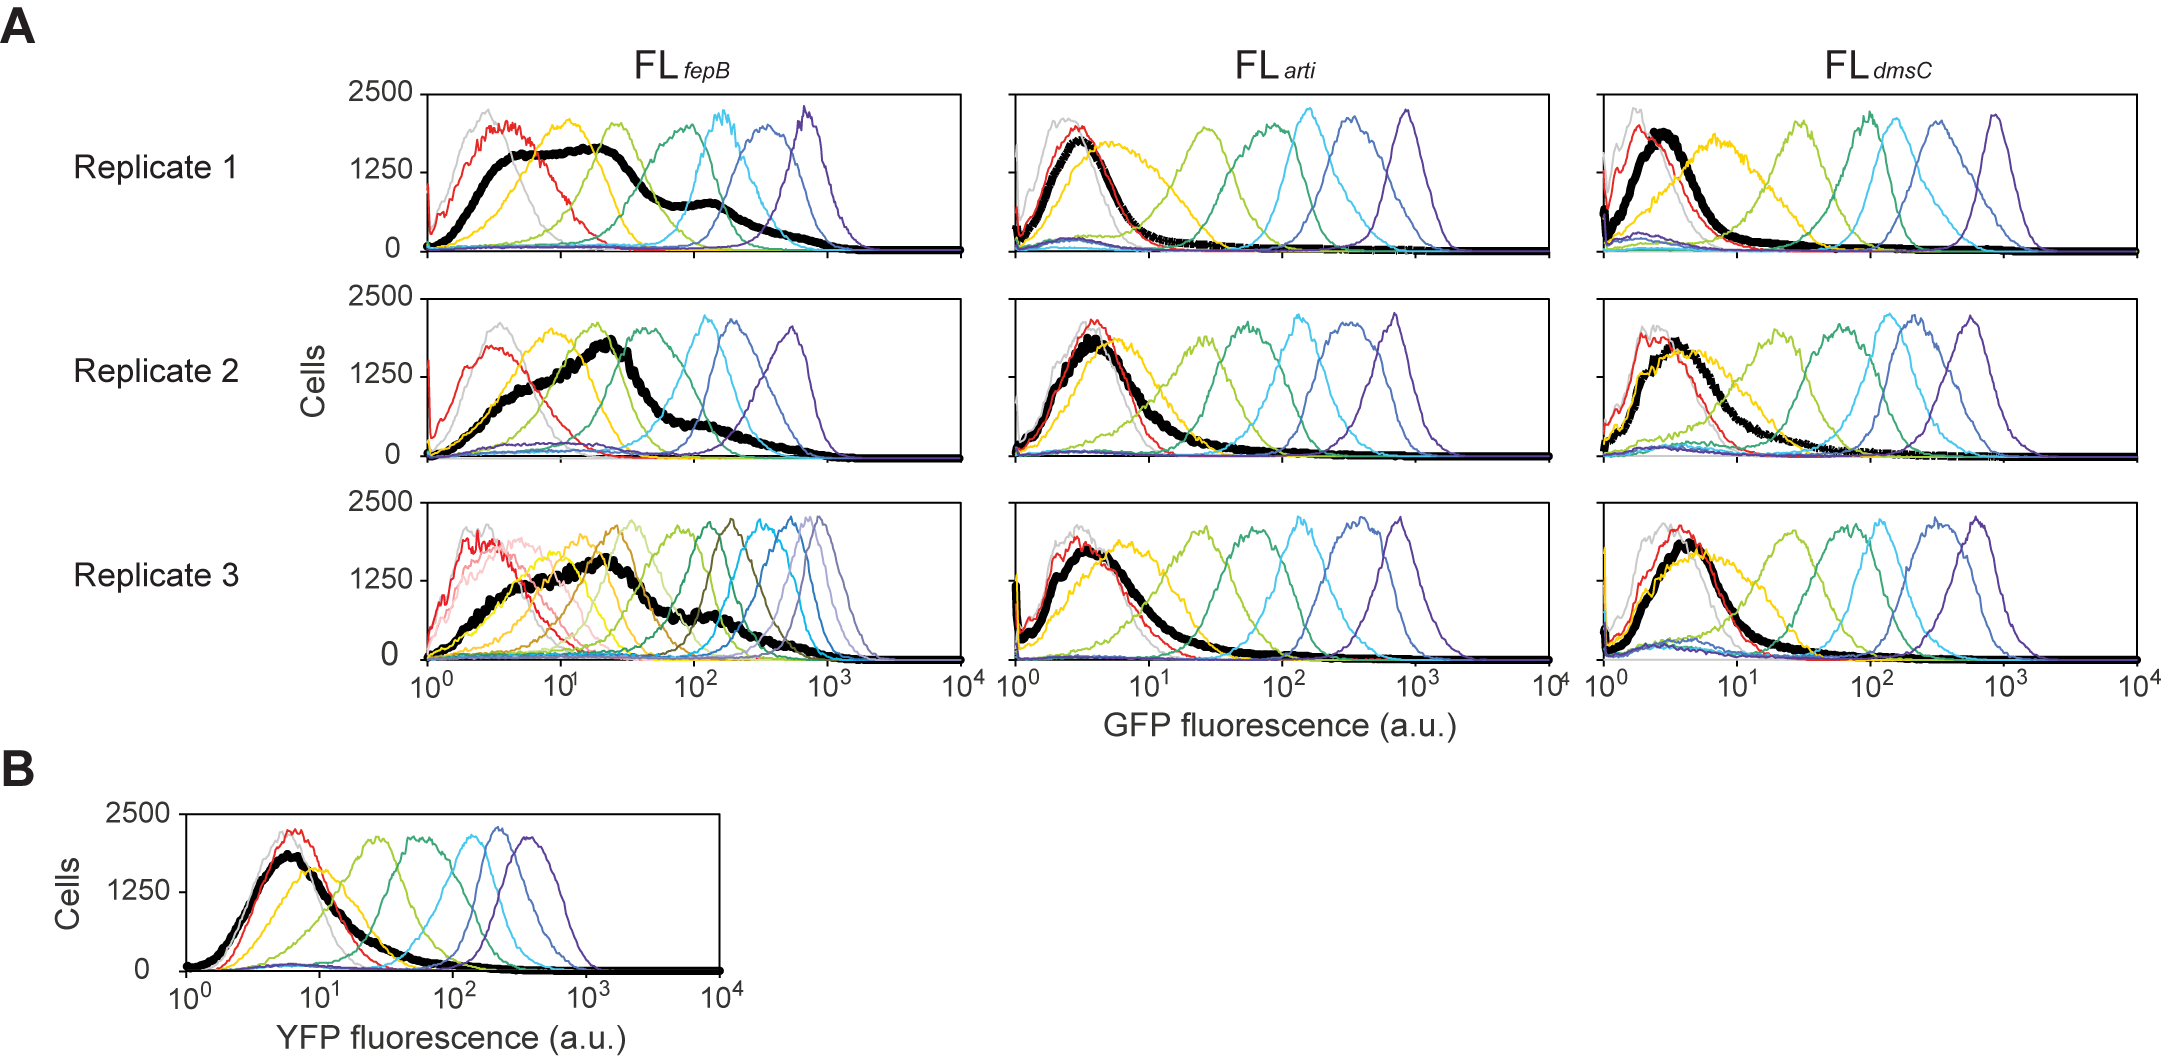


Supplemental Fig. S5. Fluorescence-activated cell sorting. (*A, B*) The distribution of cellular fluorescence (arbitrary unit, a.u.) of each replicate library is shown separately. In each panel, a thick black line indicates the original library distribution, while thin lines in various colors indicate the fluorescence distribution of the 8 or 15 ranks of *E. coli* cells collected by fluorescence-activated cell sorting. (*A*) Three replicates of the FL*fepB*, FL*arti*, and FL*dmsC* libraries. (*B*) FL*arti*-Y library.


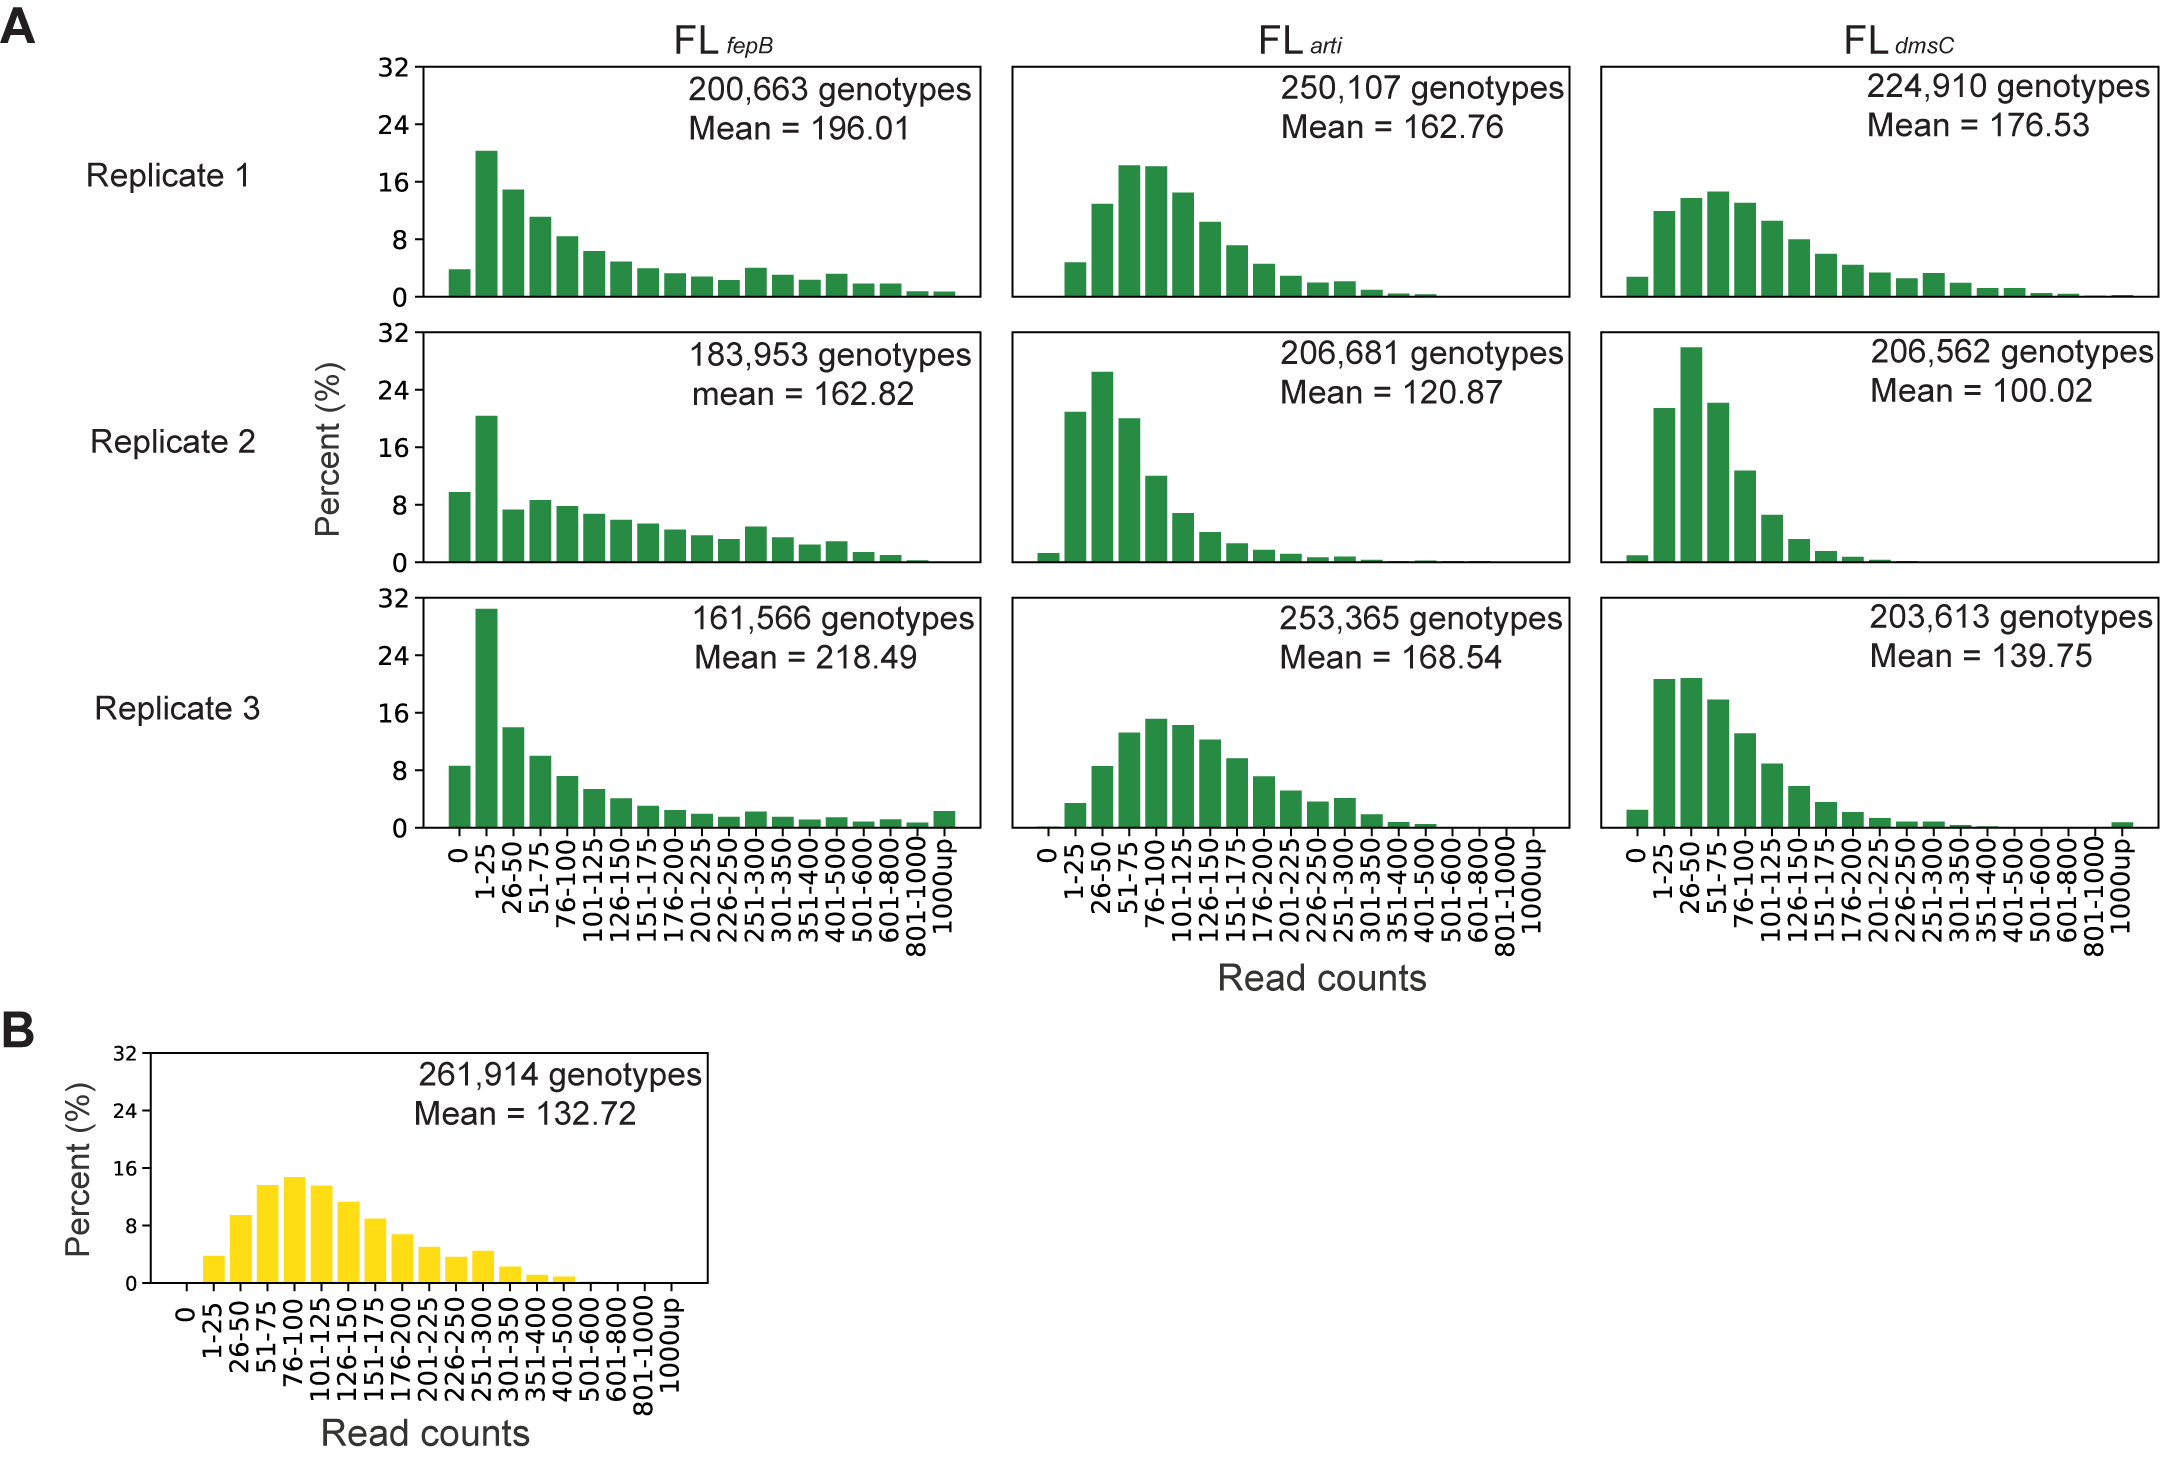


Supplemental Fig. S6. Distribution of the read counts of genotypes. (*A*) Three sort-seq replicate experiments of the FL*fepB*, FL*arti*, and FL*dmsC* libraries. (*B*) One sort-seq experiment of the FL*arti*-Y library. (*A, B*) Genotypes are ranked by their read counts and grouped into 19 numerical categories. The amount of detected genotypes (read count ≥1) and their mean read counts are indicated in each panel.


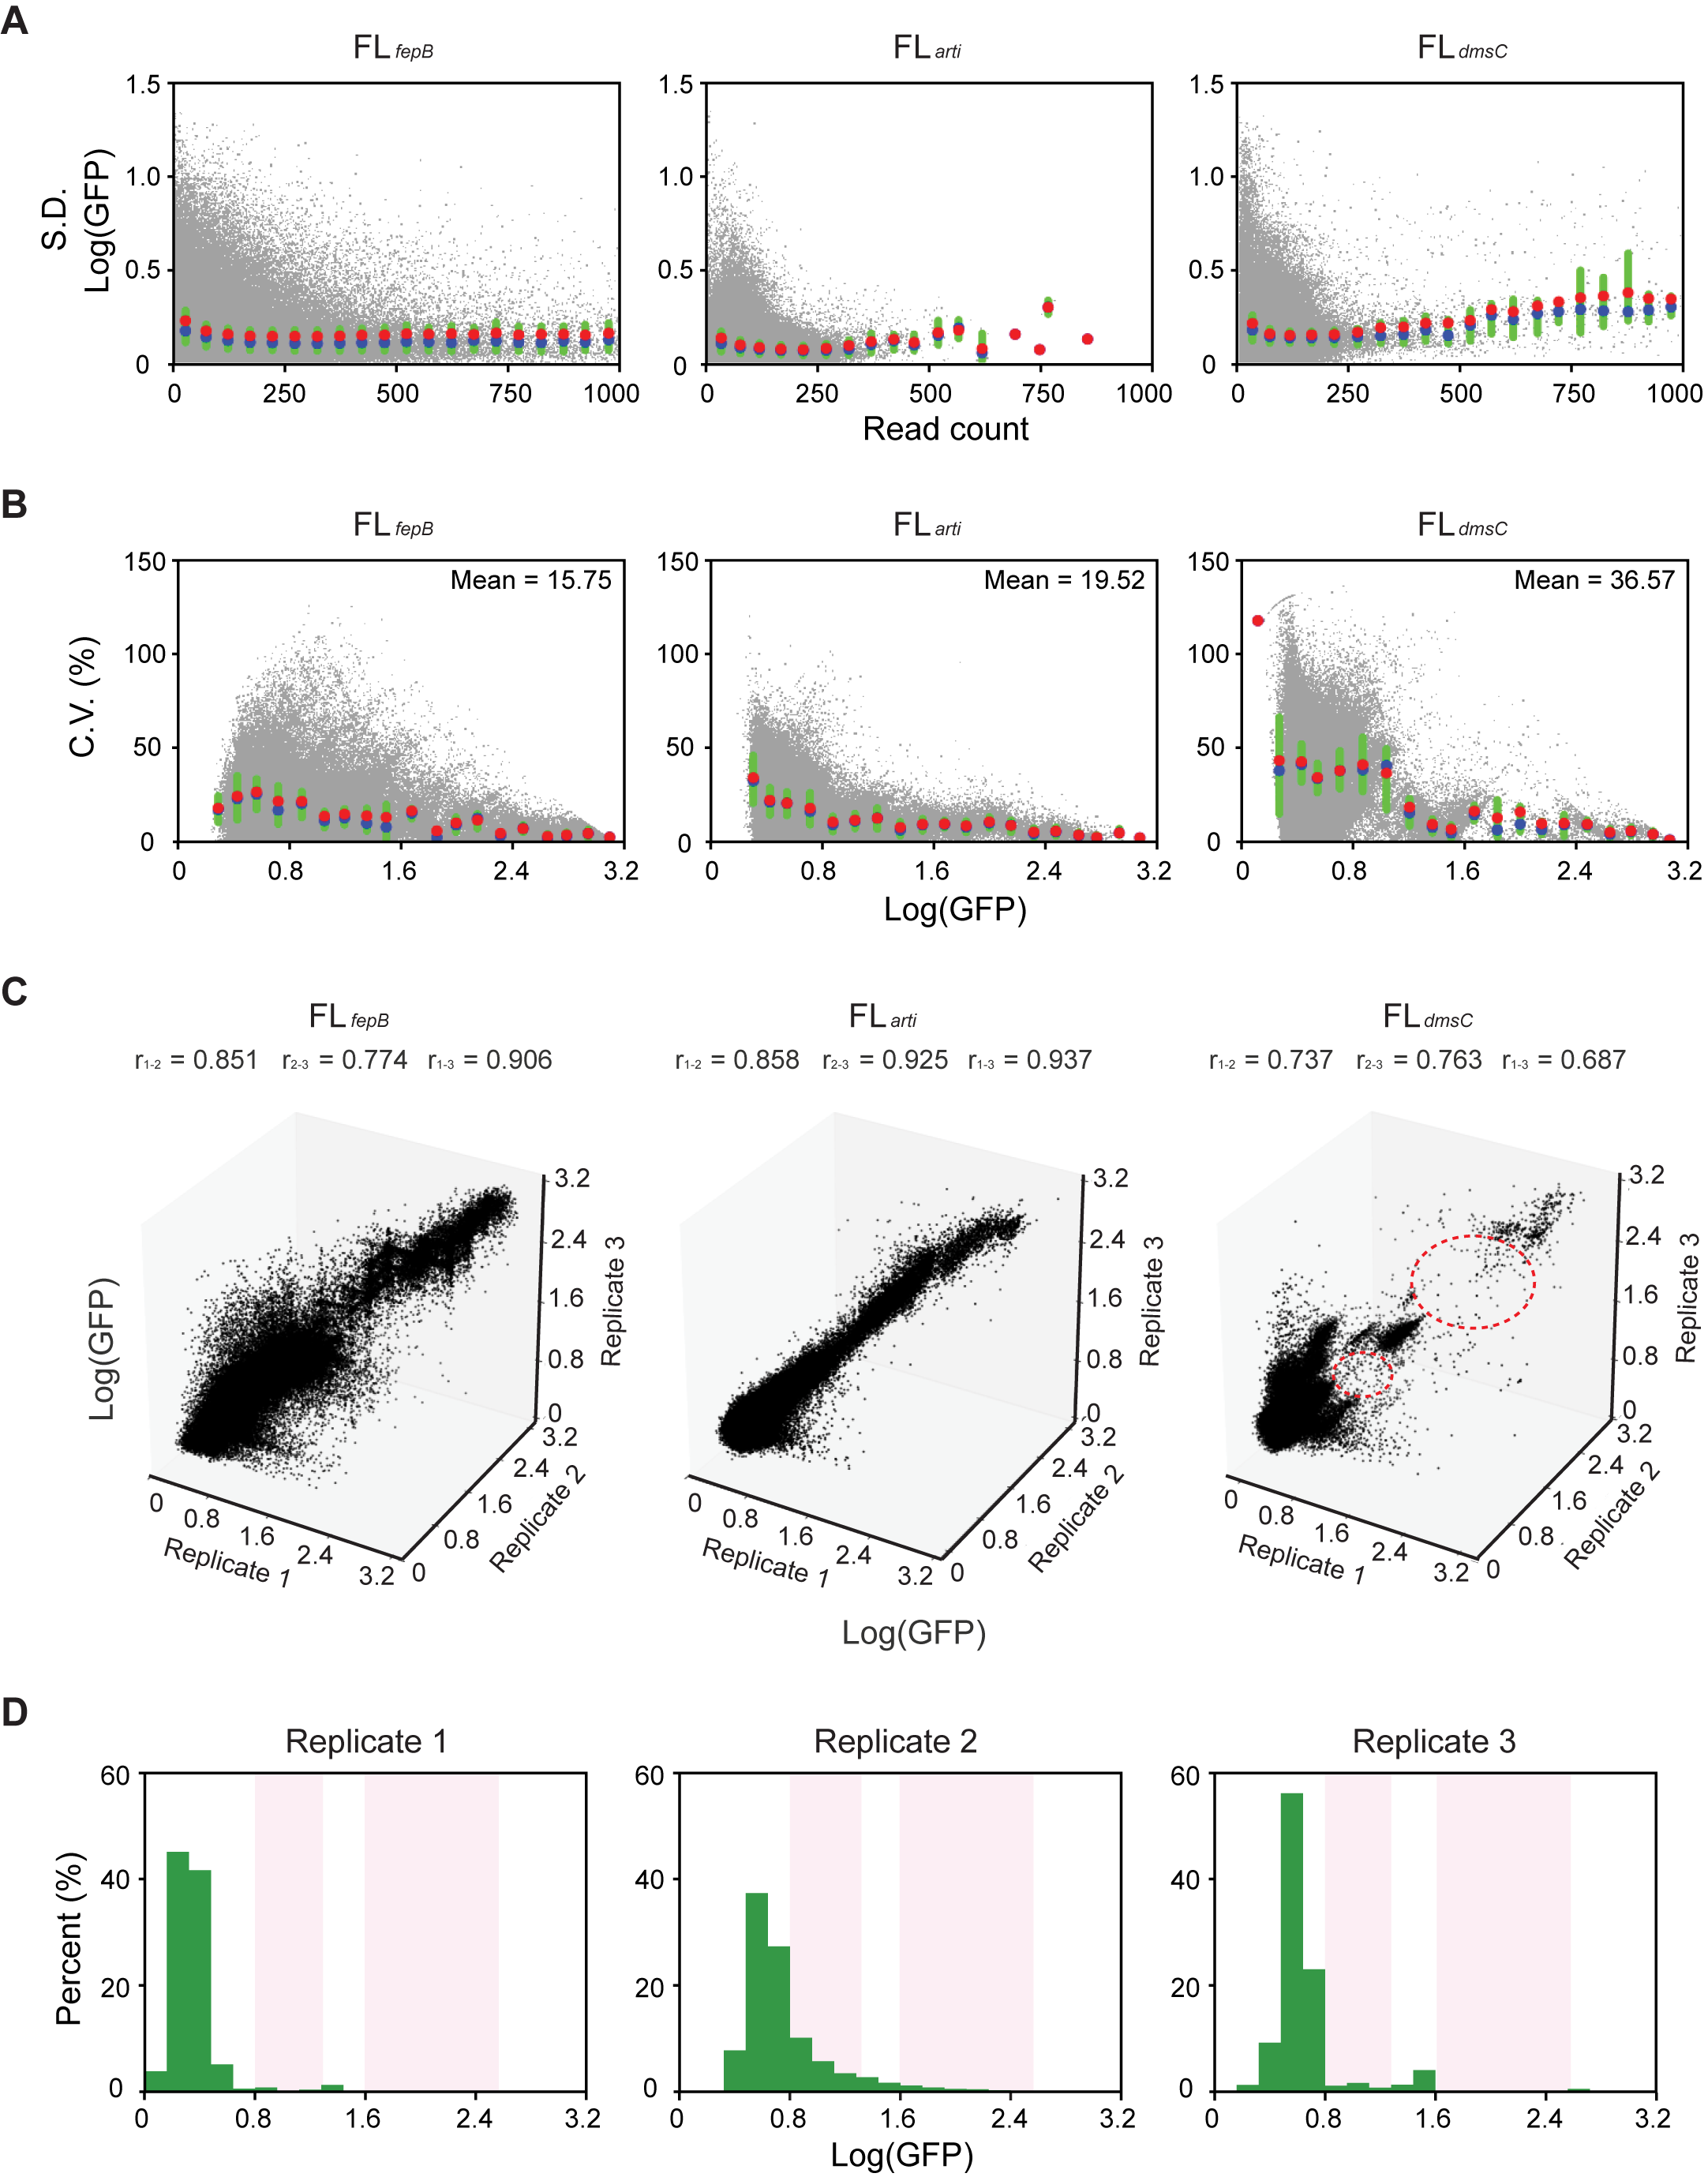


Supplemental Fig. S7. Quality of sort-seq experiments. (*A*) Relationship between the read count and the standard deviation (S.D.) of fitness (Log(GFP)) of each genotype measured by three replicate experiments. (*B*) Relationship between fitness and its coefficient of variation (C.V.) of each genotype. (*A, B*) Genotypes are ranked by read counts (*A*) or fitness (*B*) and grouped into 20 equal-size bins. Group means, medians, and interquartile ranges of S.D. are shown as red circles, blue circles, and green bars, respectively. (*C*) Correlation (Pearson’s r) between the fitness of genotypes in FL*fepB*, FL*arti*, and FL*dmsC* characterized by three replicate experiments. The *P* values of all pairwise replicate correlations are below 10-300. The low-coverage zones in FL*dmsC*, resulting from many genotypes present in just one or two replicate experiments, are marked by two red dashed circles. (*D*) Highlighting the two low-coverage zones (pink windows) in the fitness distribution of FL*dmsC* characterized by three sort-seq replicate experiments. Genotypes are ranked by fitness and grouped into 20 equal-size bins.


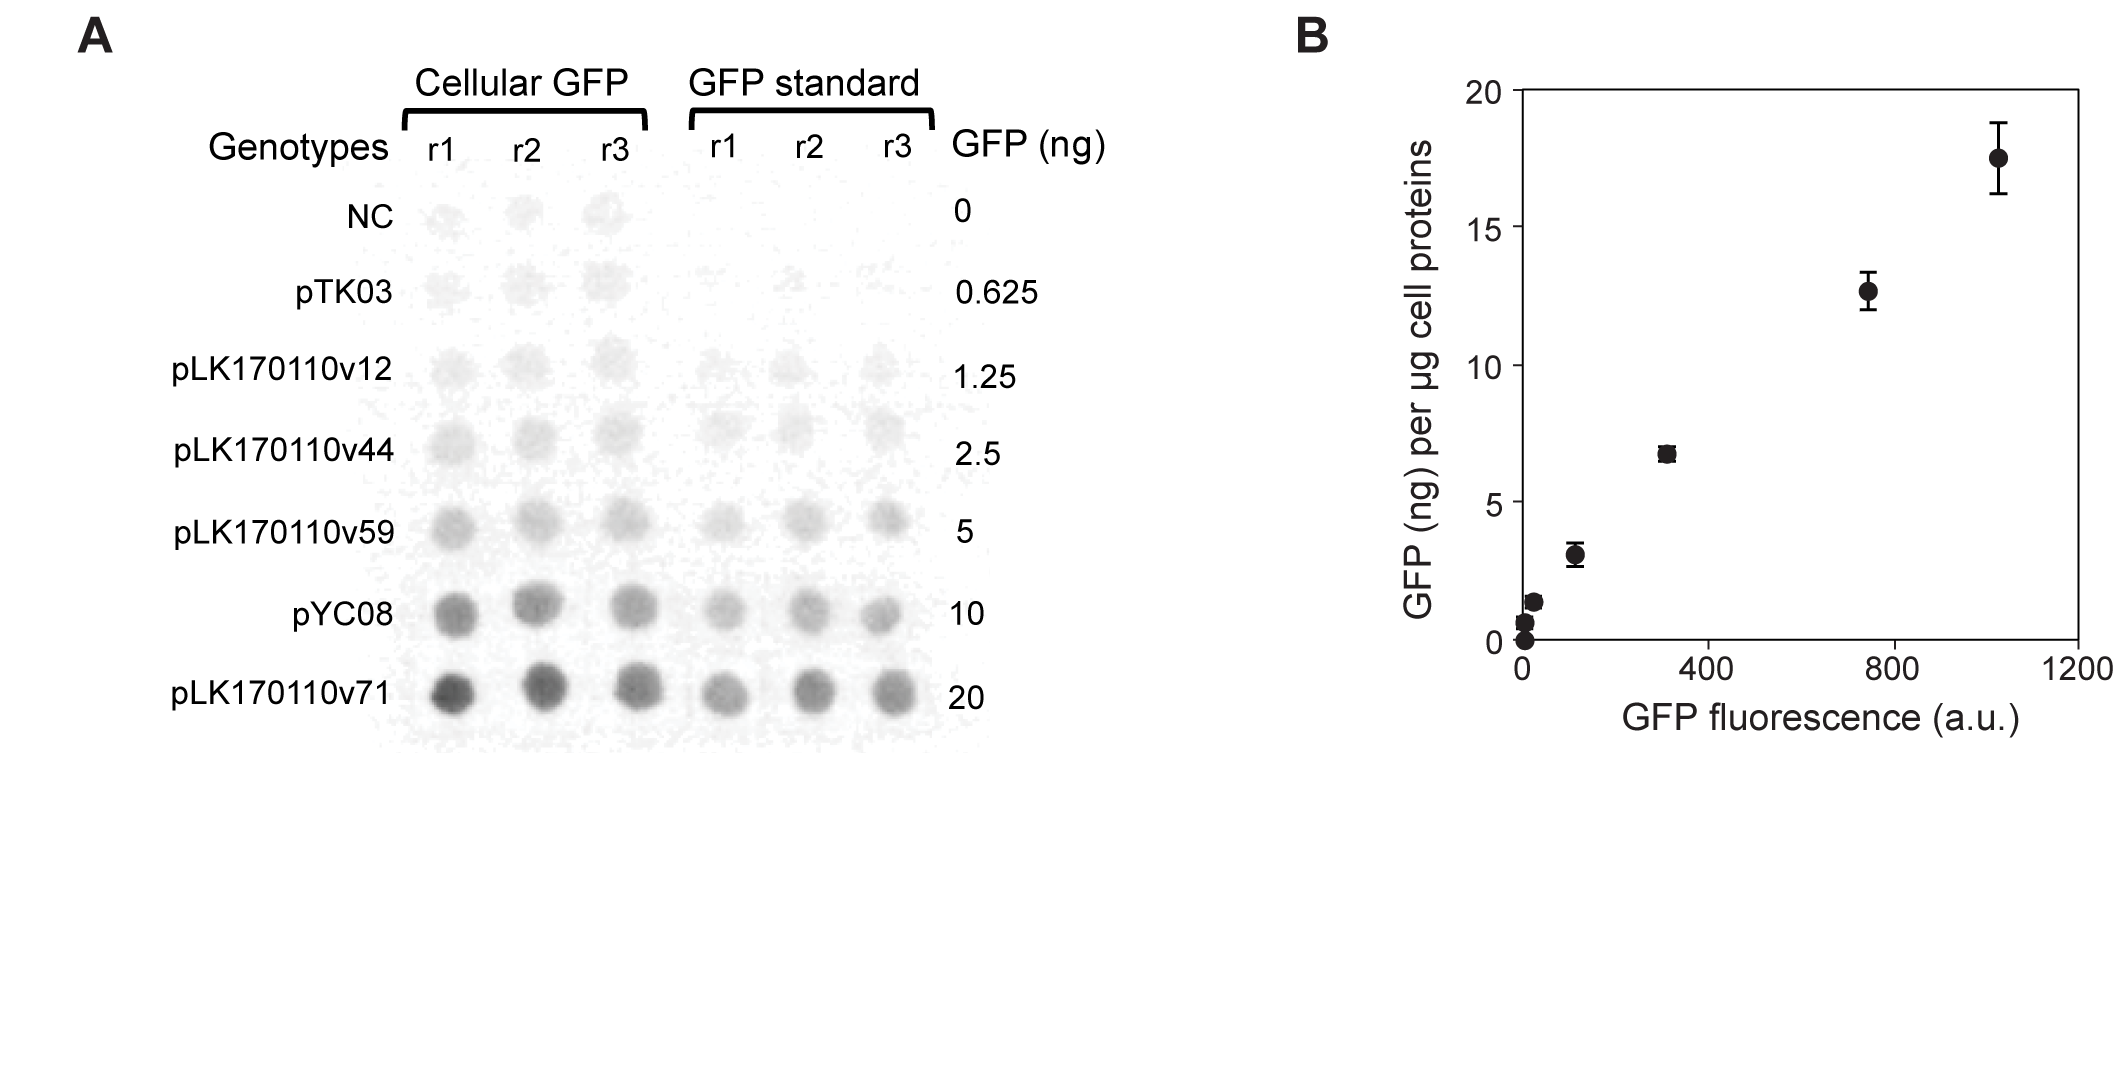


Supplemental Fig. S8. Relationship between cellular fluorescence and GFP expression. (*A*) Quantification of GFP production in *E. coli* free of plasmids (NC) or bearing 6 different FL*arti* genotypes by dot blot experiments. (*B*) Correlation (Pearson’s r = 0.997, *P* < 0.05) between cellular fluorescence (quantified by the cell sorter; arbitrary unit, a.u.) and GFP production. Dots and error bars indicate the means and standard deviations of three independent measurements, respectively.


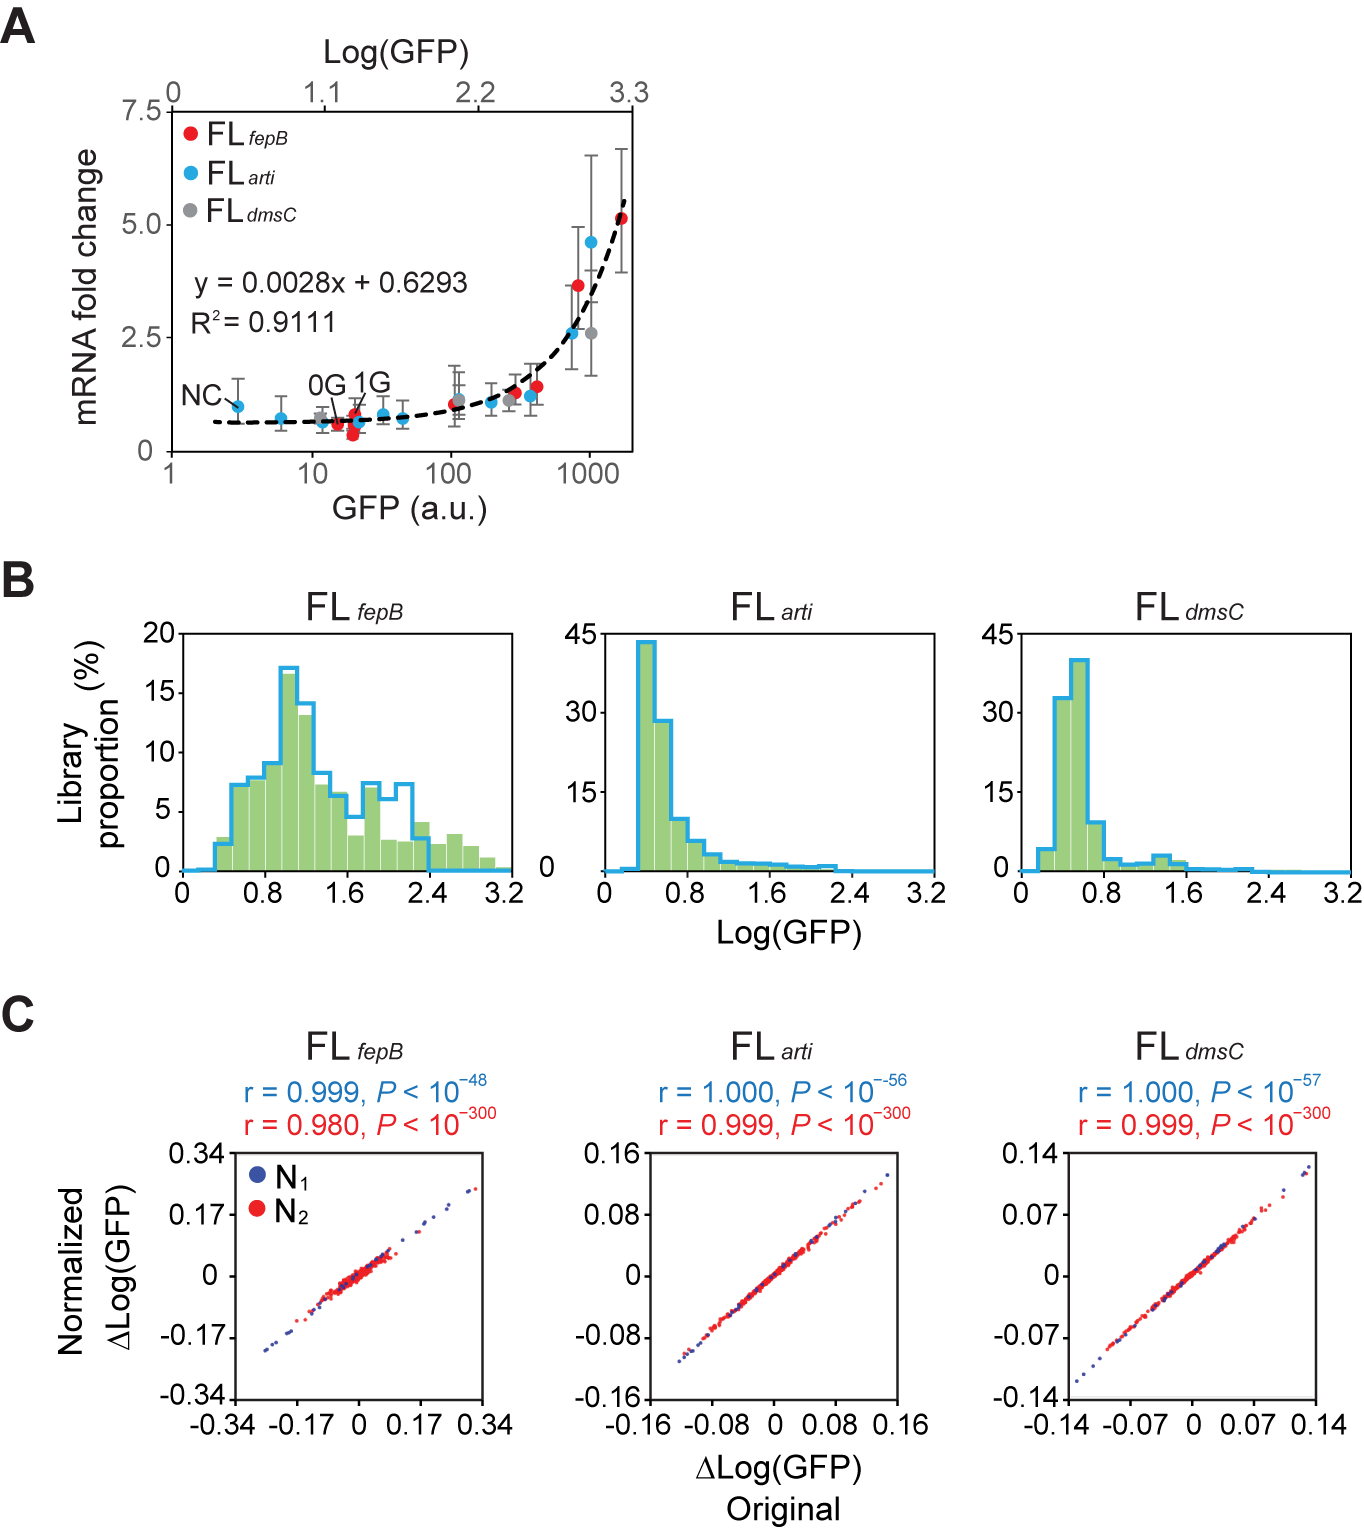


Supplemental Fig. S9. Influence of translation activity on transcript stability. (*A*) Relationship between cellular GFP fluorescence and mRNA levels. GFP fluorescence (arbitrary unit, a.u.) and mRNA levels (fold change) of 24 genotypes (mentioned in “Methods”) from FL*fepB*, FL*arti*, and FL*dmsC* were quantified by the cell sorter and qPCR, respectively. Two poly(U) RBS*fepB* variants, 0G and 1G appeared in Fig. 4A, are indicated. The mRNA level is shown as fold changes relative to pTK03, the negative control (NC). Dots indicate the means of four independent measurements. Bars show the confidence intervals of qPCR measurements expressed as 2− ∆∆Ct ± S.D., where S.D. indicates standard deviations. The relationship between GFP fluorescence in the arithmetic scale and mRNA levels fits a linear regression model (dashed line; *P* < 10-12). (*B*) Distribution of the fitness of genotypes without (green histograms) and with normalization (Log(GFP/mRNA); blue lines) with respect to mRNA levels predicted by the linear regression model. (*C*) Correlation (Pearson’s r, t-test) between the fitness effects (∆Log(GFP)) of single nucleotides (36 terms; N1) and pairwise epistasis (576 terms; N2) estimated based on the original and normalized fitness datasets.


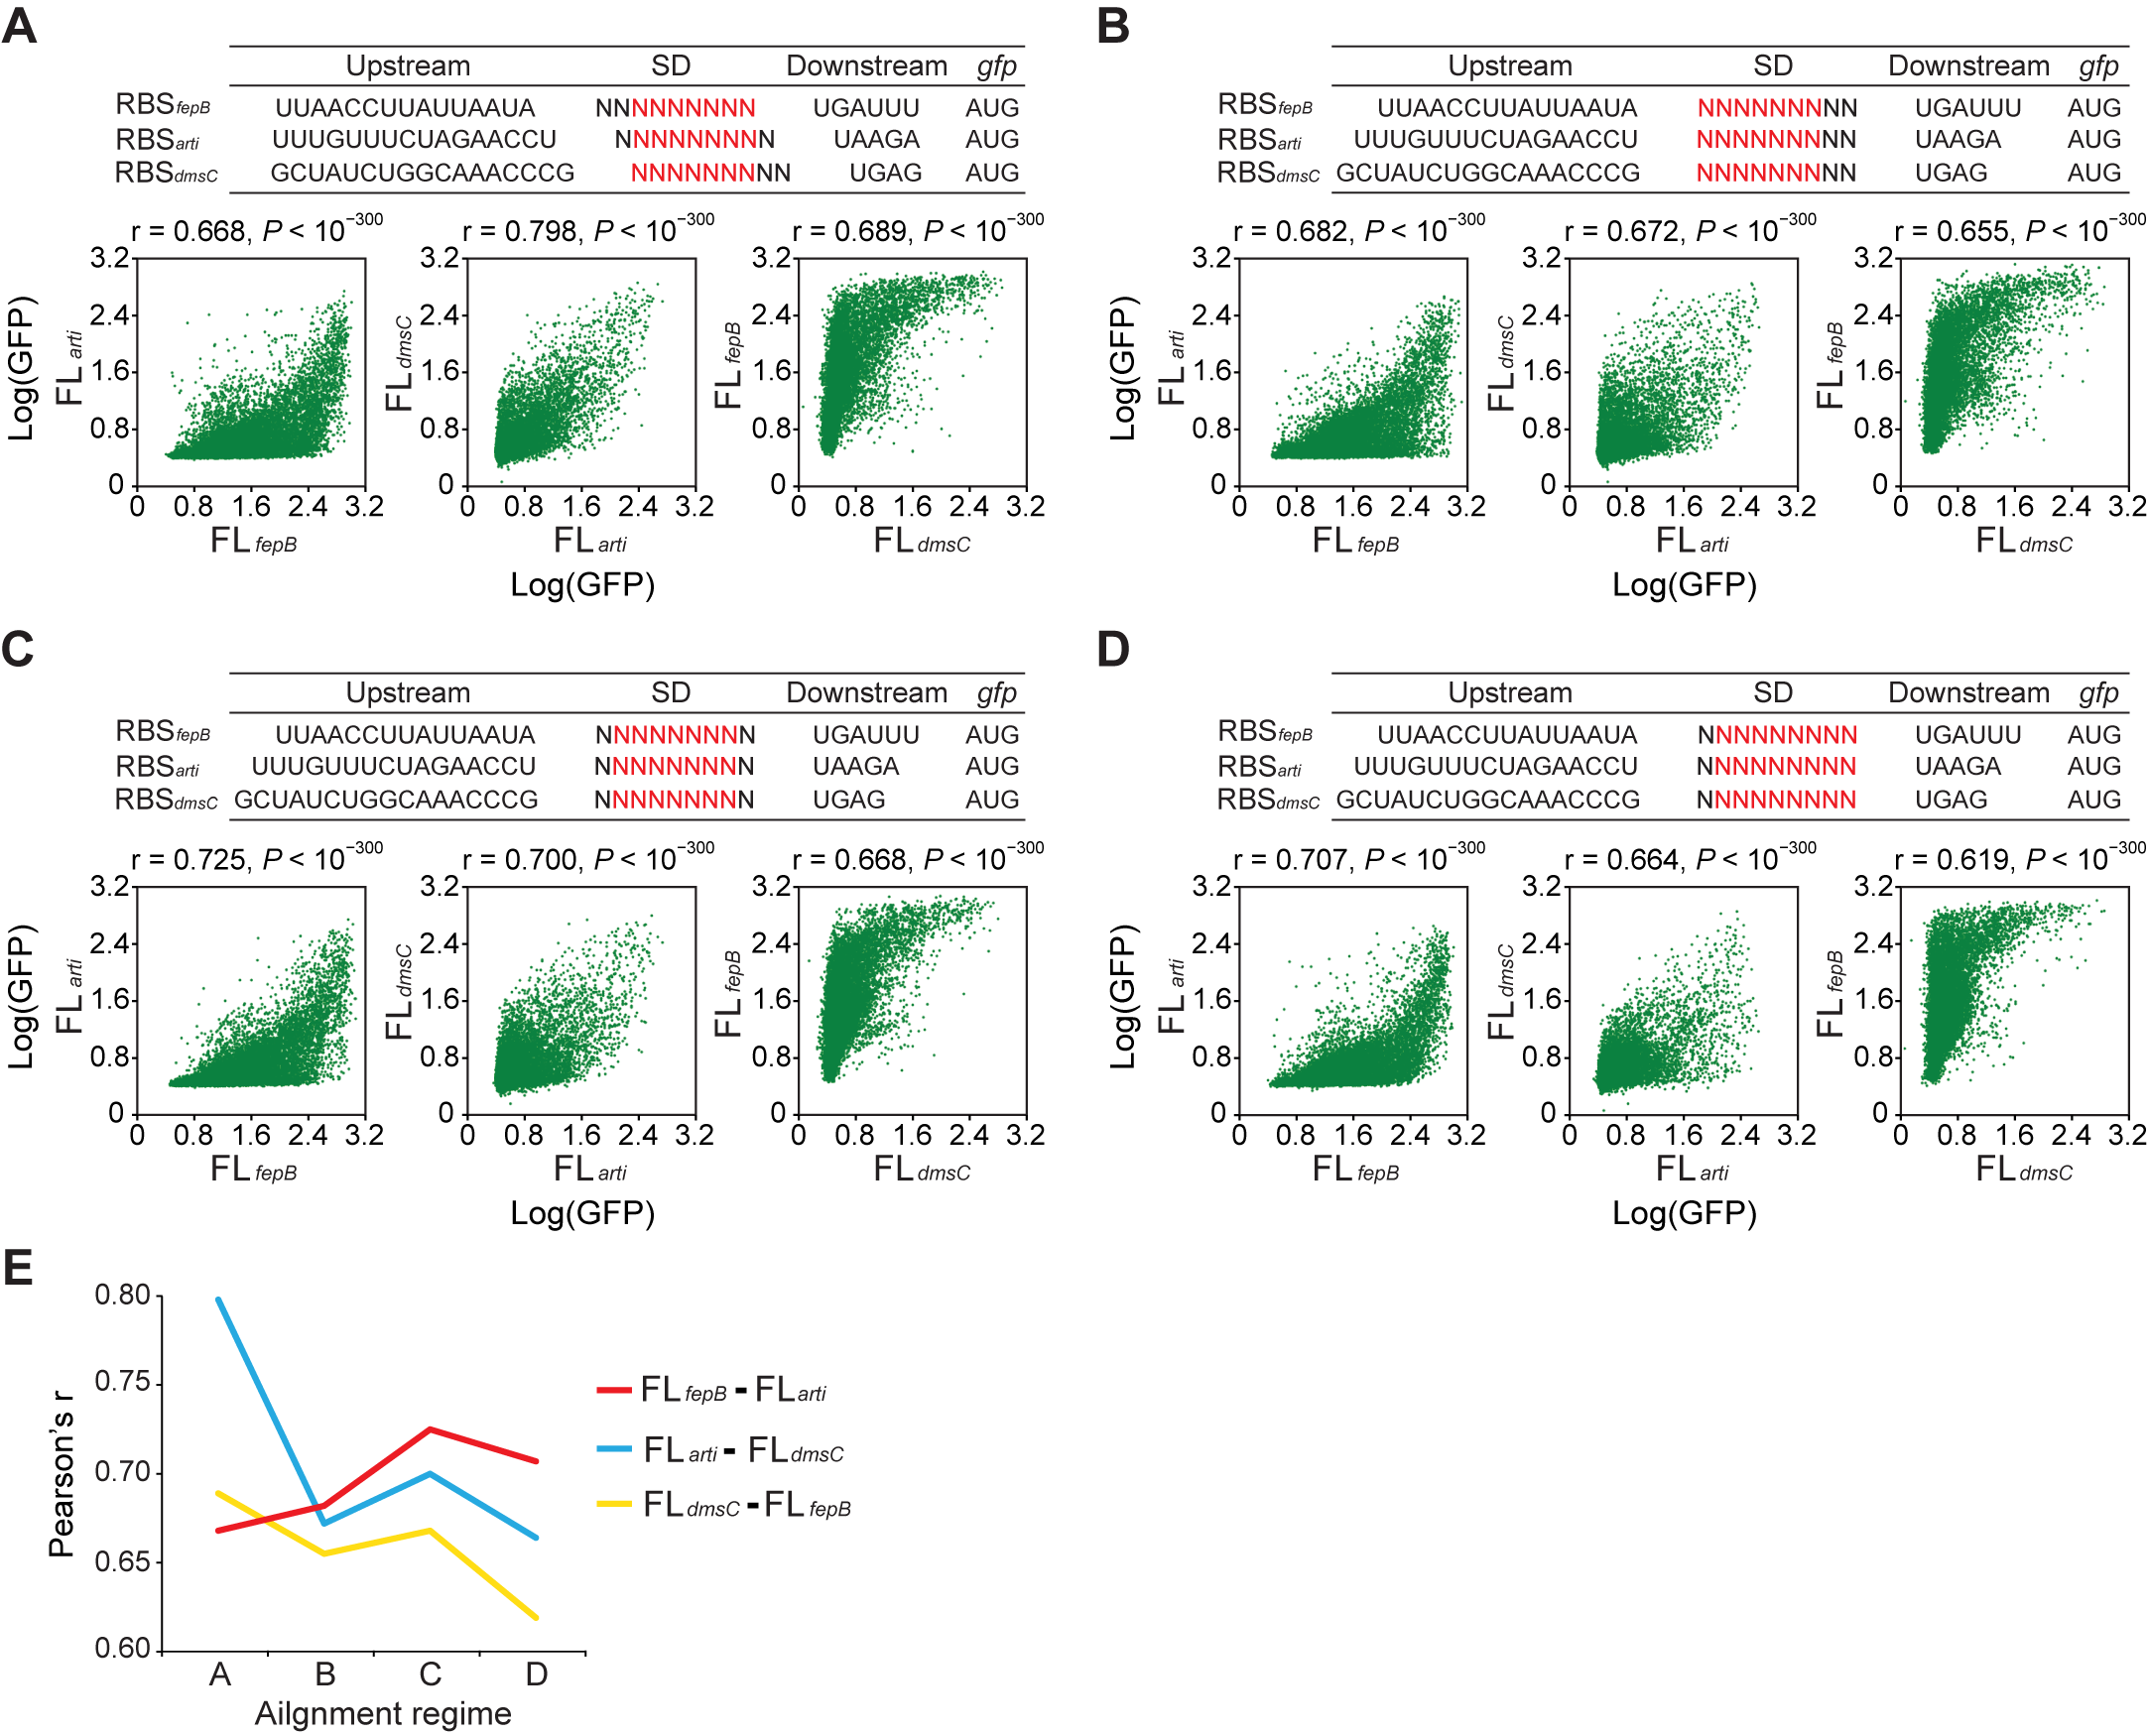


Supplemental Fig. S10. Influence of sequence alignment on estimating the correlation (Pearson’s r, t-test) of SD G-P associations between fitness landscapes. (*A-D*) Besides the RBS context and SD:aSD base pairing, the distance between the SD:aSD pairing region and the *gfp* start codon may alter the mRNA-ribosome binding, hence affecting the fitness (Log(GFP)) of SD genotypes. To examine this factor, the sequence of genotypes in each fitness landscape are aligned either relative to the start codon (*A*) or in terms of the left edge (*B*), the center (*C*), or the right edge (*D*) of the 9-nt SD region. Based on the sequence identity in the 7-nt overlapping positions (highlighted in red), genotypes in each fitness landscape are grouped into 47 genotypic subsets, each subset consisting of up to 16 genotypes. The mean fitness of each 47 genotypic subset is computed and compared between fitness landscapes. (*E*) The correlations (Pearson’s r) of SD G-P associations between fitness landscapes under the four aforementioned sequence alignment regimes.


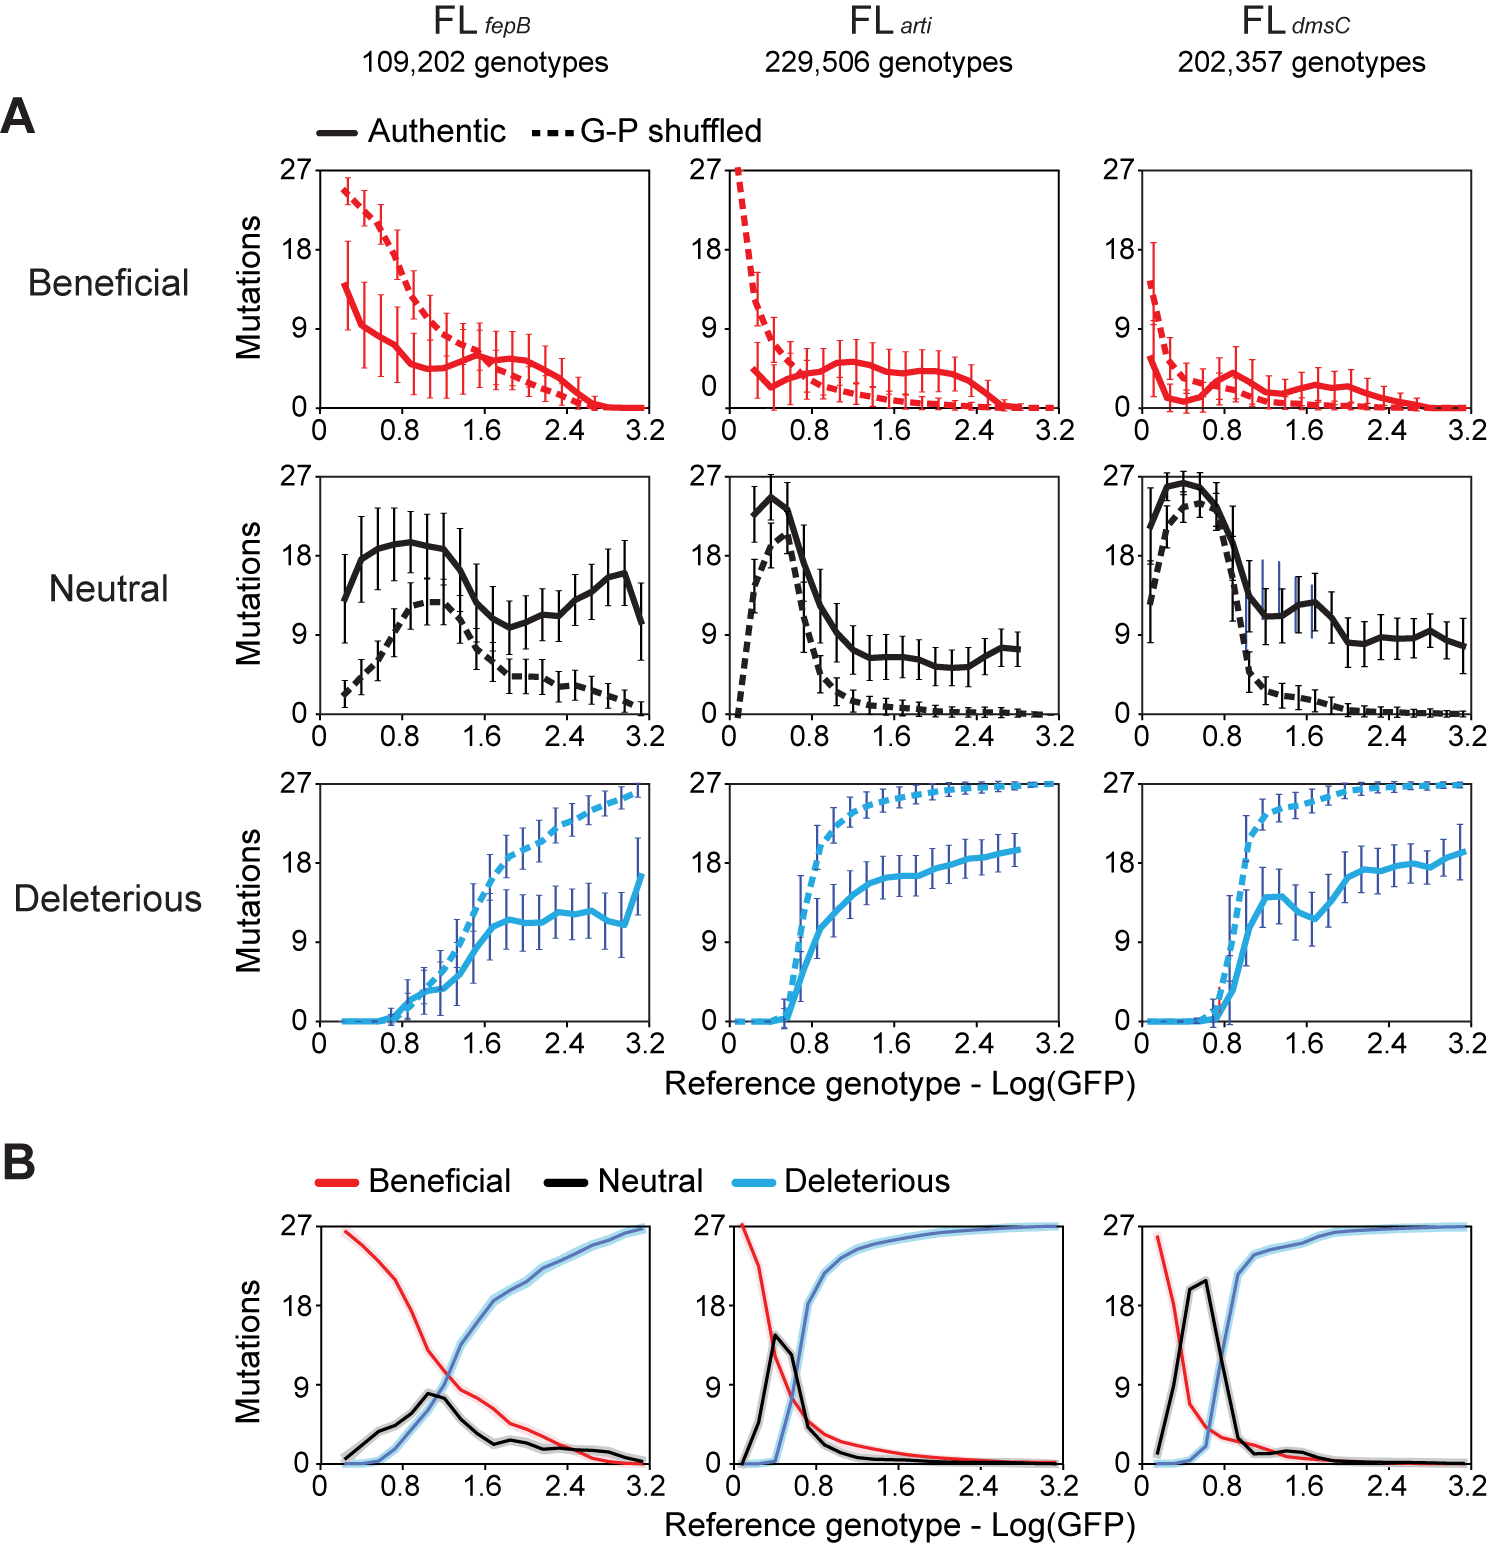


Supplemental Fig. S11. G-P correlation and the distribution of mutational effects. (*A*) Relationship between the fitness of a genotype and the amount of beneficial, neutral, and deleterious mutations in this genetic background in the authentic fitness landscapes or the representative G-P shuffled fitness landscapes (identical to Fig. 2B). The 27 point mutations a genotype would acquire are assigned into beneficial, neutral, and deleterious categories based on an operational cutoff defined by two-fold sort-seq measurement errors (FL*fepB* = 0.336, FL*arti* = 0.216, and FL*dmsC* = 0.396). Lines and bars indicate group means and standard deviations, respectively. (*B*) Summary of the relationships between the fitness of genetic backgrounds and the amount of beneficial, neutral, and deleterious mutations in the 10,000 G-P-shuffled fitness landscapes. The 27 point mutations a genotype would acquire are classified using sort-seq measurement errors (FL*fepB* = 0.168, FL*arti* = 0.108, and FL*dmsC* = 0.198) as the cutoff. Thin dark lines indicate the averaged trend of 10,000 G-P shuffled landscapes, and the halo zones show the range of variation. (*A, B*) Genotypes are ranked by fitness and grouped into 20 equal-size bins, and only genotypes with their 27 single-mutation neighbors fully characterized are considered.


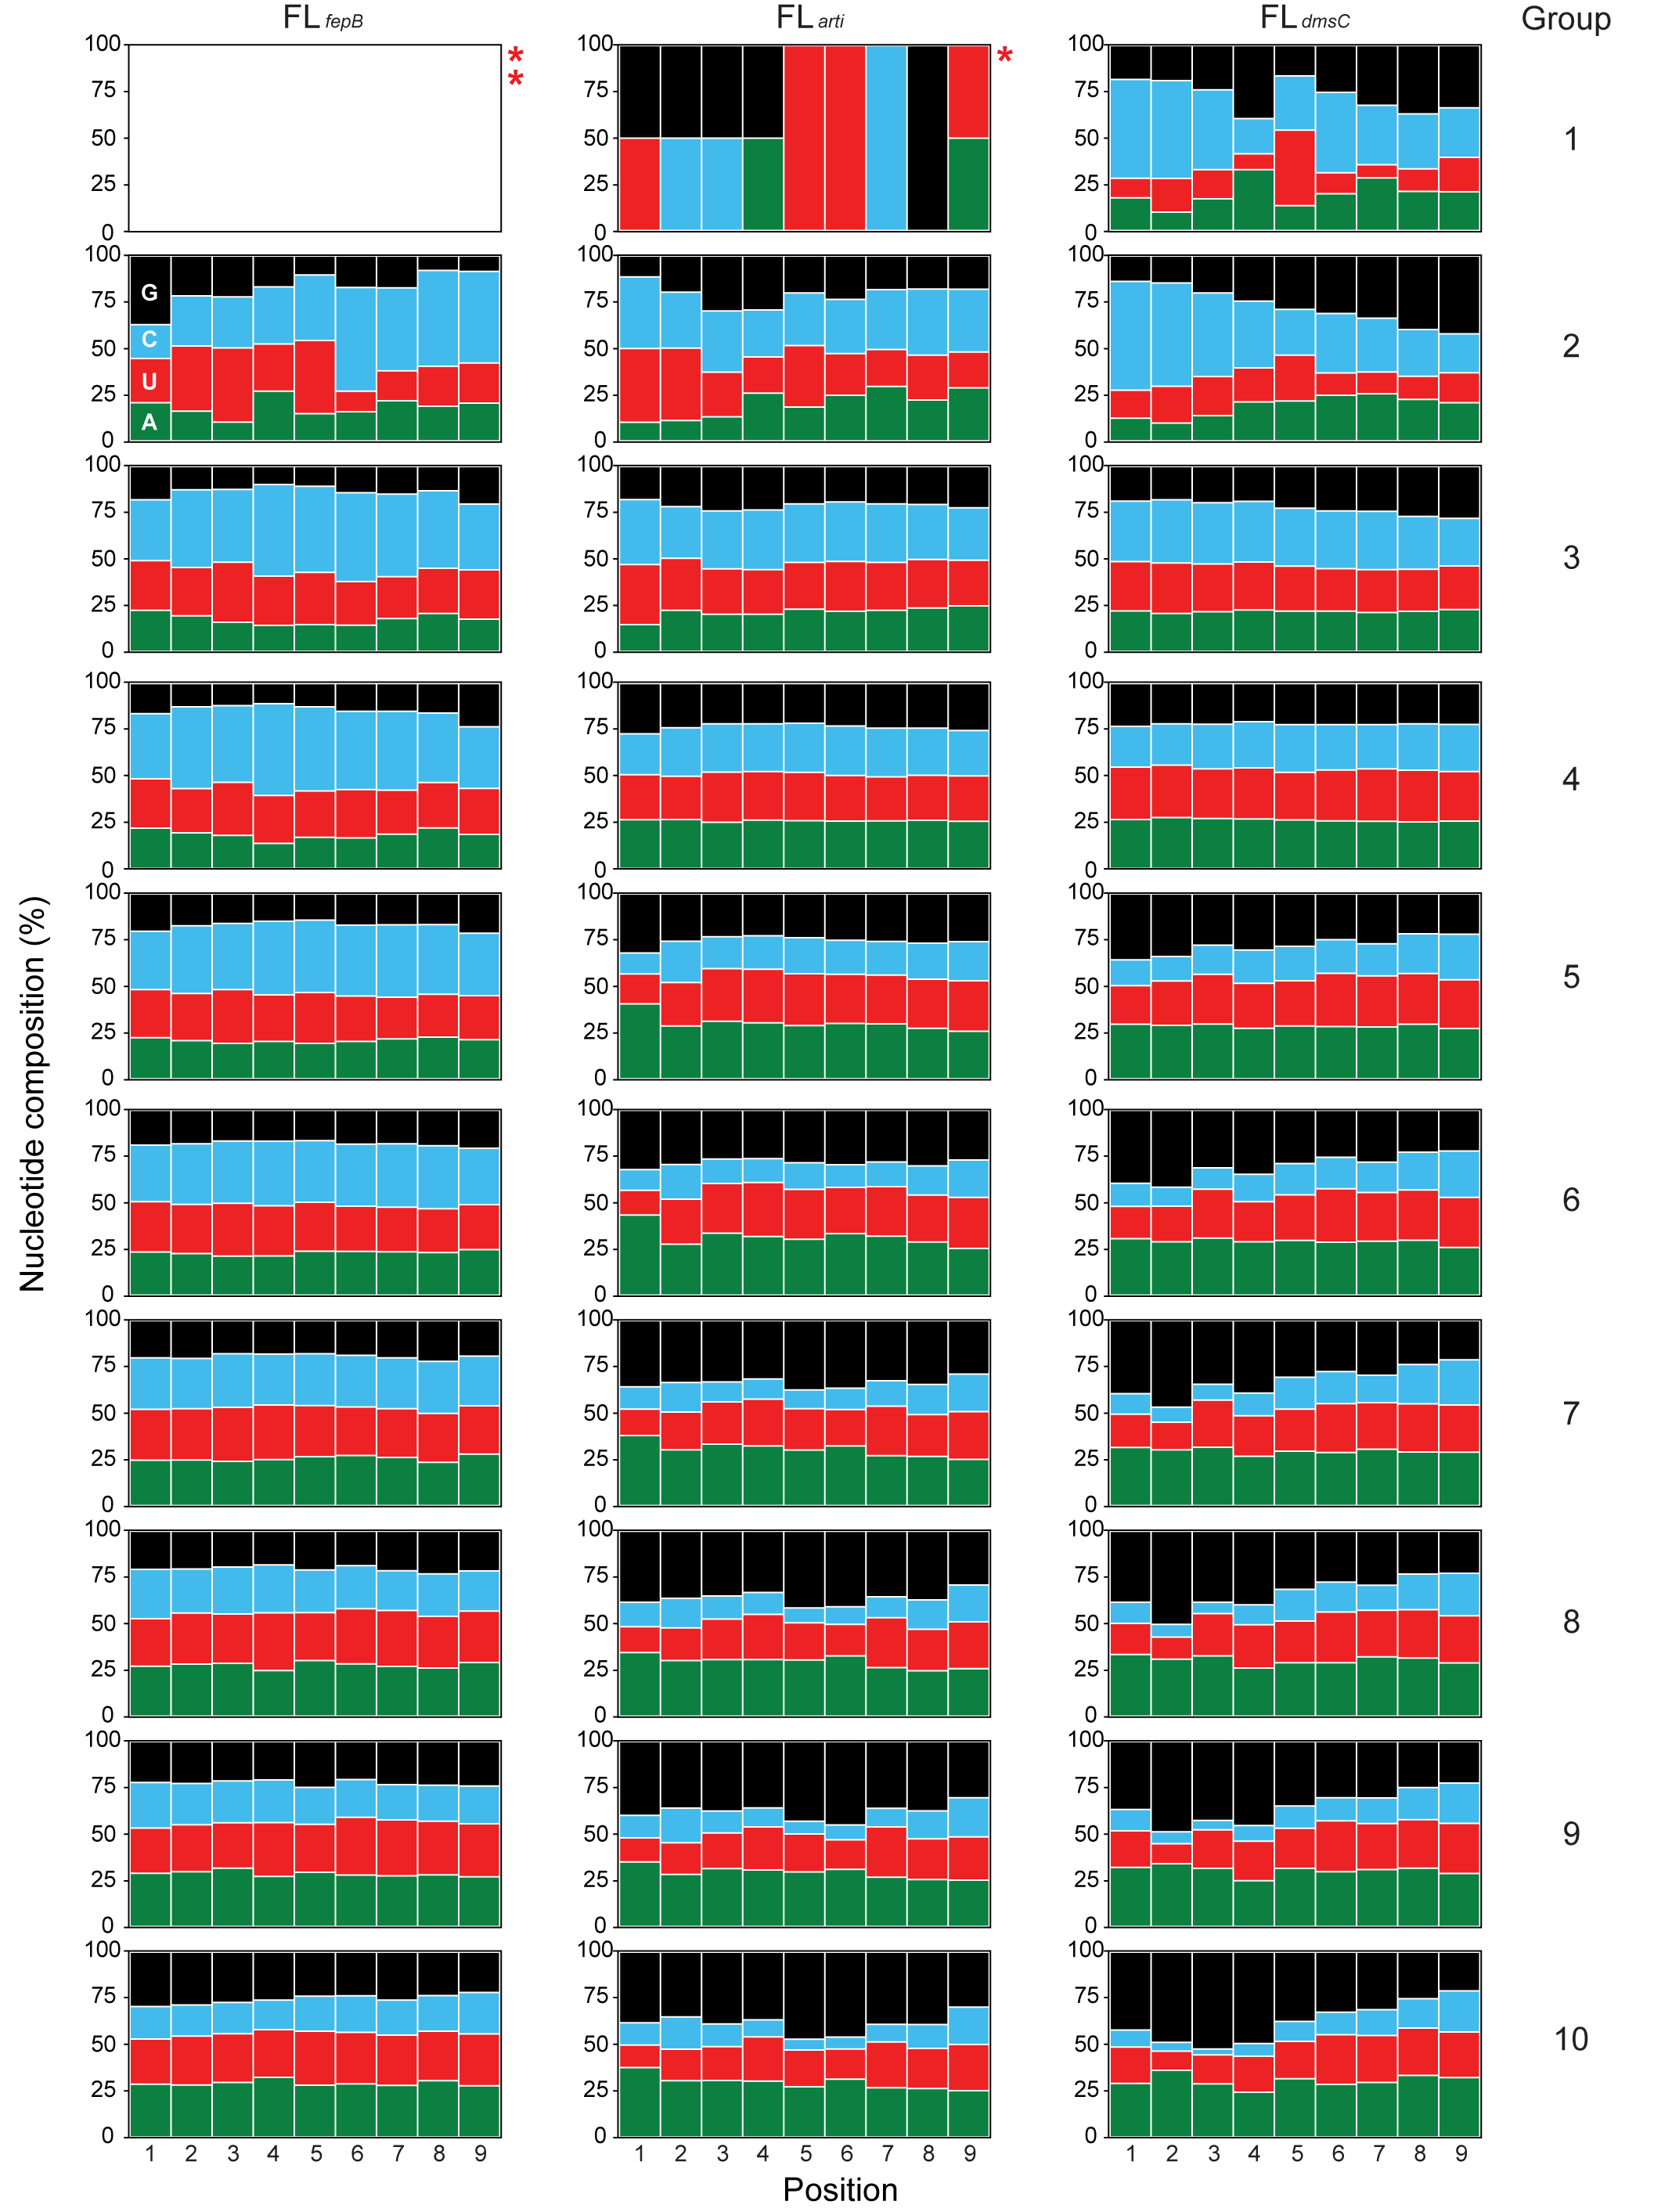


Supplemental Fig. S12. Nucleotide composition of genotypes belonging to the first to the tenth fitness-ranked groups (Log(GFP) = 0-1.6) in FL*fepB*, FL*arti*, and FL*dmsC*. Groups containing zero or 1-3 genotypes are indicated by two and one red asterisks, respectively.


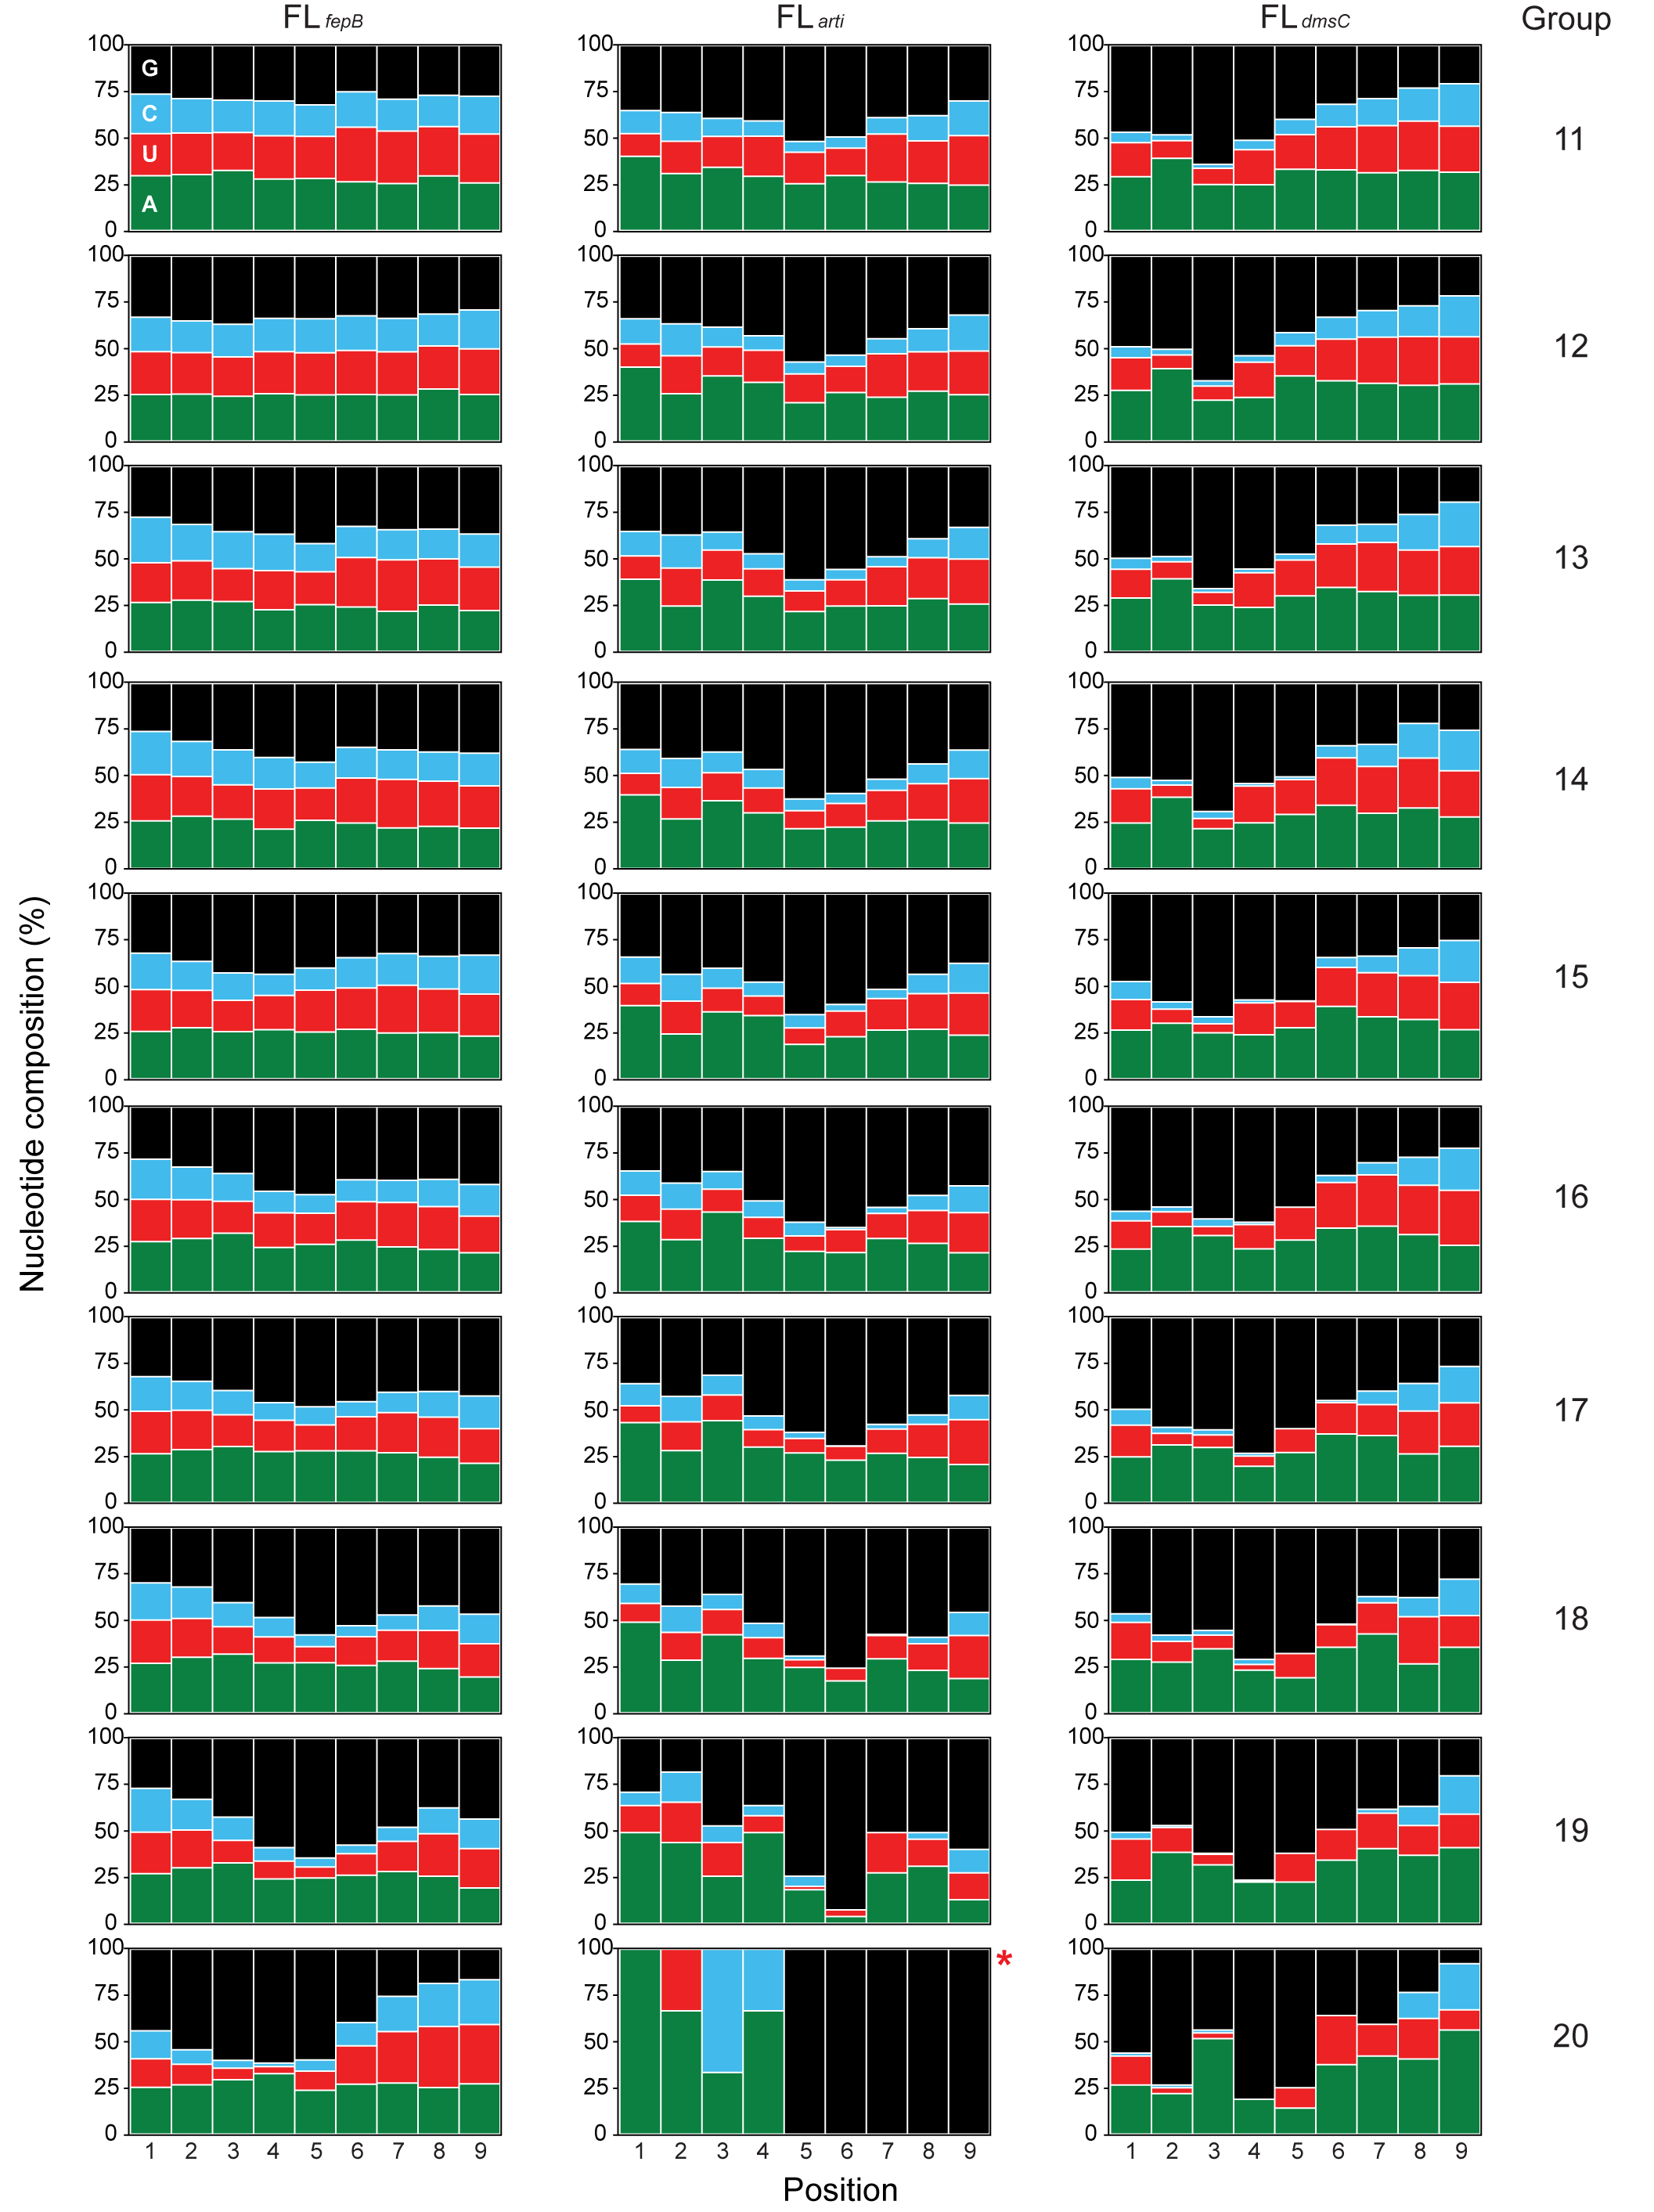


Supplemental Fig. S13. Nucleotide composition of genotypes belonging to the eleventh to the twentieth fitness-ranked groups (Log(GFP) = 1.6-3.2) in FL*fepB*, FL*arti*, and FL*dmsC*. Groups containing zero or 1-3 genotypes are indicated by two and one red asterisks, respectively.


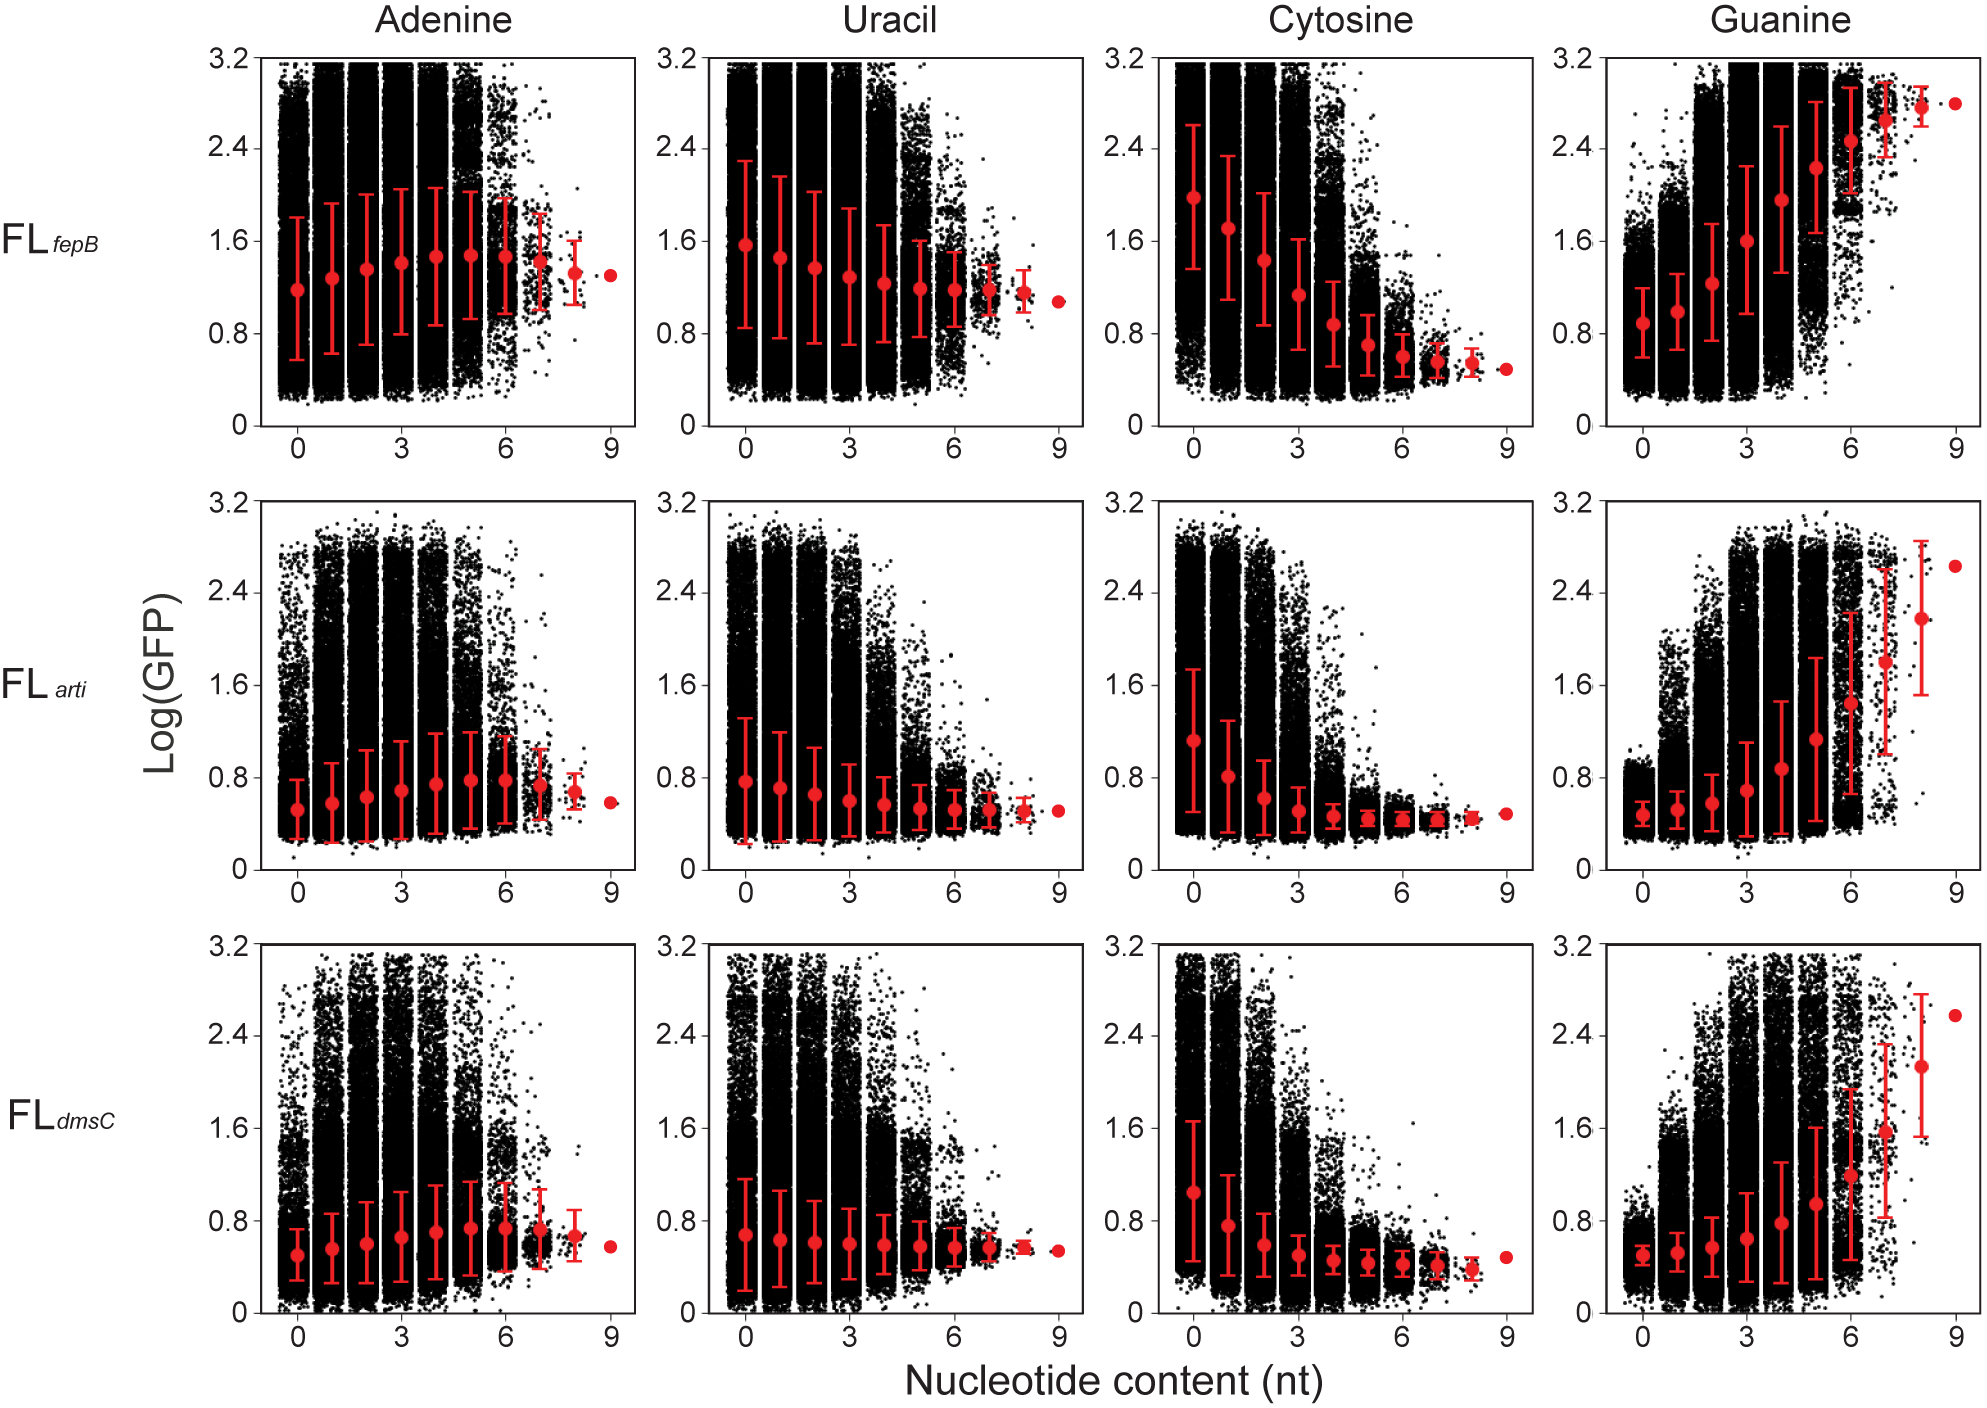


Supplemental Fig. S14. Relationship between the nucleotide content and the fitness of genotypes. Genotypes in each fitness landscape are divided into 10 groups (0 to 9) in terms of the amount of adenine, uracil, guanine, and cytosine. Red dots and bars indicate the group means and standard deviations of fitness (Log(GFP)), respectively.


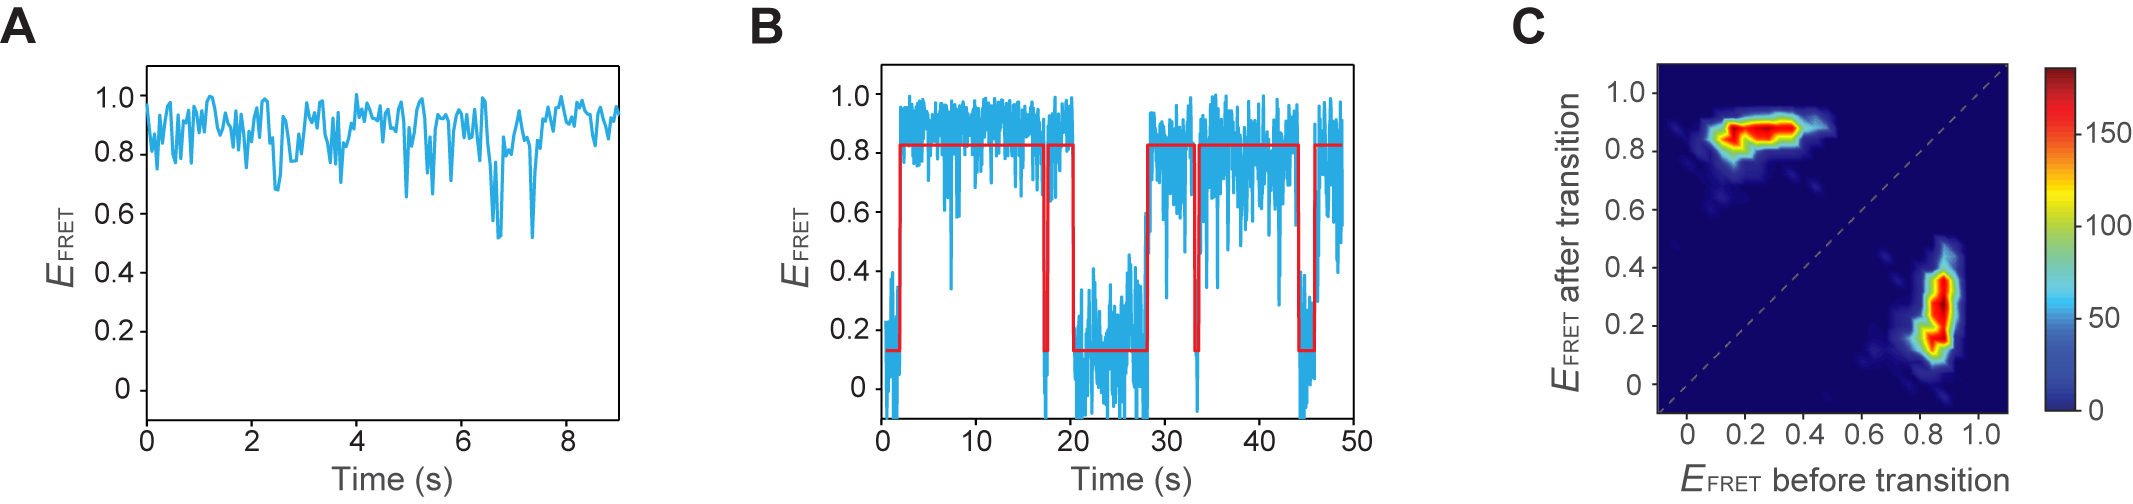


Supplemental Fig. S15. RBS-30S subunit binding kinetics. (*A, B*) Representative time traces showing changes in the fluorescence resonance energy transfer efficiency (*E*FRET) of a synthetic RBS (1G variant in Fig. 4A) in the (*A*) absence or (*B*) presence of the 30S subunit. (*B*) The red line indicates the best fitted time trace identifying the apparent 30S-bound state (*E*FRET ~0.1) and the unbound state (*E*FRET ~0.8). (*C*) The transition density plot of the same genotype in the presence of the 30S subunit. Data were extracted from the fitted line in (*B*) and organized in terms of *E*FRET values before and after each state transition.


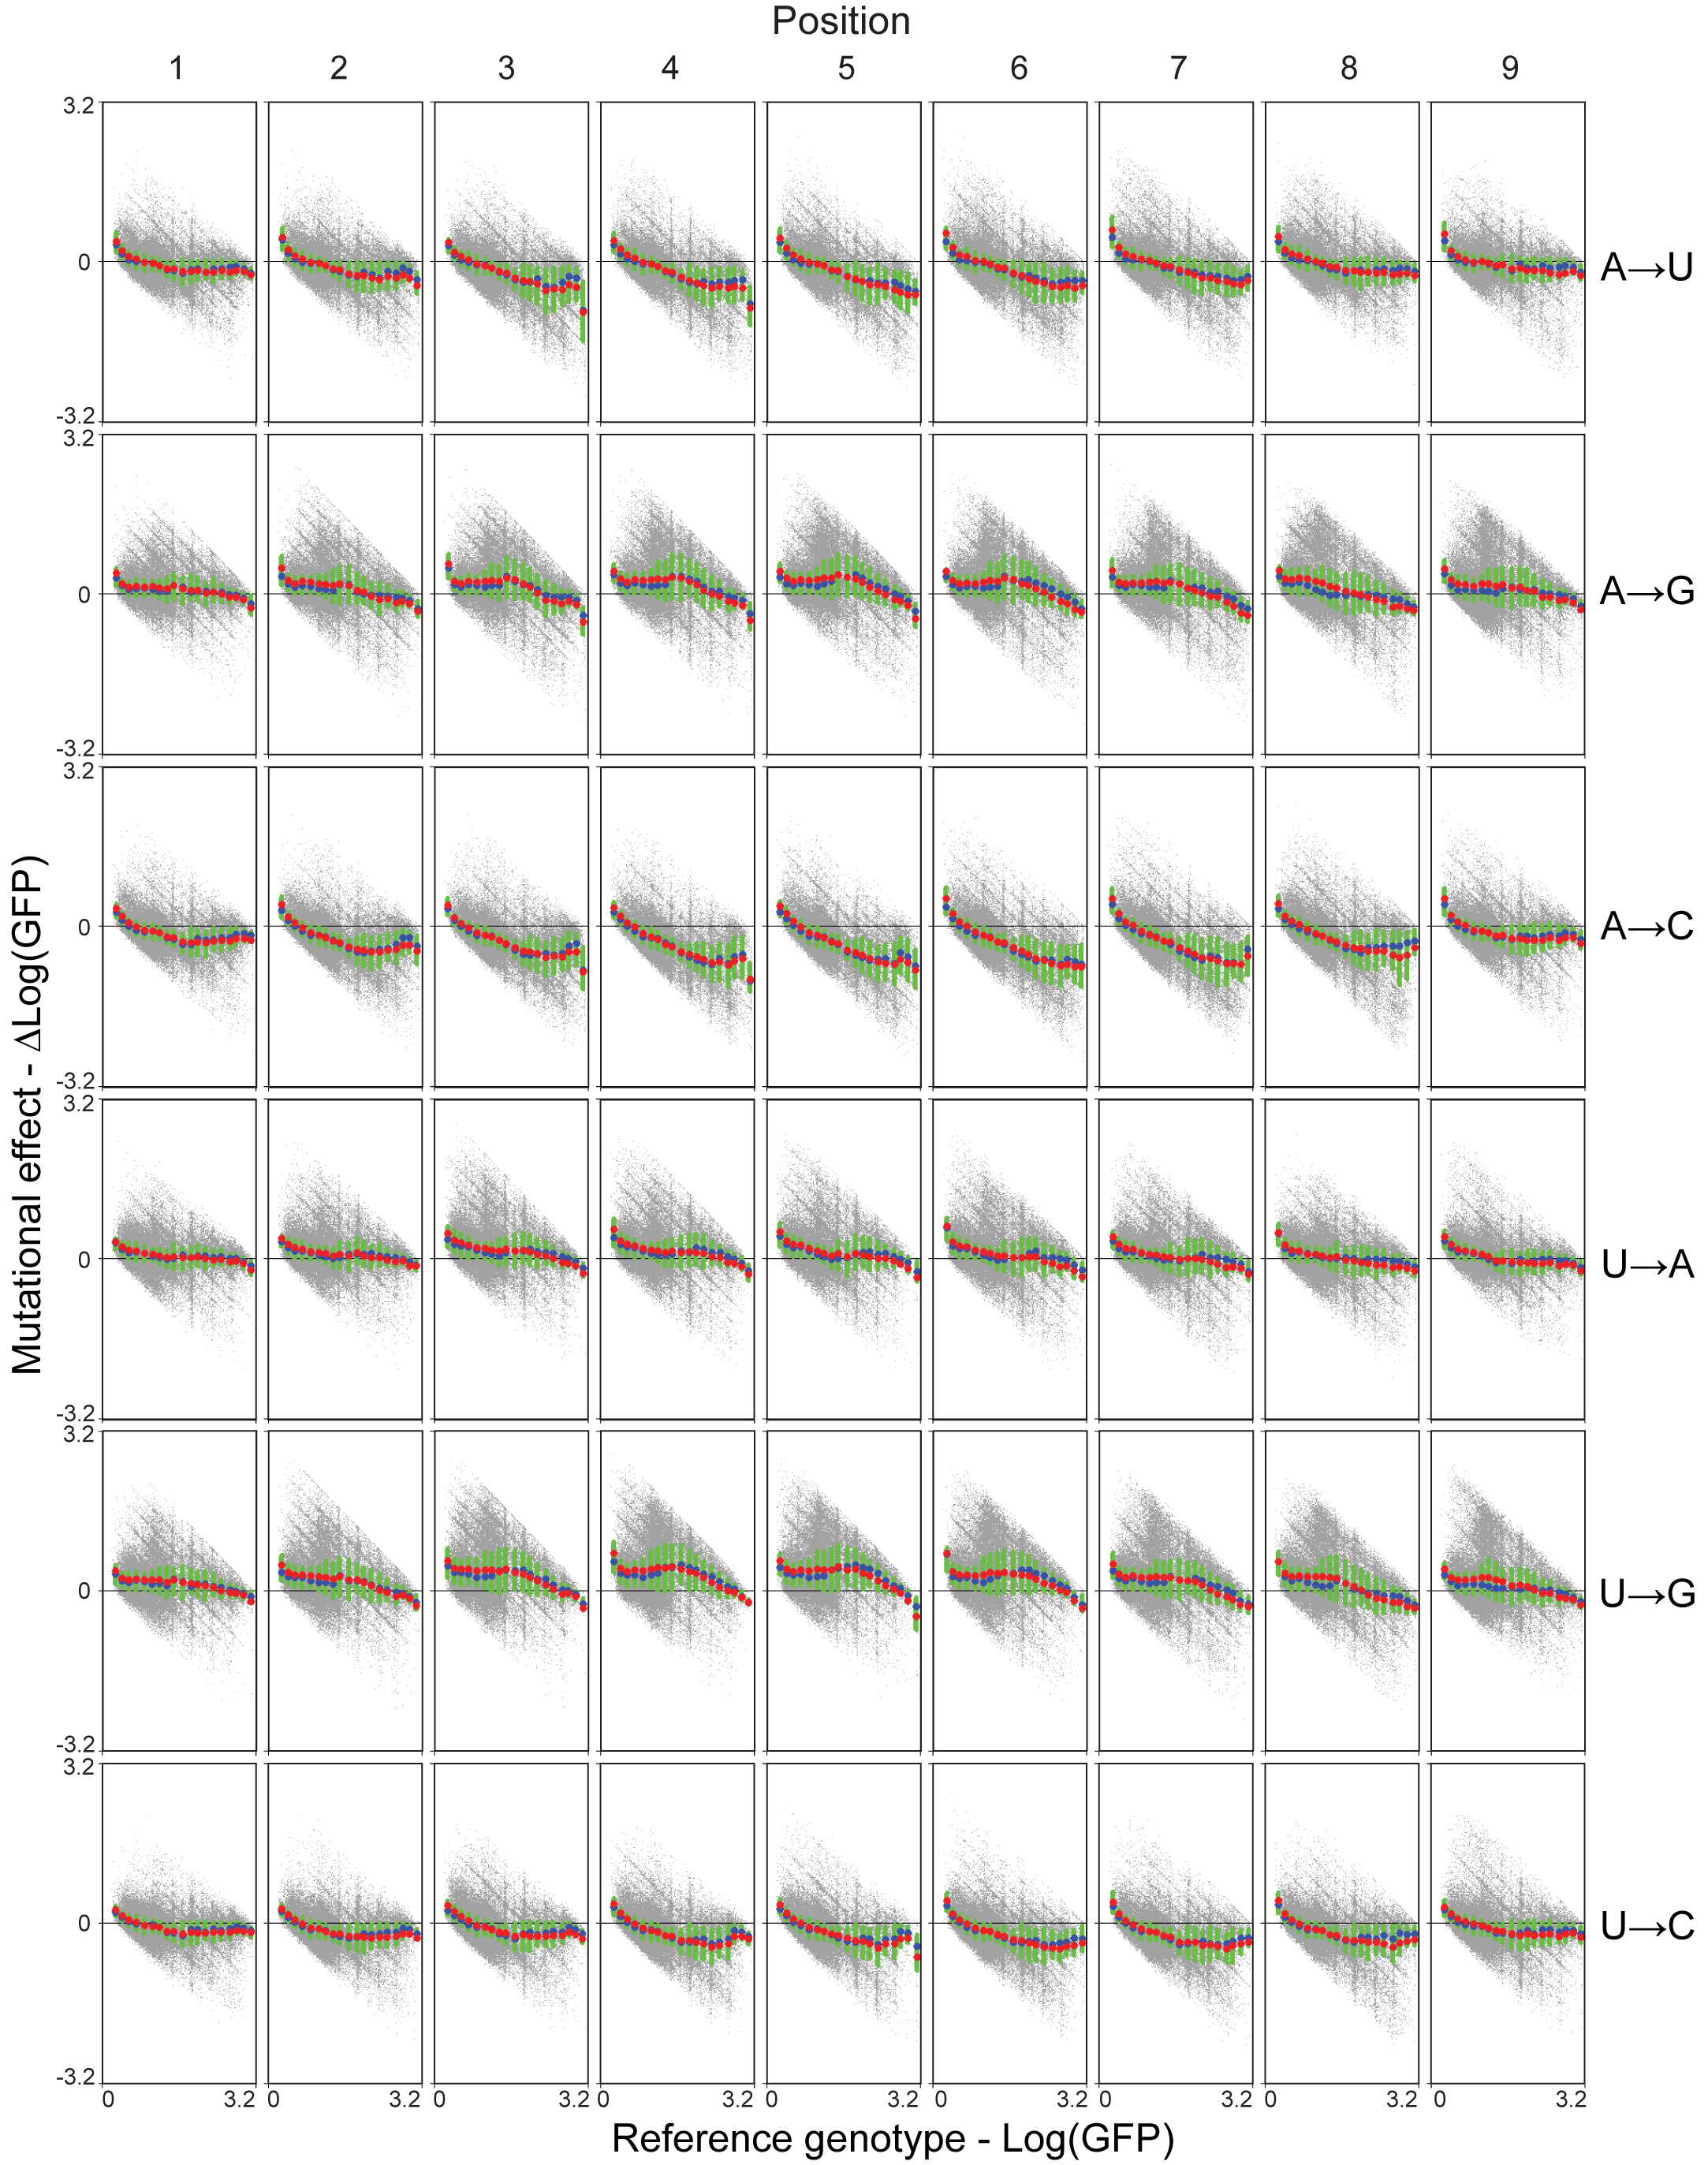


Supplemental Fig. S16. Fitness effects of A→U, A→G, A→C, U→A, U→G, and U→C mutations in FL*fepB*. The relationships between the fitness (Log(GFP)) of a genotype and the fitness effects of A→U, A→G, A→C, U→A, U→G, and U→C mutations in this genetic background are separately examined in terms of the nine nucleotide positions of SD. In each panel, genotypes are ranked by fitness and grouped into 20 equal-size bins. Group means, medians, and interquartile ranges are shown as red circles, blue circles, and green bars, respectively.


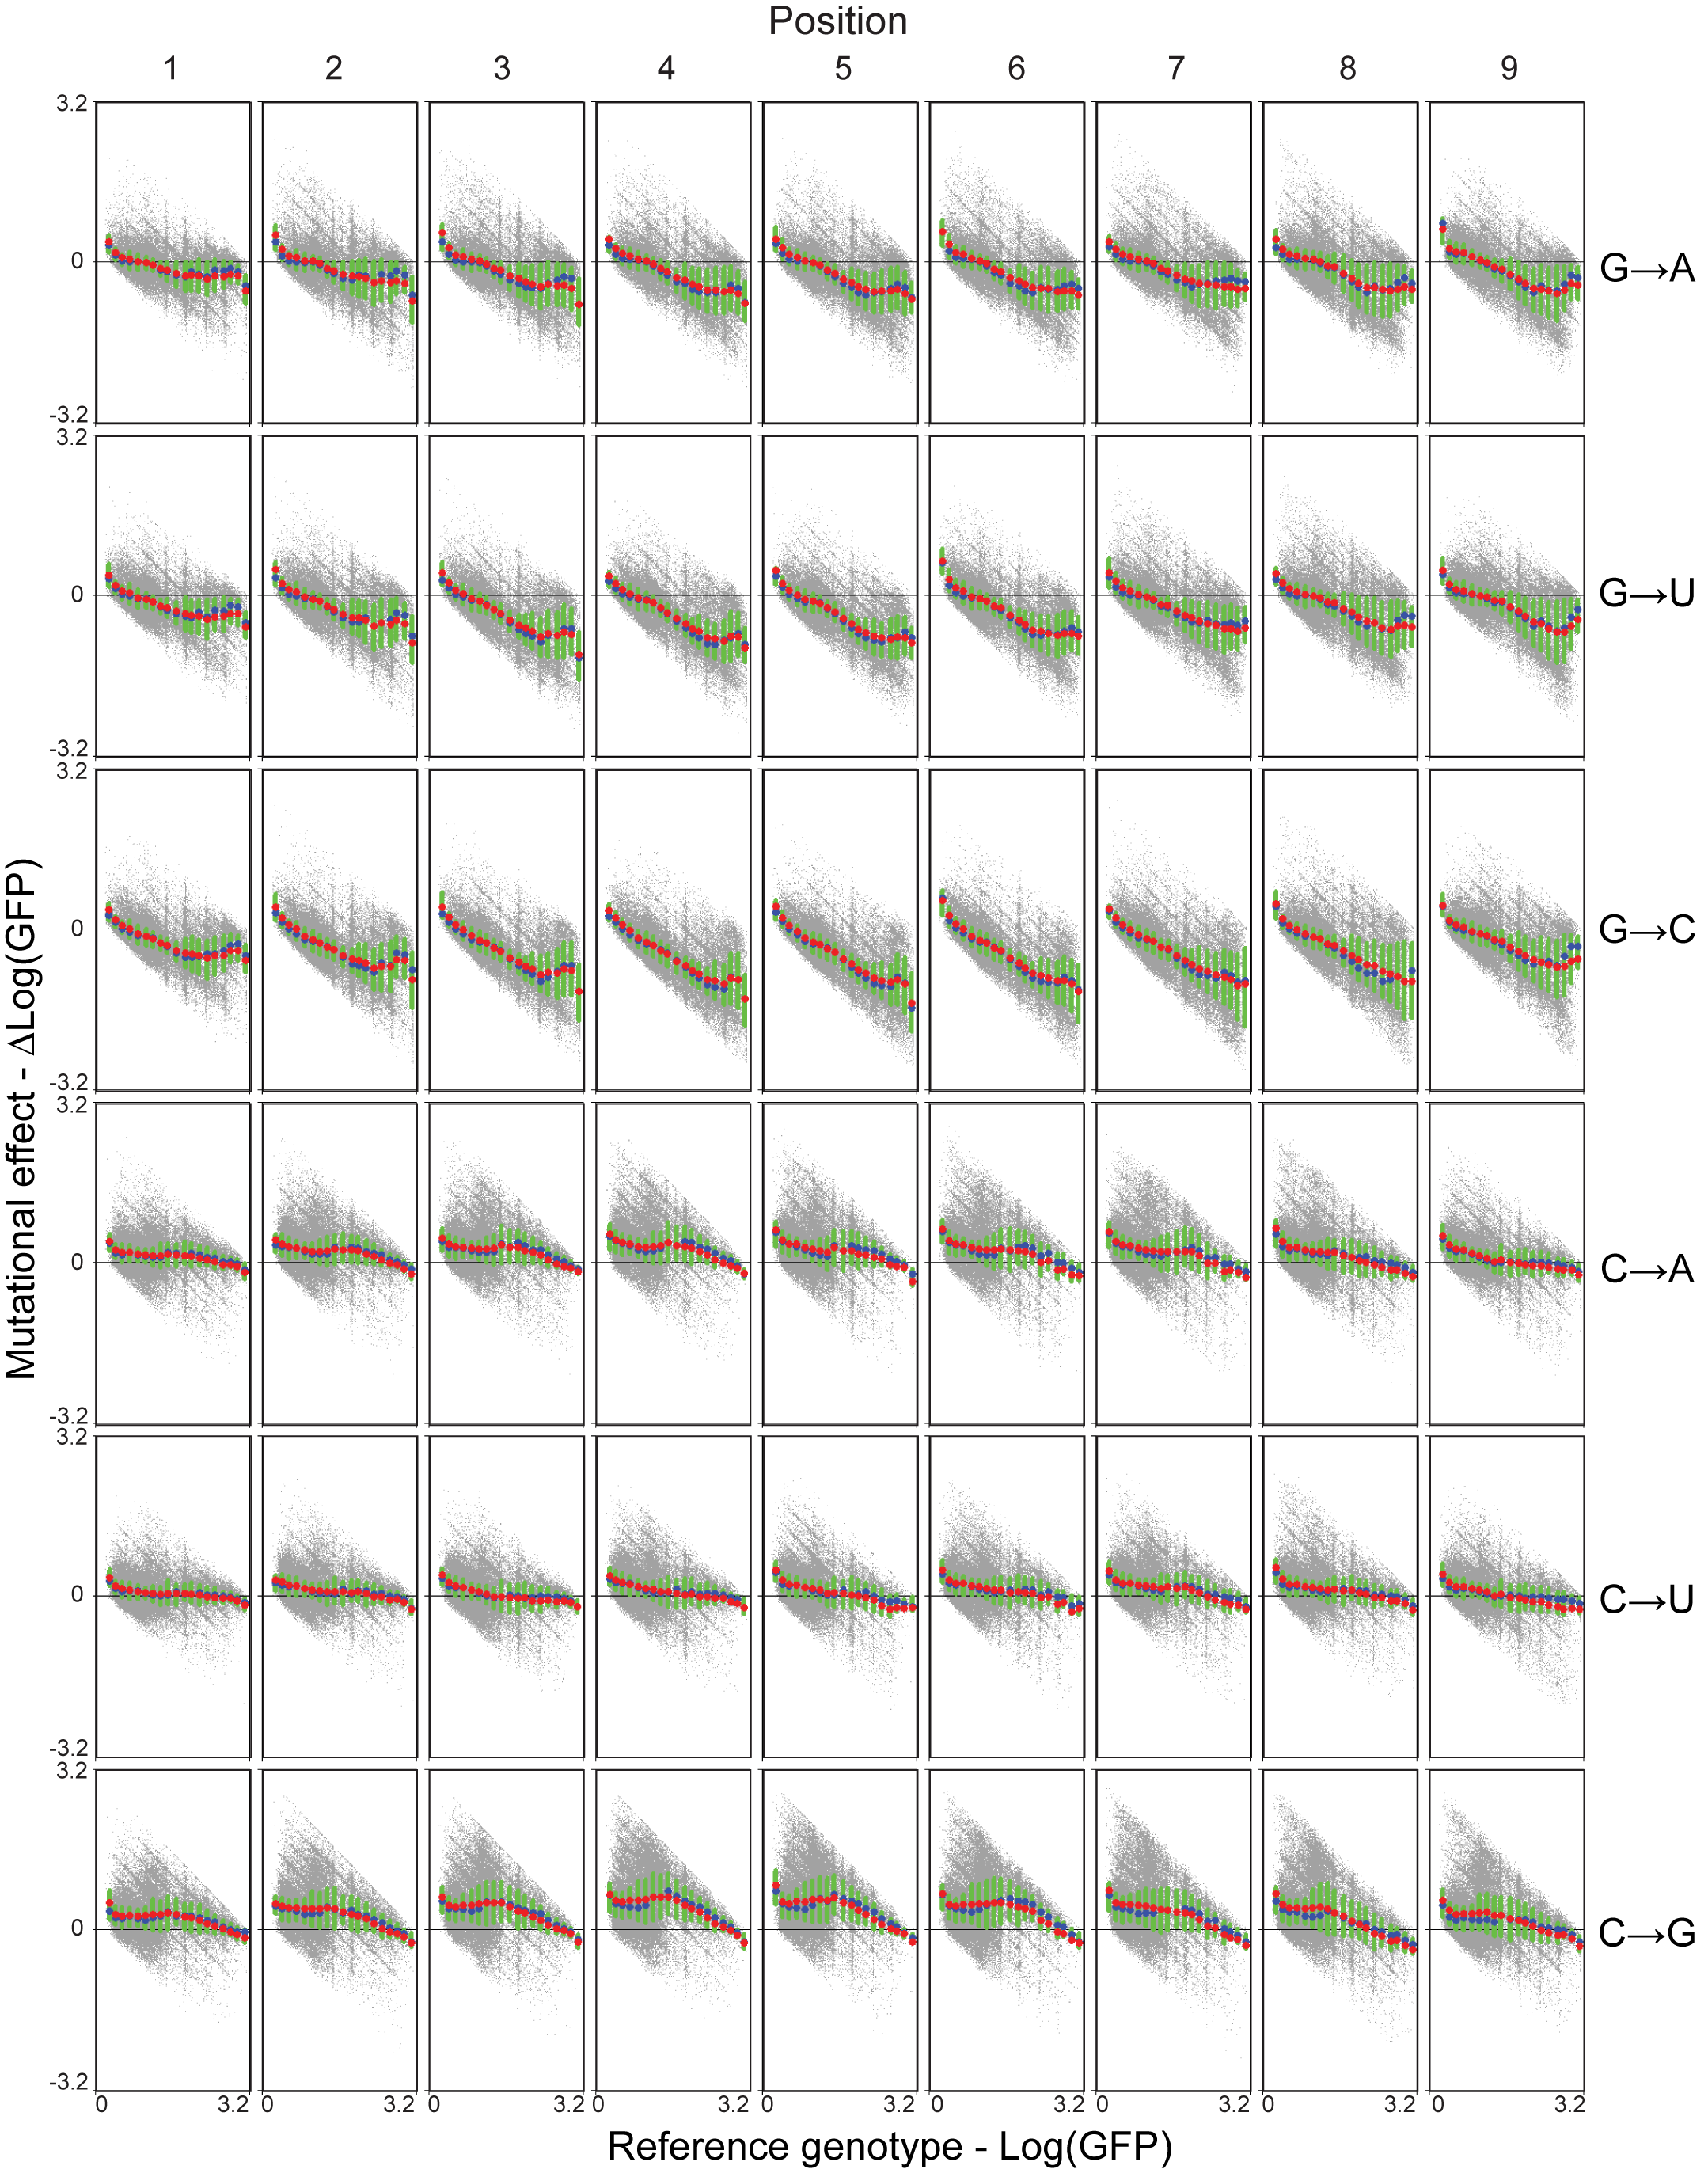


Supplemental Fig. S17. Fitness effects of G→A, G→U, G→C, C→A, C→U, and C→G mutations in FL*fepB*. The relationships between the fitness (Log(GFP)) of a genotype and the fitness effects of G→A, G→U, G→C, C→A, C→U, and C→G mutations in this genetic background are separately examined in terms of the nine nucleotide positions of SD. In each panel, genotypes are ranked by fitness and grouped into 20 equal-size bins. Group means, medians, and interquartile ranges are shown as red circles, blue circles, and green bars, respectively.


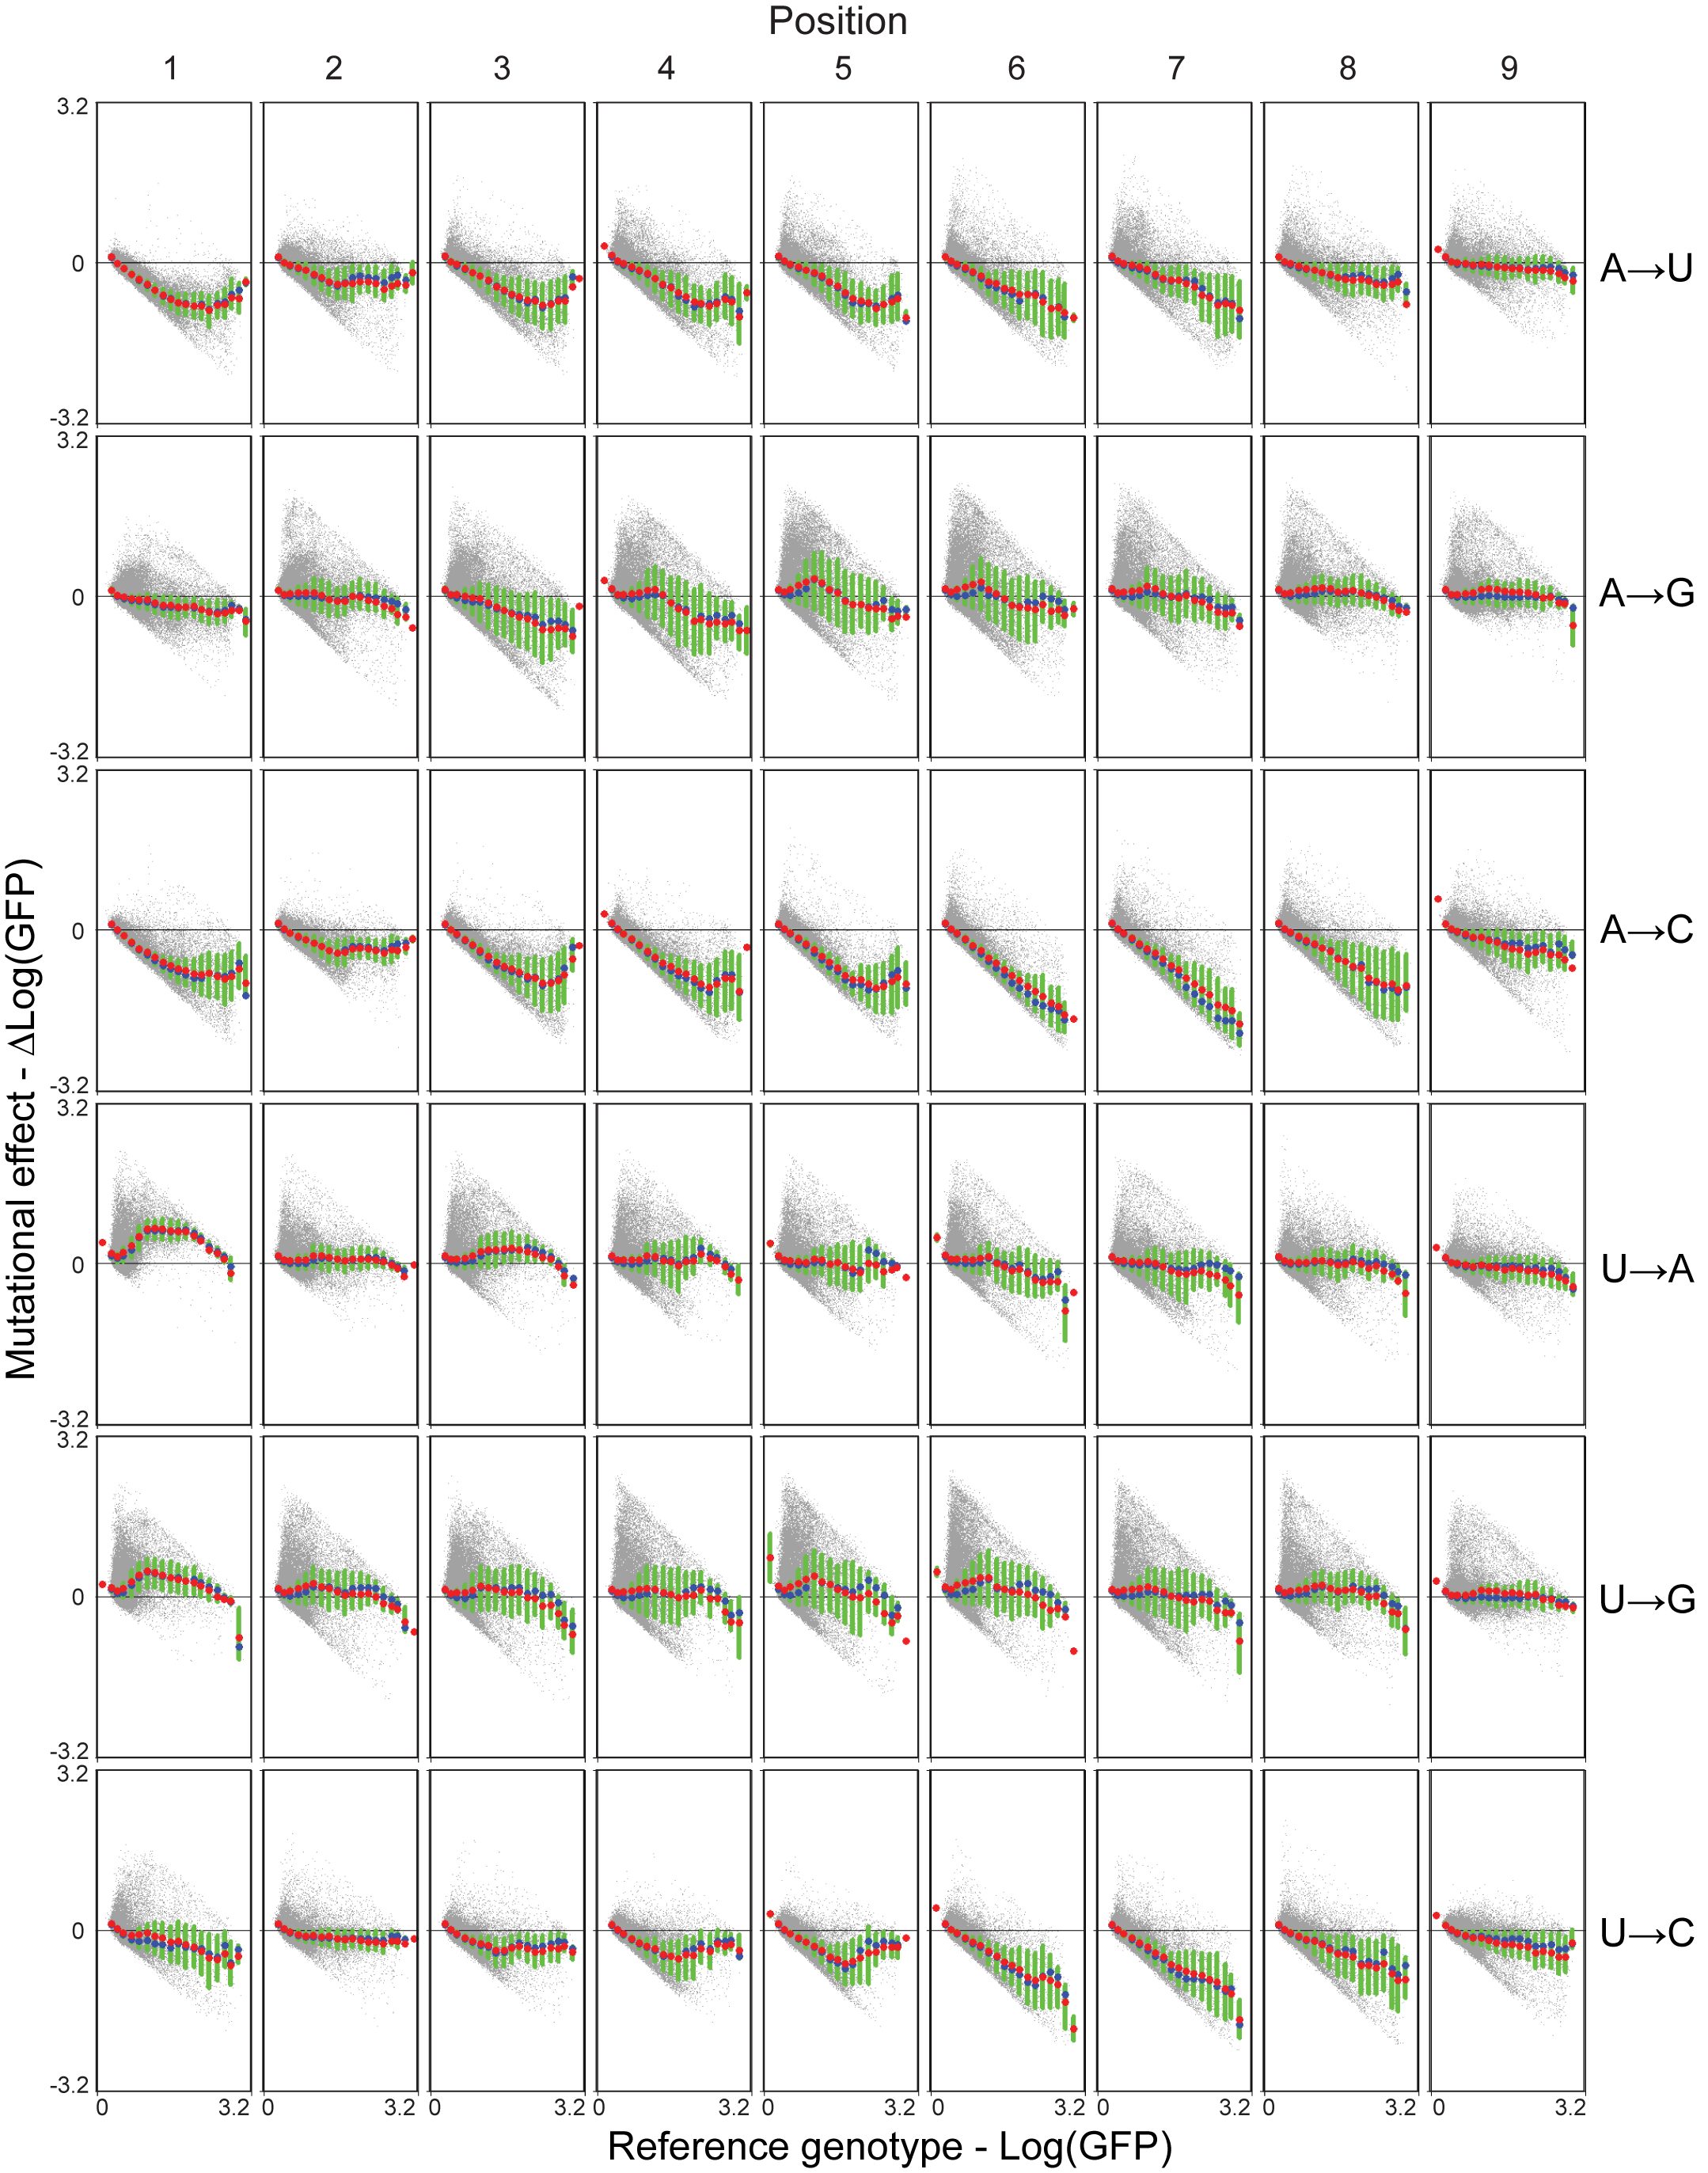


Supplemental Fig. S18. Fitness effects of A→U, A→G, A→C, U→A, U→G, and U→C mutations in FL*arti*. The relationships between the fitness (Log(GFP)) of a genotype and the fitness effects of A→U, A→G, A→C, U→A, U→G, and U→C mutations in this genetic background are separately examined in terms of the nine nucleotide positions of SD. In each panel, genotypes are ranked by fitness and grouped into 20 equal-size bins. Group means, medians, and interquartile ranges are shown as red circles, blue circles, and green bars, respectively.


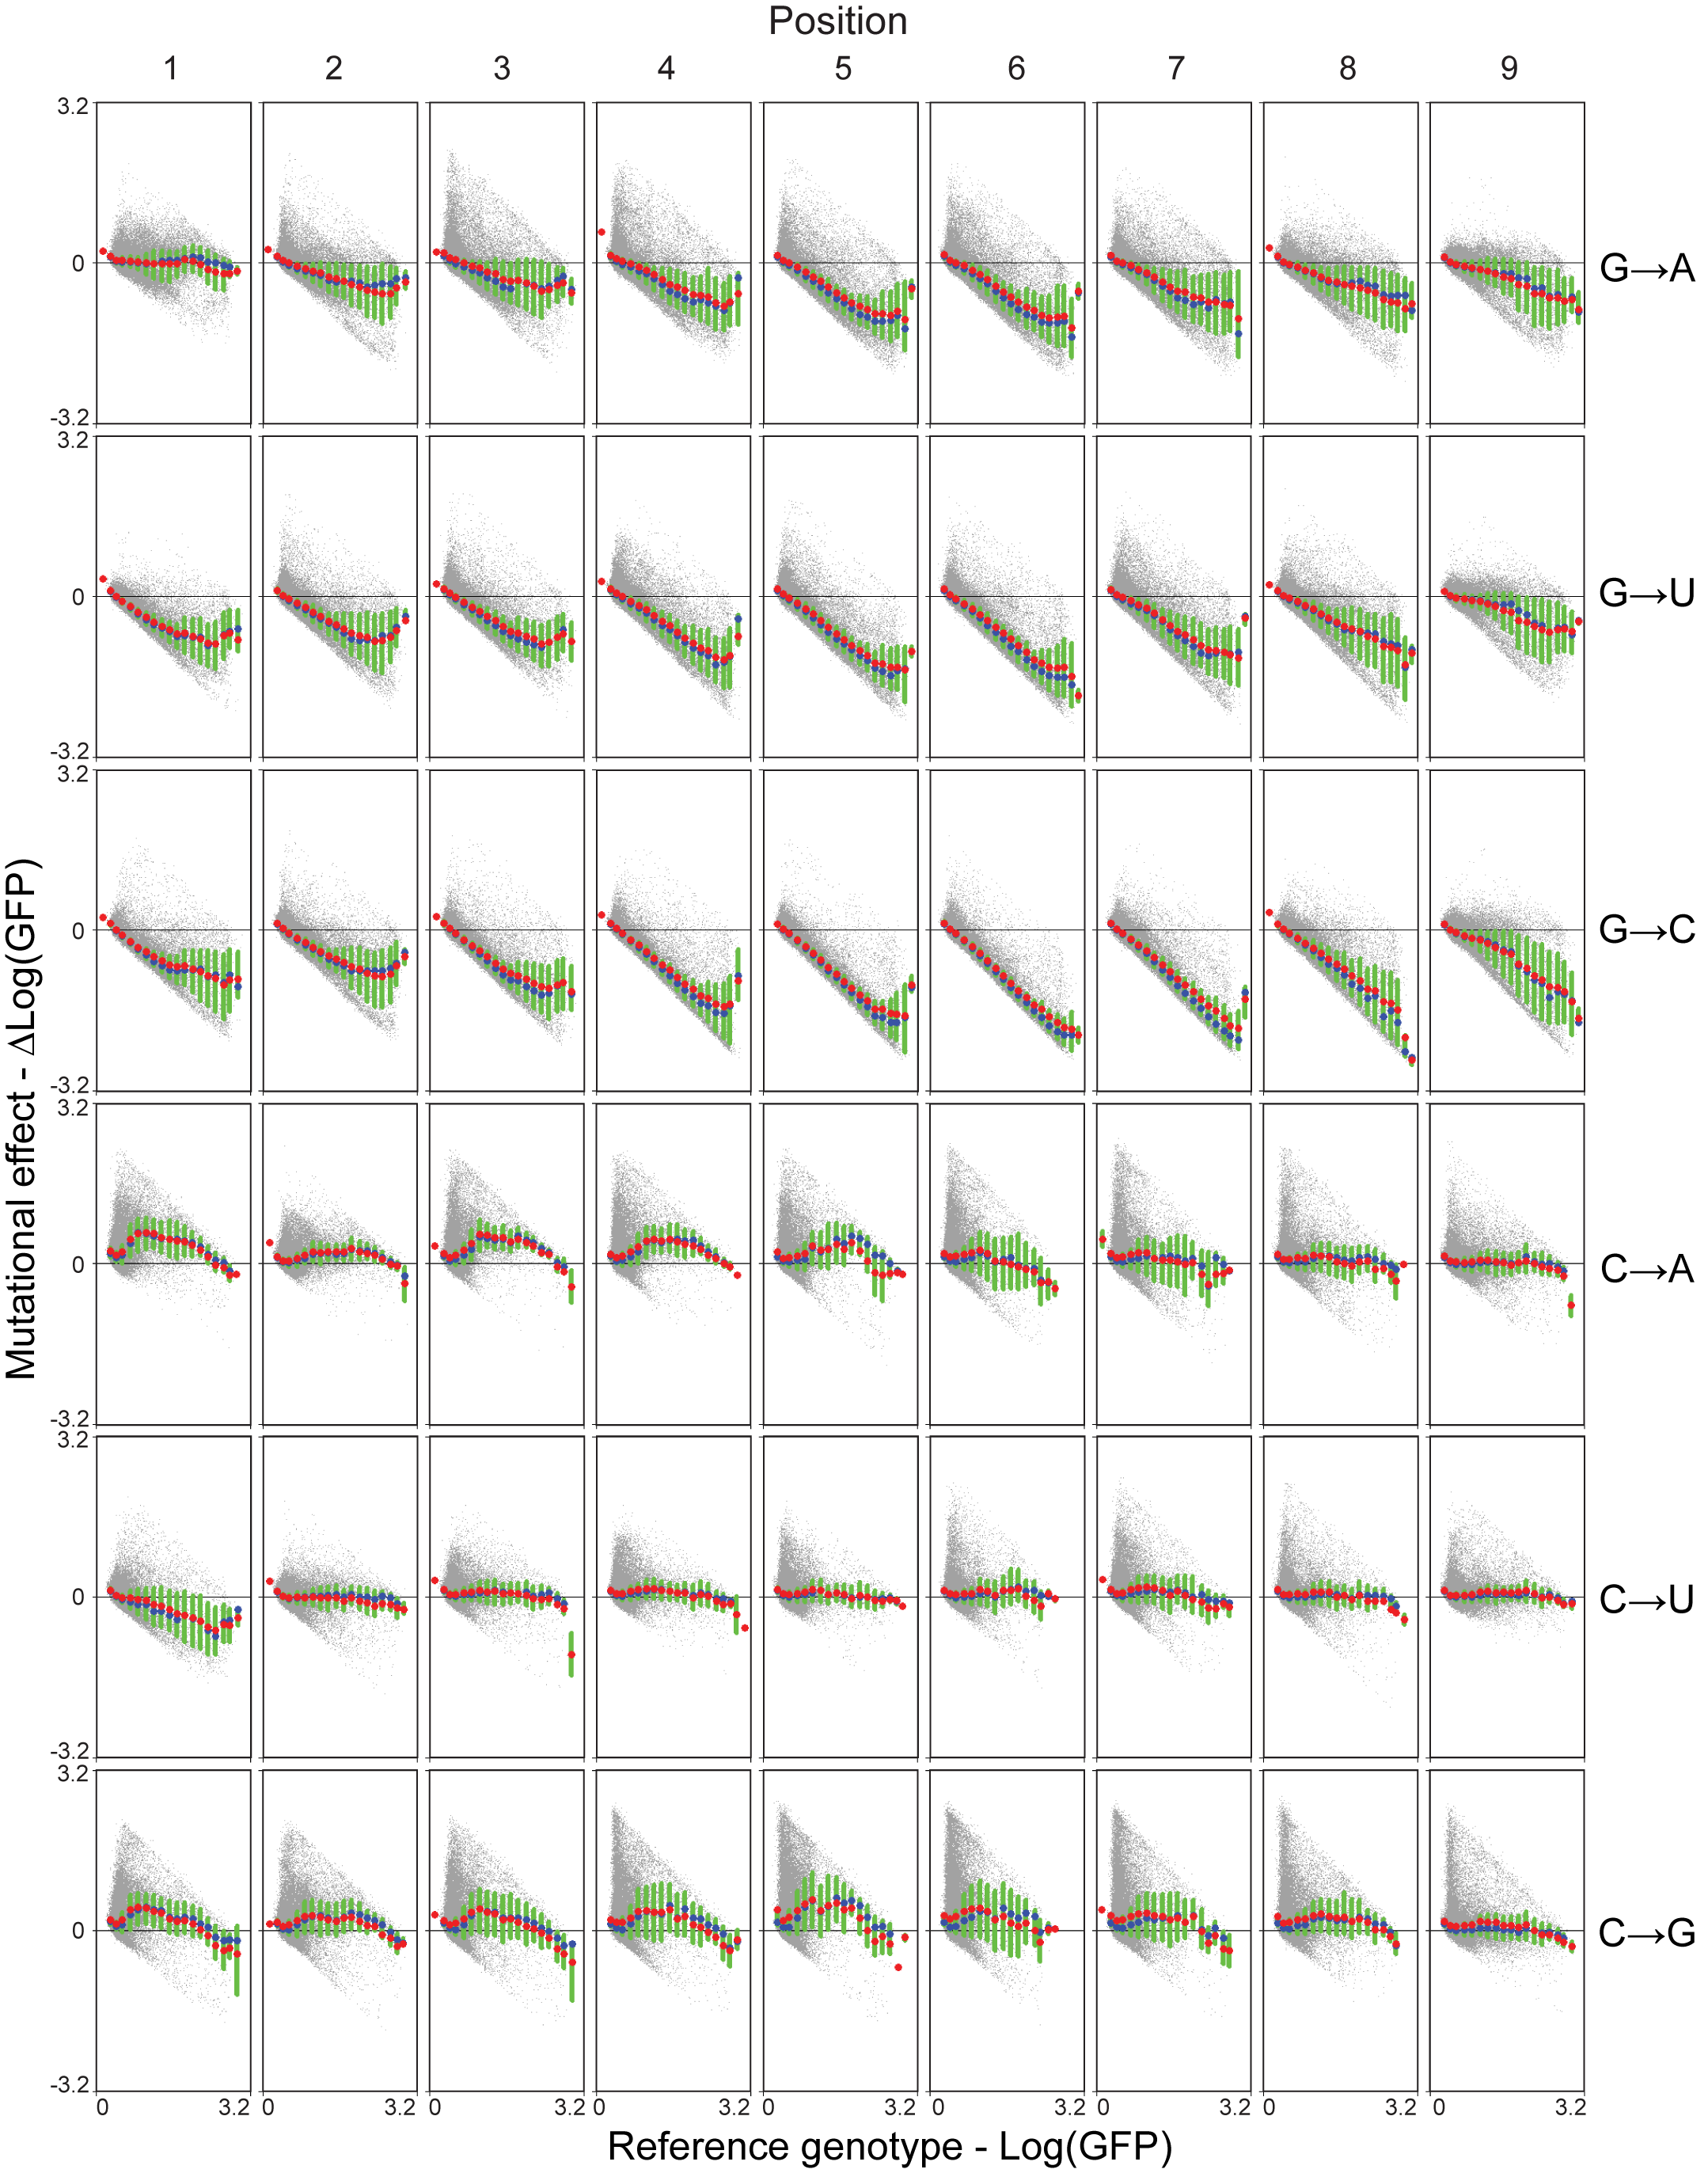


Supplemental Fig. S19. Fitness effects of G→A, G→U, G→C, C→A, C→U, and C→G mutations in FL*arti*. The relationships between the fitness (Log(GFP)) of a genotype and the fitness effects of G→A, G→U, G→C, C→A, C→U, and C→G mutations in this genetic background are separately examined in terms of the nine nucleotide positions of SD. In each panel, genotypes are ranked by fitness and grouped into 20 equal-size bins. Group means, medians, and interquartile ranges are shown as red circles, blue circles, and green bars, respectively.


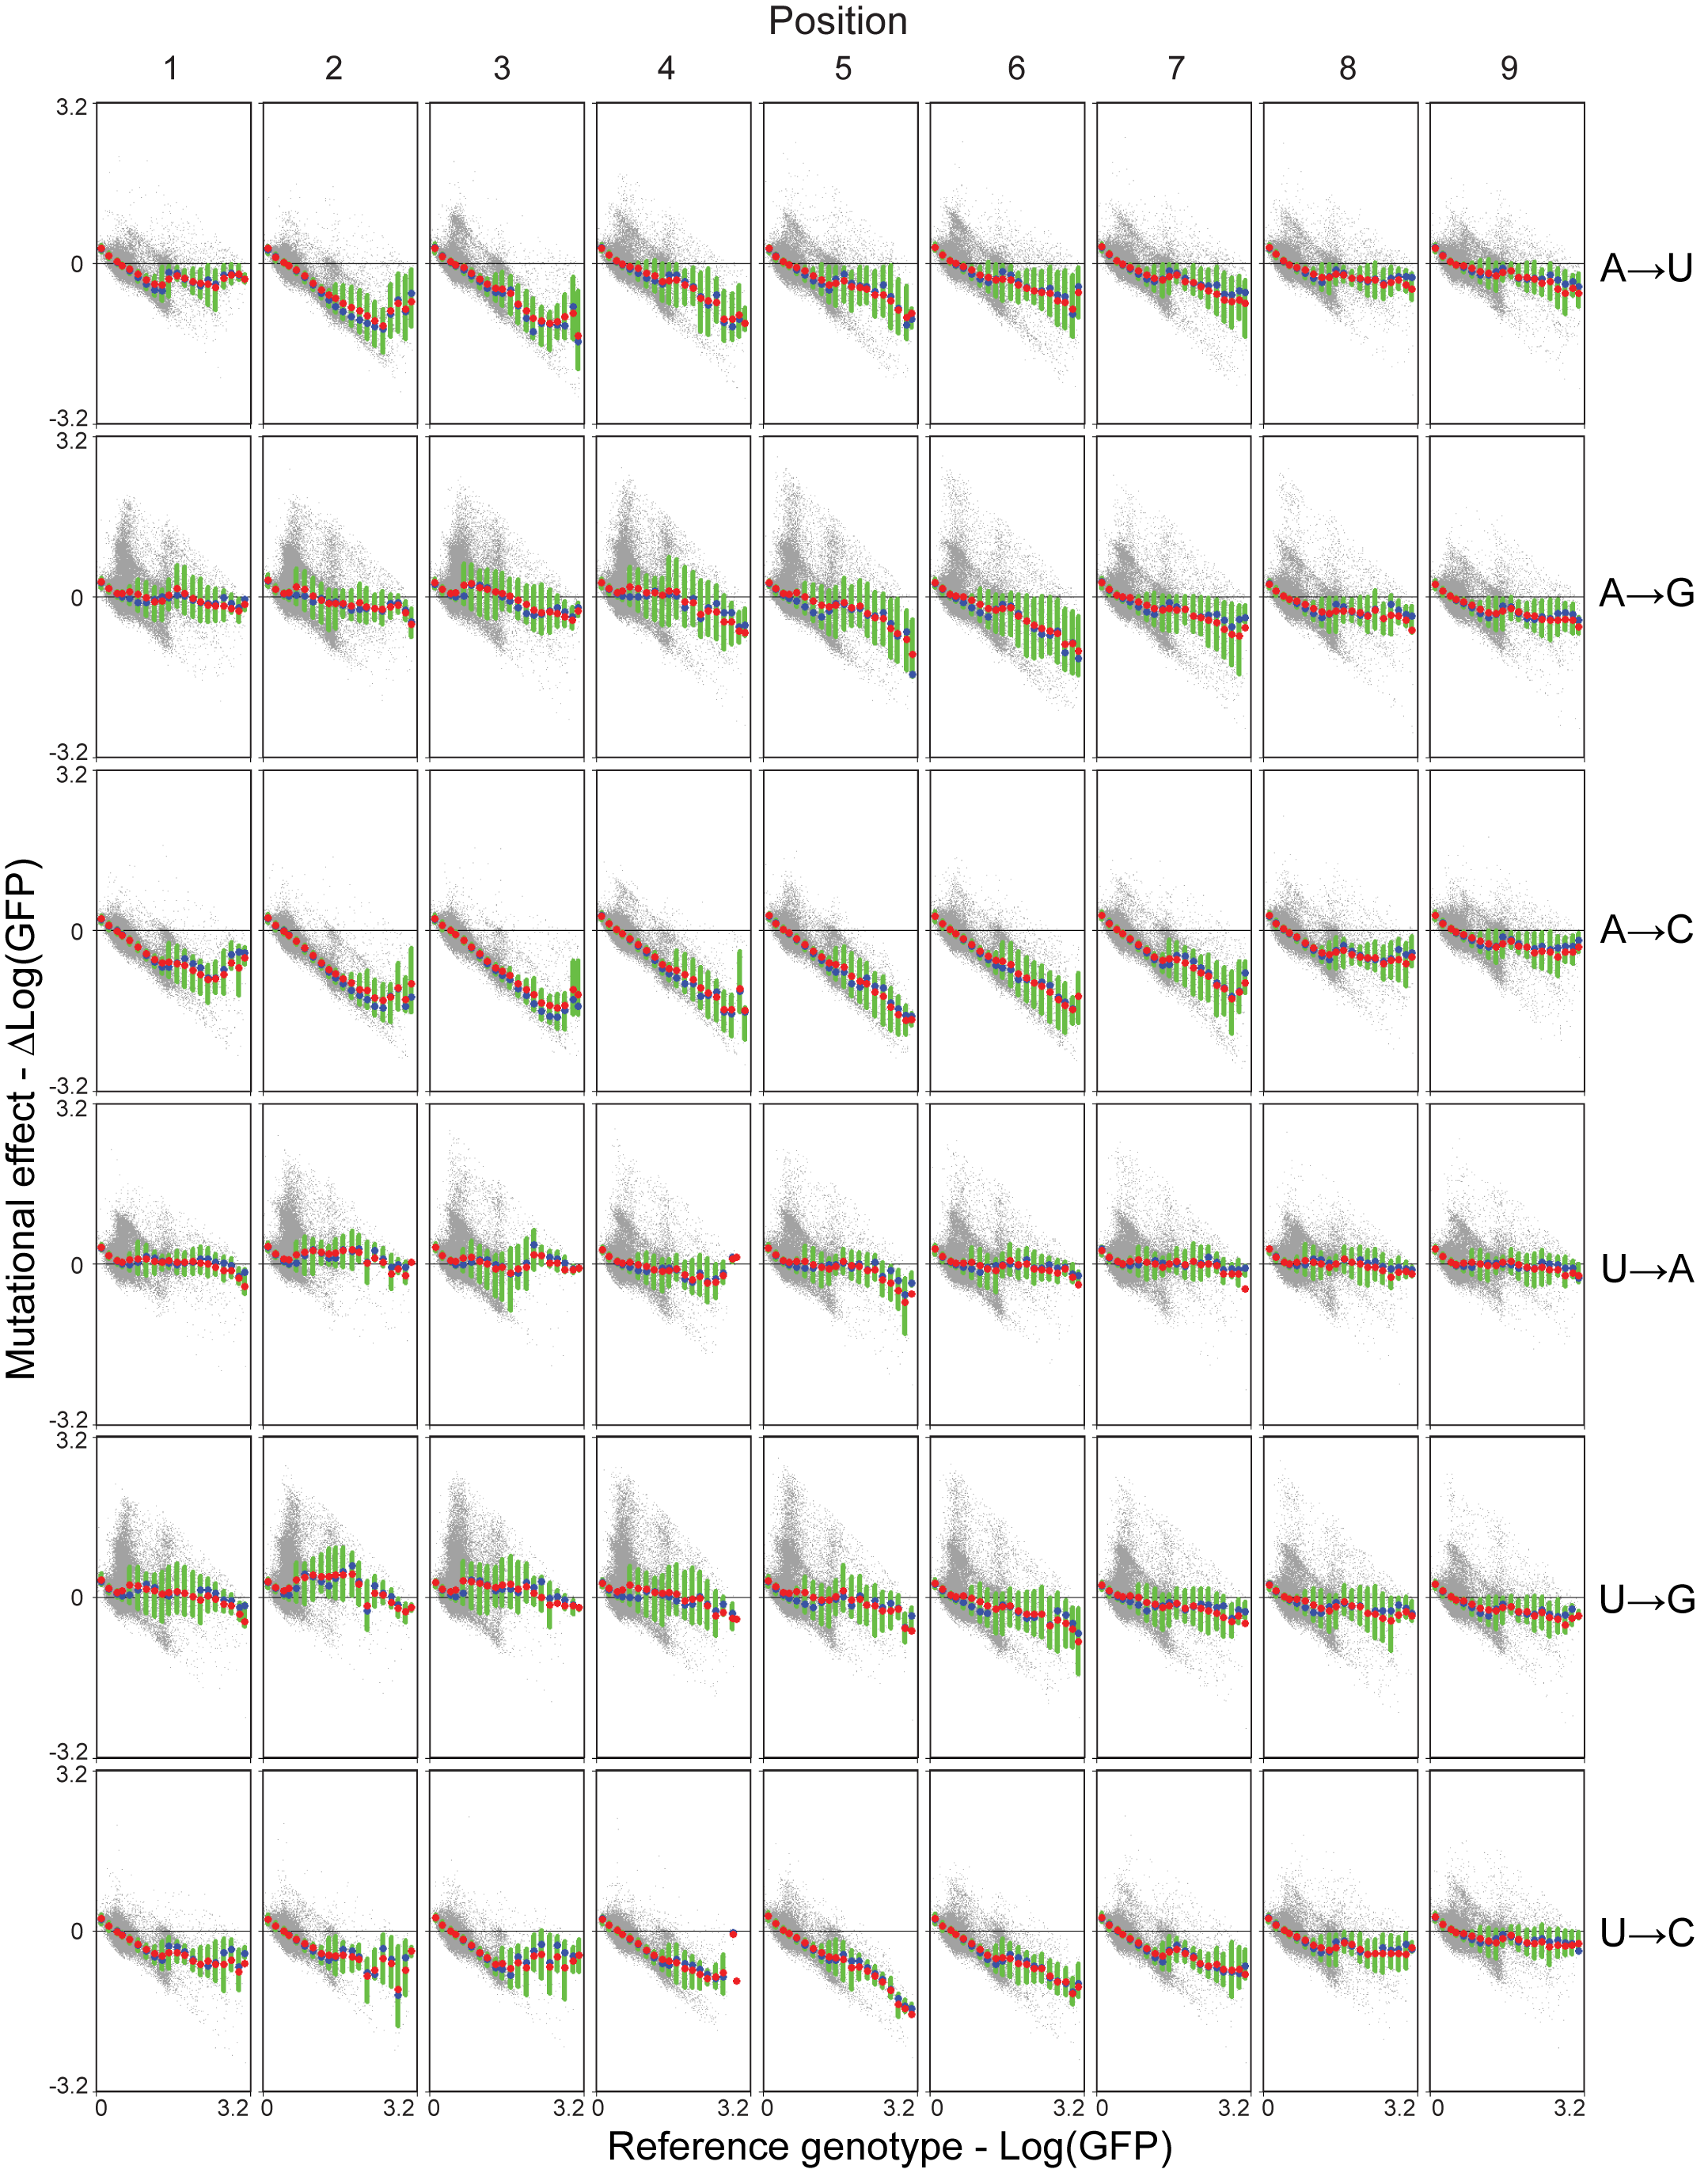


Supplemental Fig. S20. Fitness effects of A→U, A→G, A→C, U→A, U→G, and U→C mutations in FL*dmsC*. The relationships between the fitness (Log(GFP)) of a genotype and the fitness effects of A→U, A→G, A→C, U→A, U→G, and U→C mutations in this genetic background are separately examined in terms of the nine nucleotide positions of SD. In each panel, genotypes are ranked by fitness and grouped into 20 equal-size bins. Group means, medians, and interquartile ranges are shown as red circles, blue circles, and green bars, respectively.


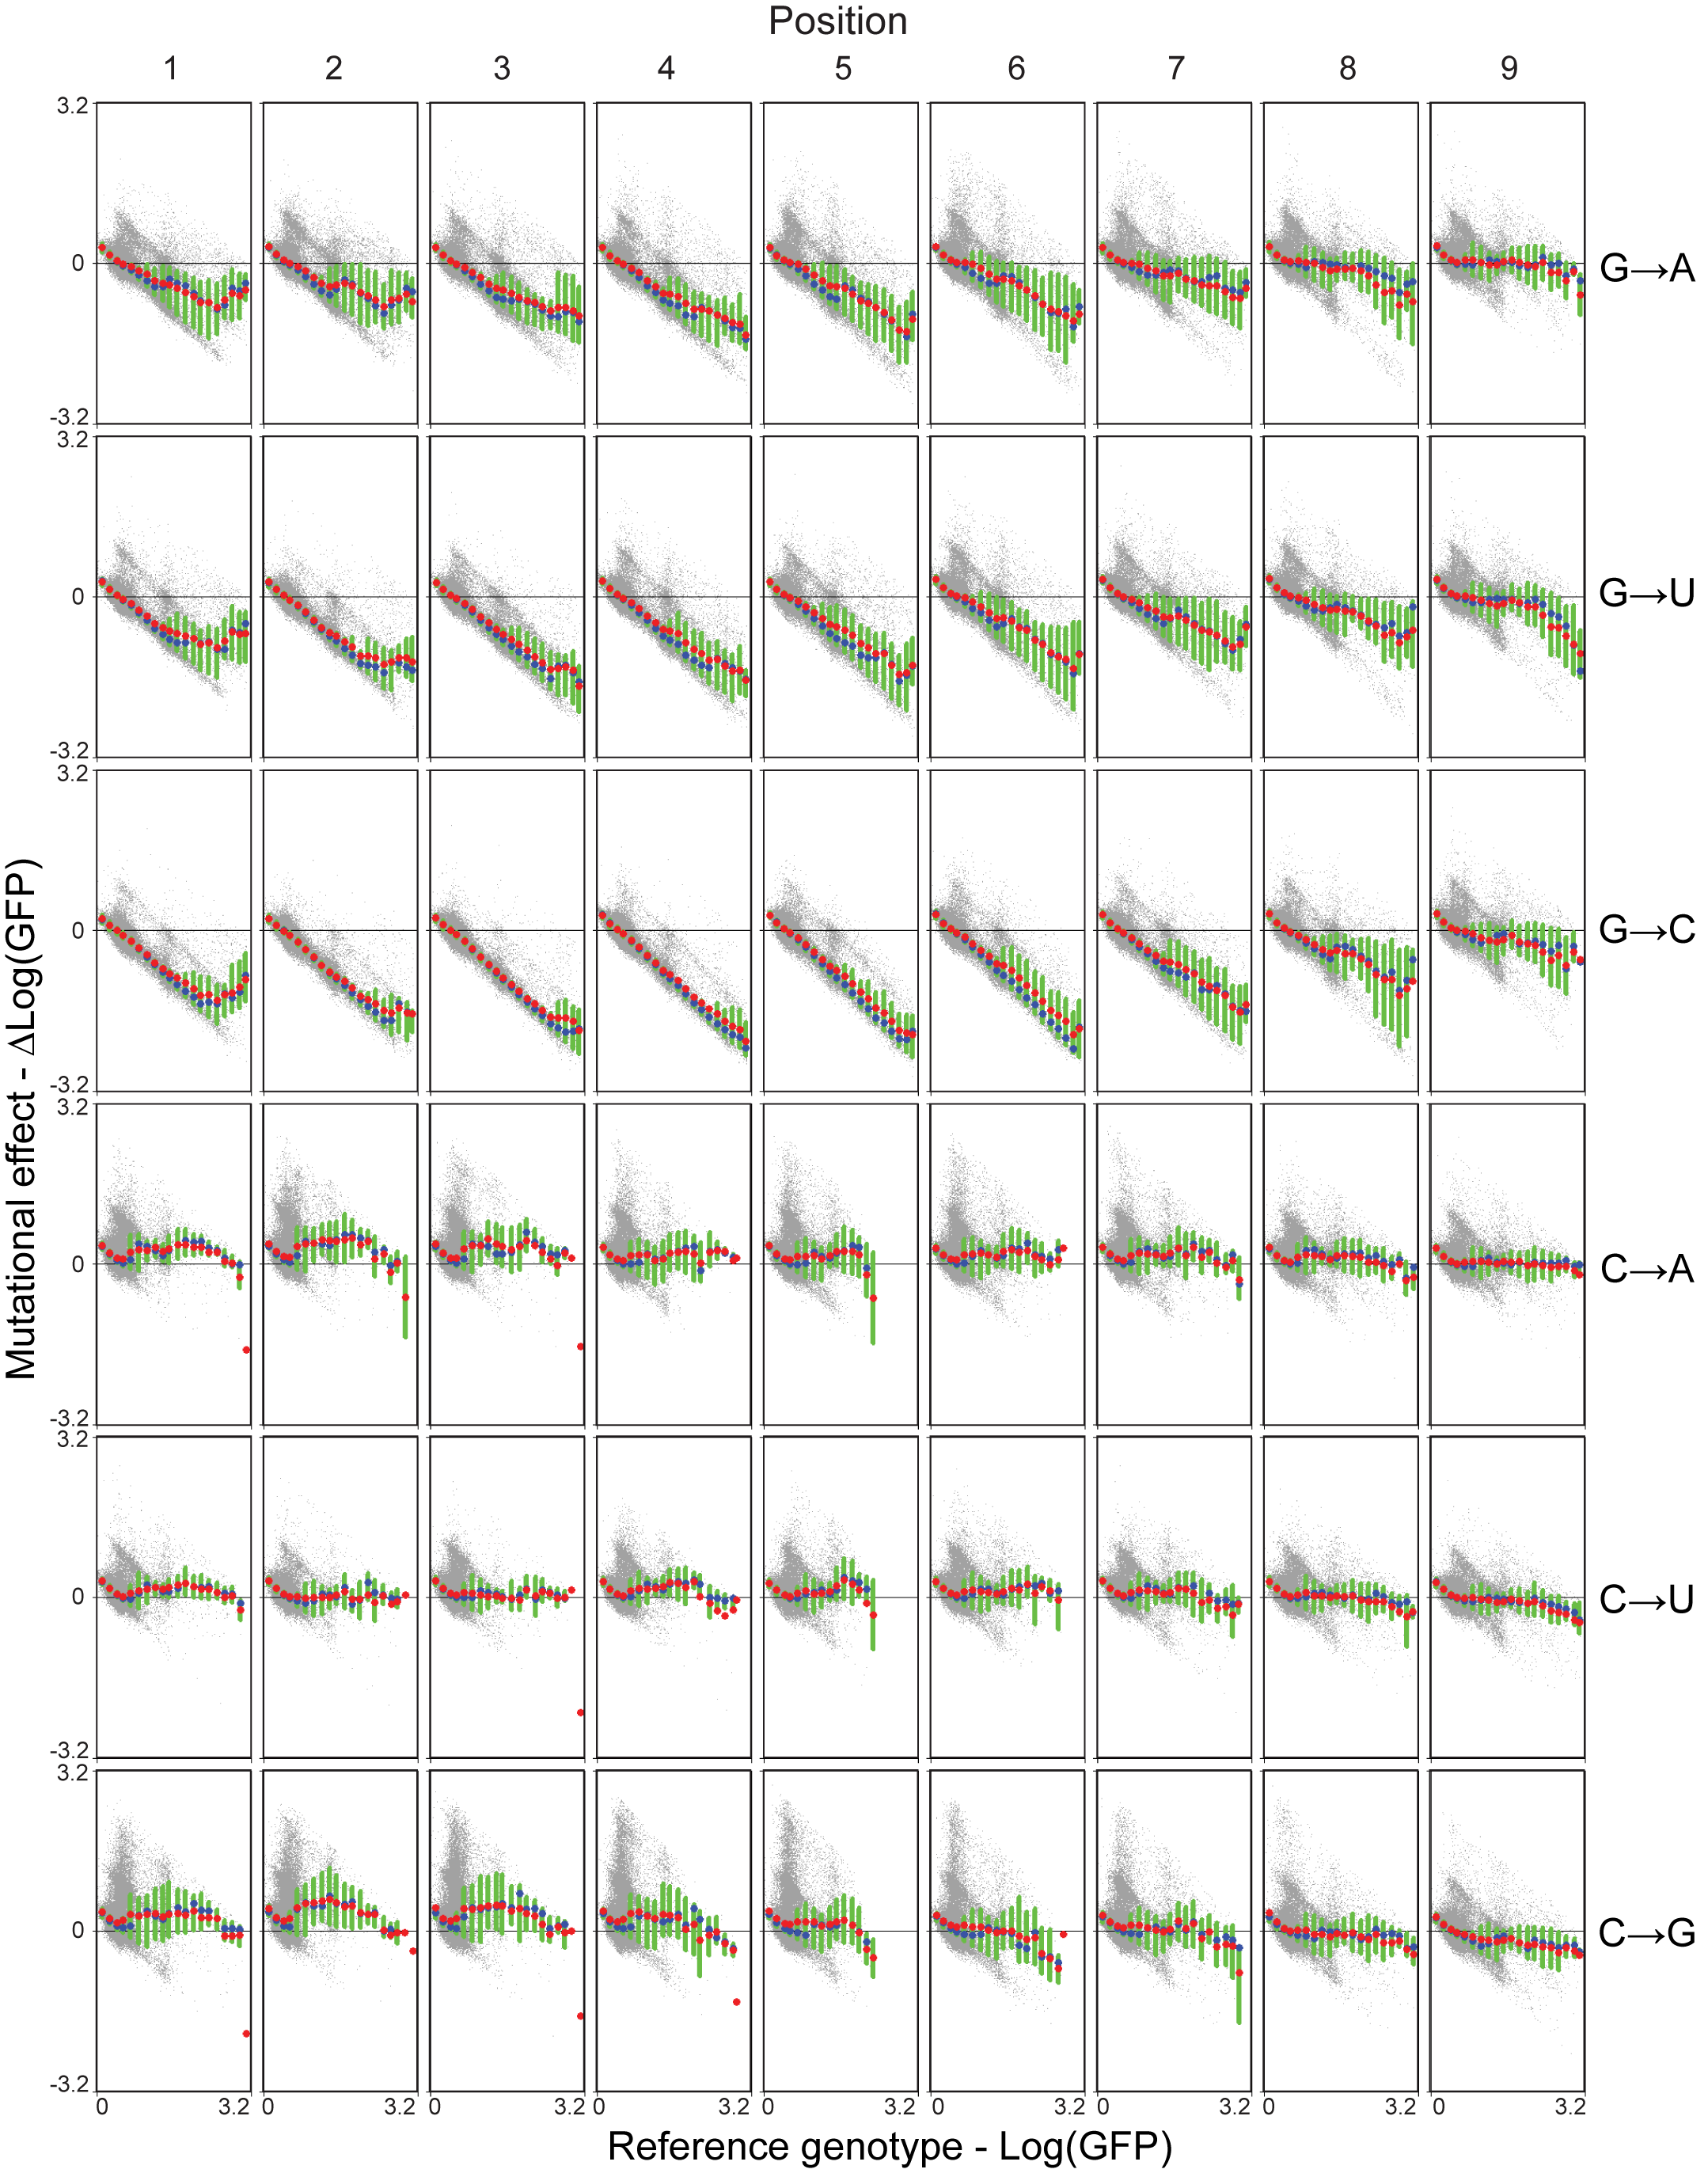


**Supplemental Fig. S21.** Fitness effects of G→A, G→U, G→C, C→A, C→U, and C→G mutations in FL*dmsC*. The relationships between the fitness (Log(GFP)) of a genotype and the fitness effects of G→A, G→U, G→C, C→A, C→U, and C→G mutations in this genetic background are separately examined in terms of the nine nucleotide positions of SD. In each panel, genotypes are ranked by fitness and grouped into 20 equal-size bins. Group means, medians, and interquartile ranges are shown as red circles, blue circles, and green bars, respectively.


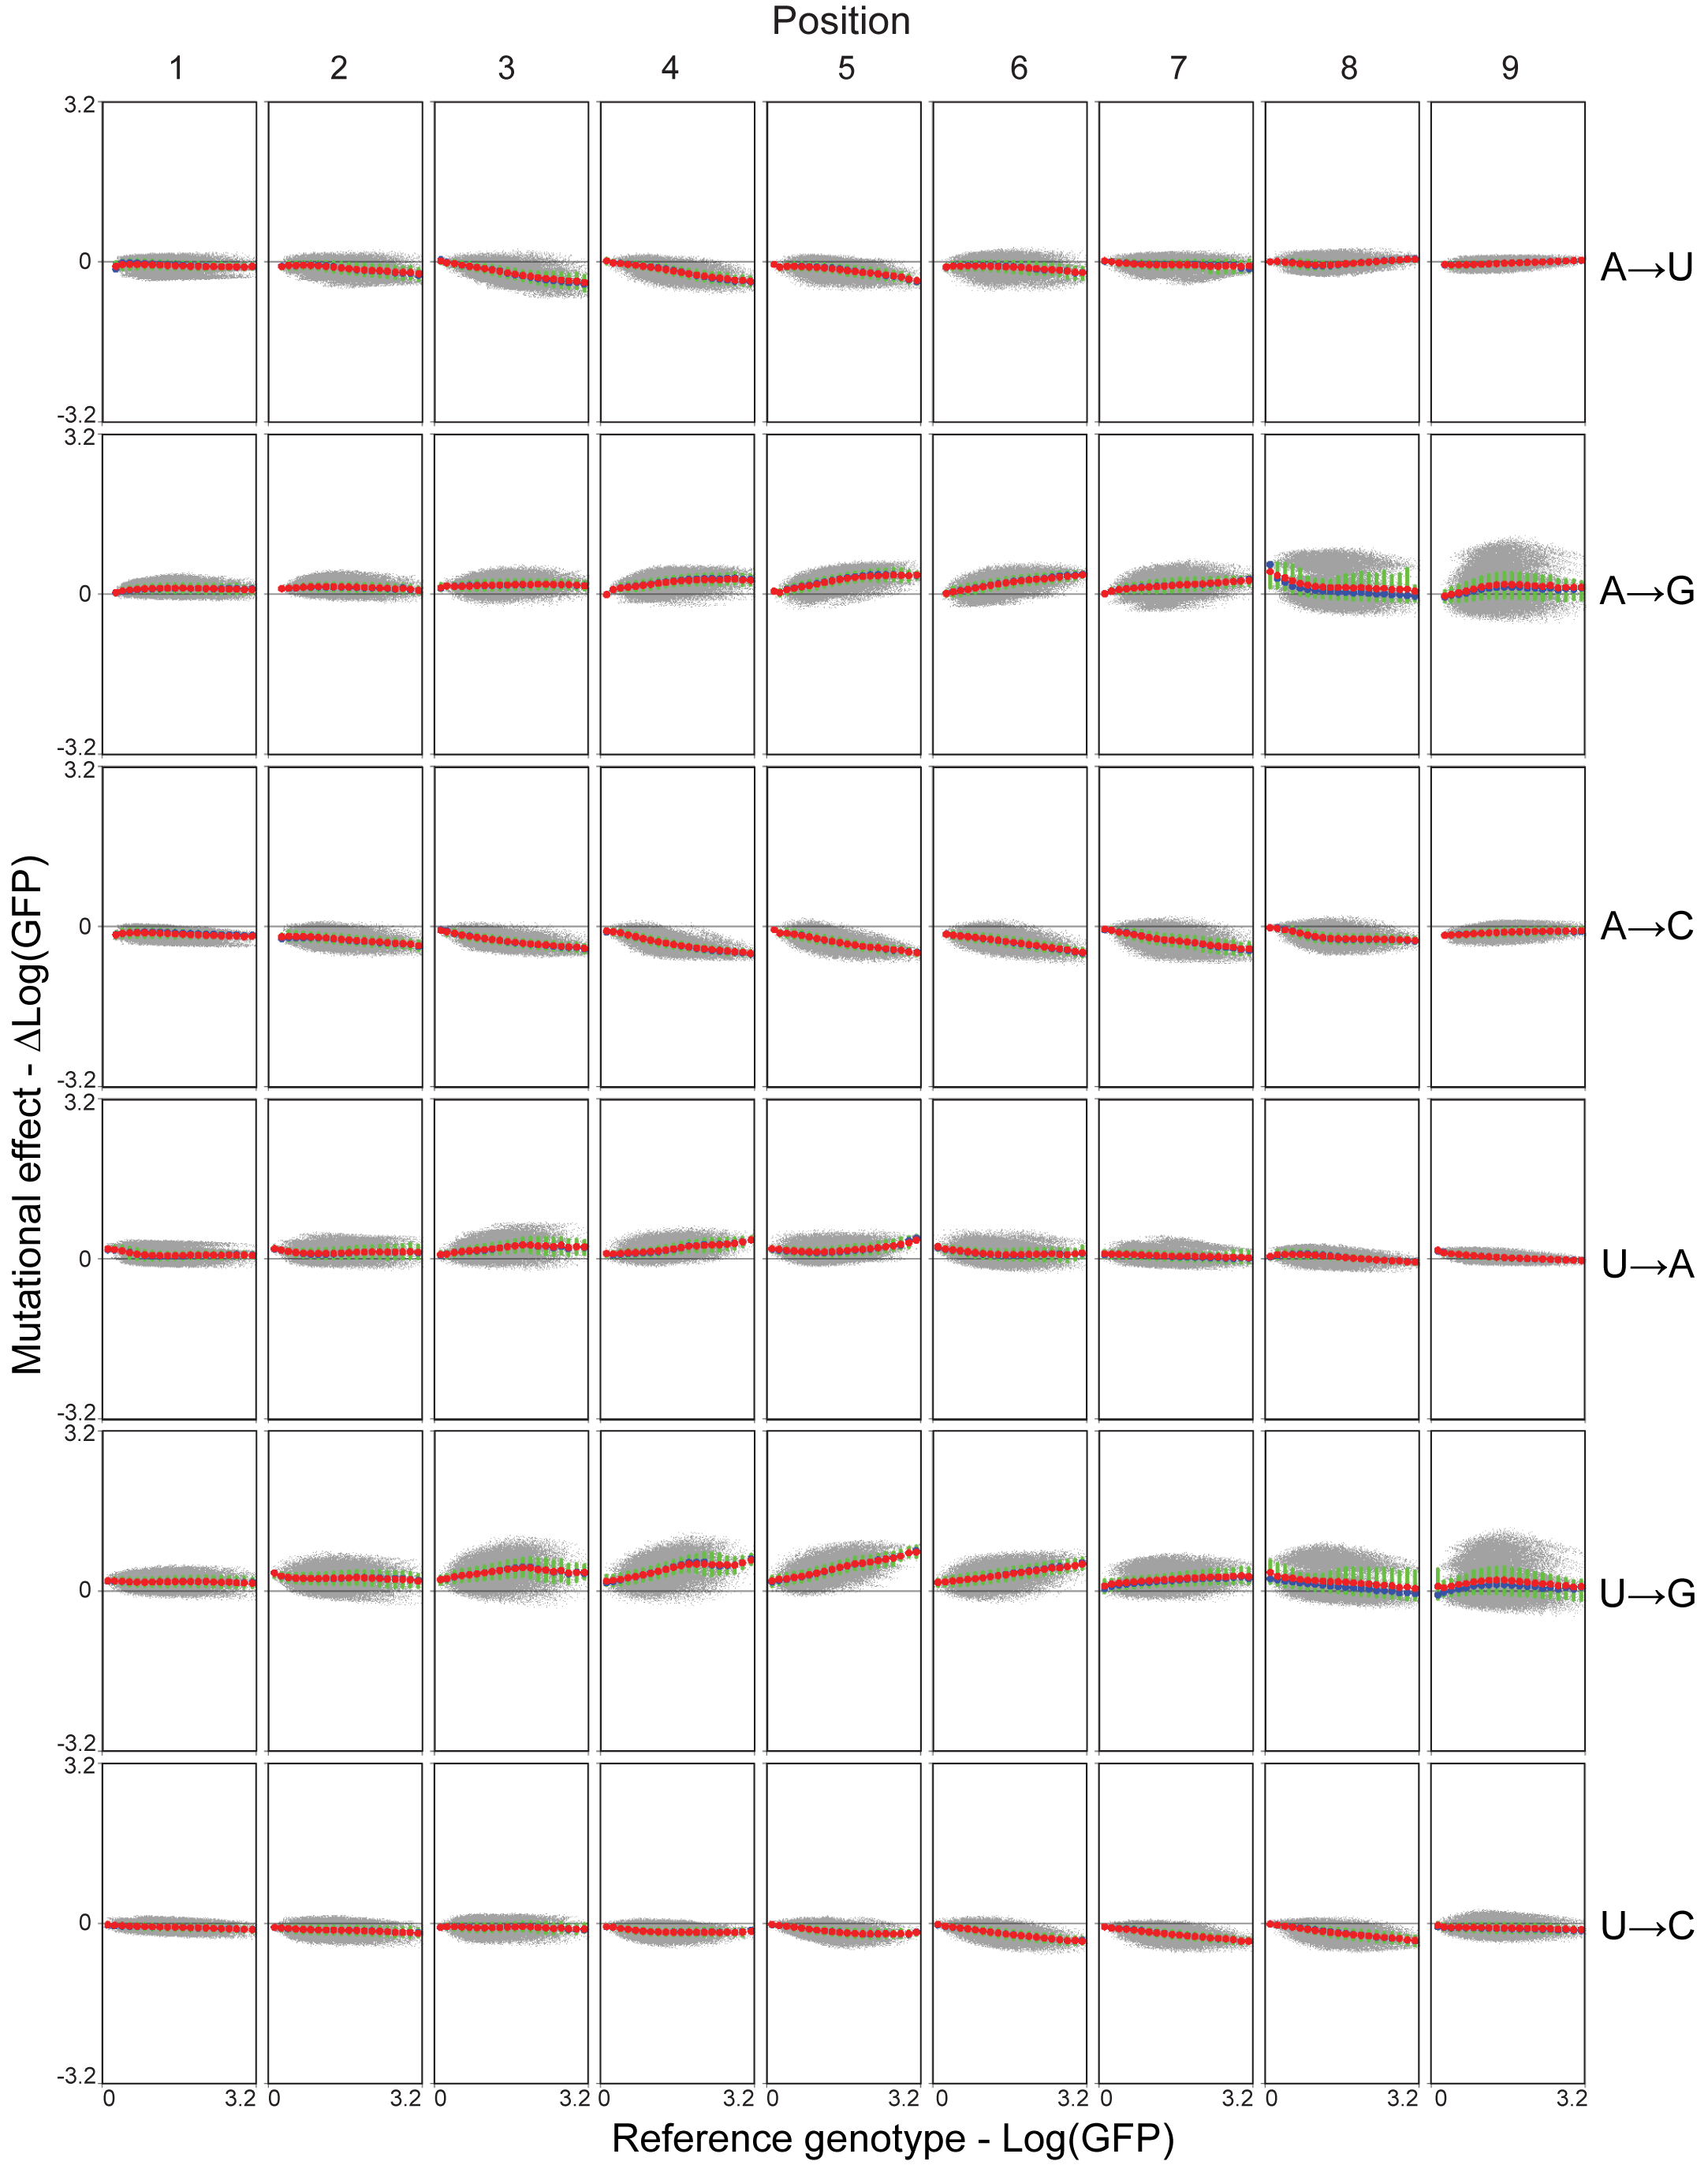


Supplemental Fig. S22. Fitness effects of A→U, A→G, A→C, U→A, U→G, and U→C mutations in FL*fepB* predicted by the additive model. The relationships between the fitness (Log(GFP)) of a genotype and the predicted fitness effects of A→U, A→G, A→C, U→A, U→G, and U→C mutations in this genetic background are separately examined in terms of the nine nucleotide positions of SD. In each panel, genotypes are ranked by fitness and grouped into 20 equal-size bins. Group means, medians, and interquartile ranges are shown as red circles, blue circles, and green bars, respectively.


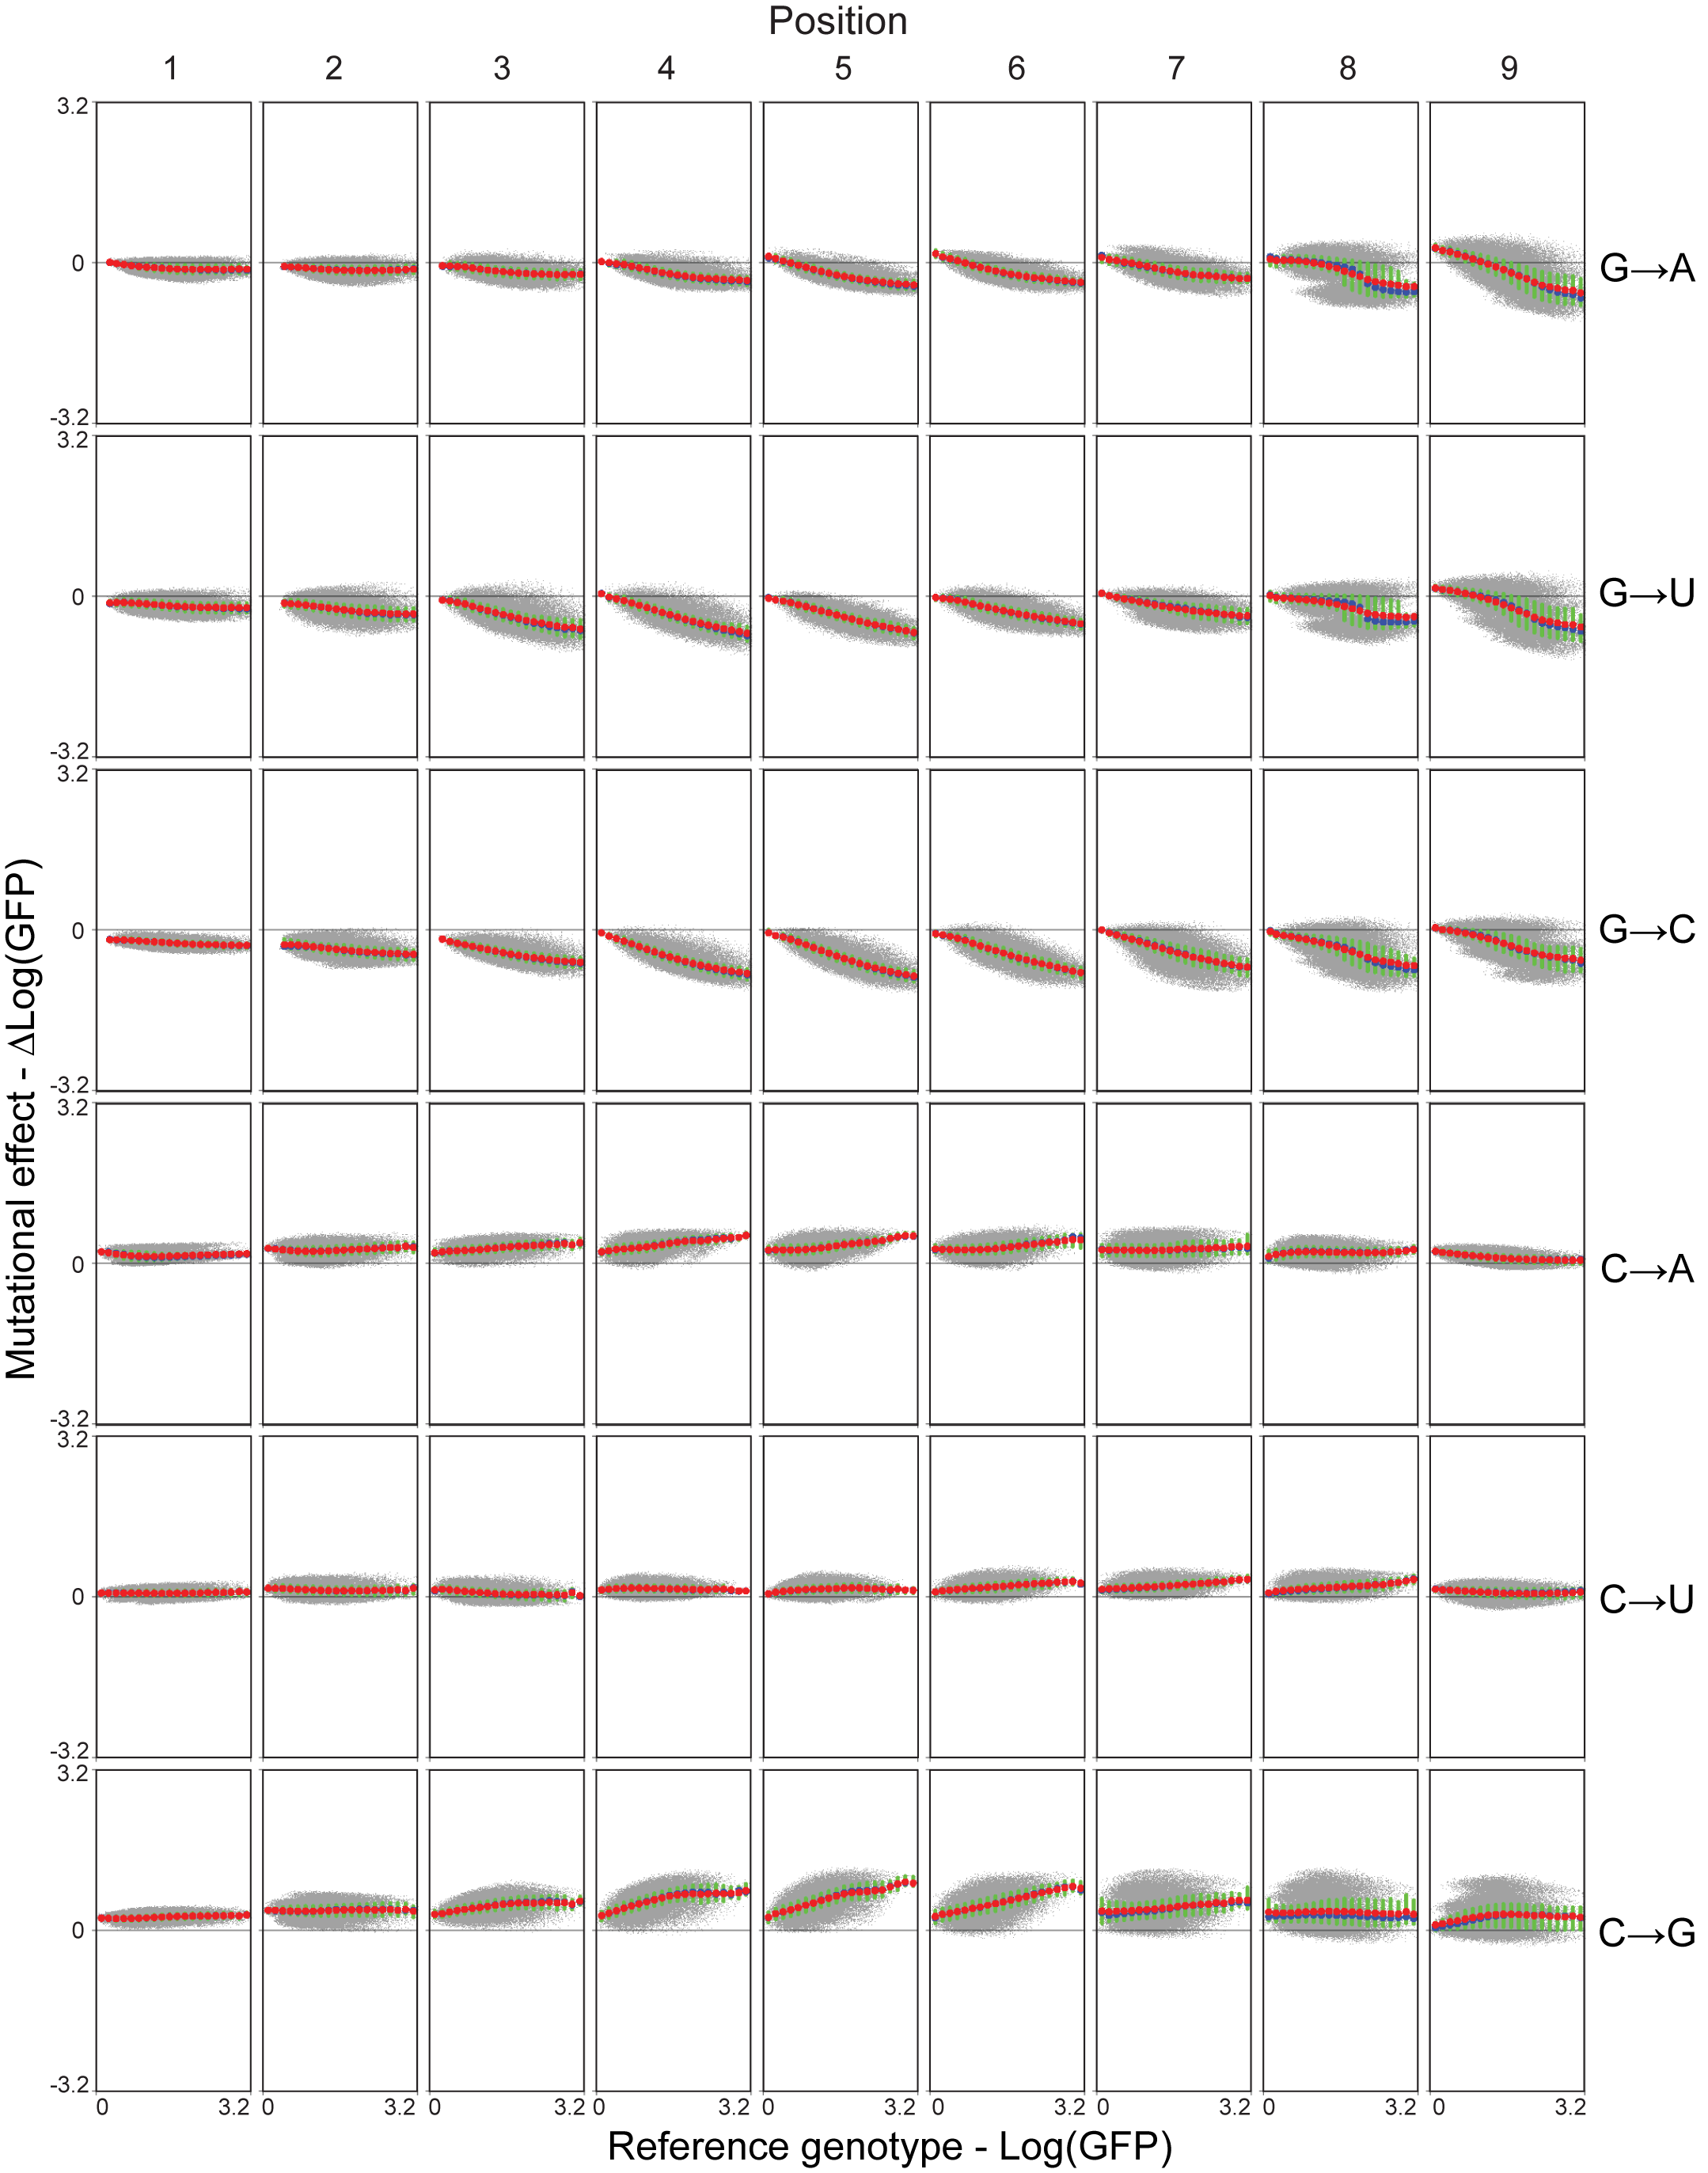


Supplemental Fig. S23. Fitness effects of G→A, G→U, G→C, C→A, C→U, and C→G mutations in FL*fepB* predicted by the additive model. The relationships between the fitness (Log(GFP)) of a genotype and the predicted fitness effects of G→A, G→U, G→C, C→A, C→U, and C→G mutations in this genetic background are separately examined in terms of the nine nucleotide positions of SD. In each panel, genotypes are ranked by fitness and grouped into 20 equal-size bins. Group means, medians, and interquartile ranges are shown as red circles, blue circles, and green bars, respectively.


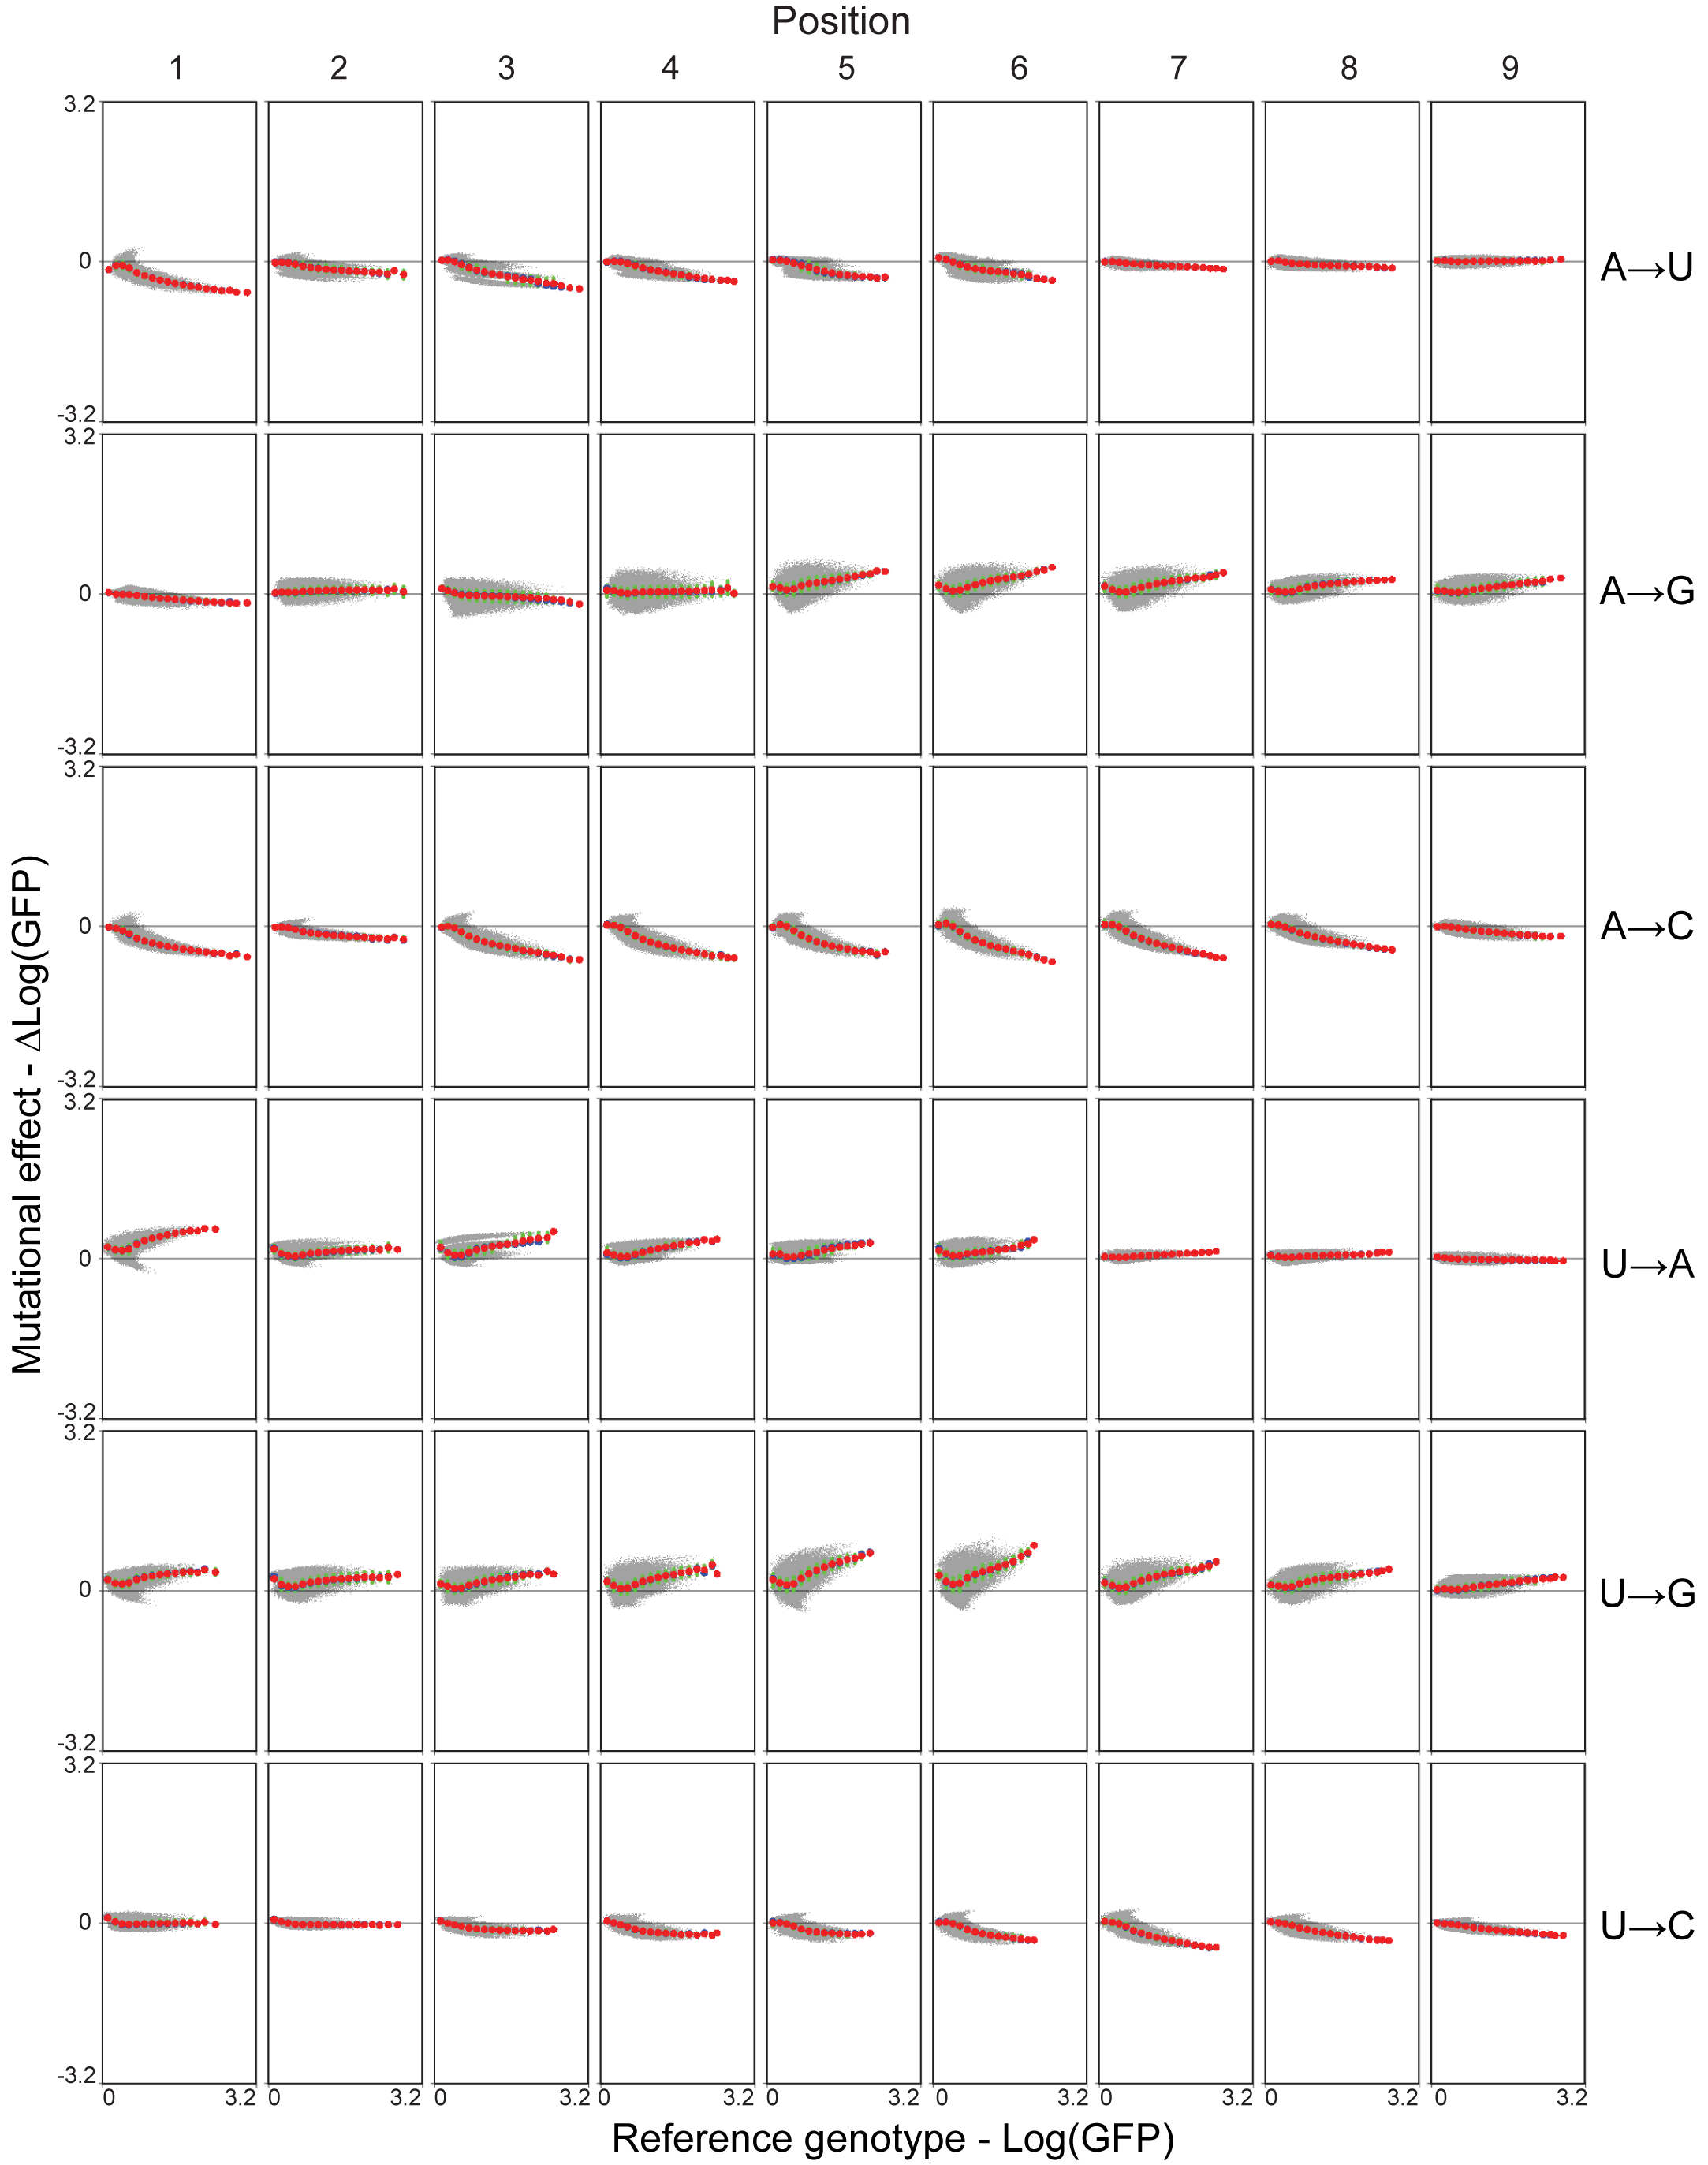


Supplemental Fig. S24. Fitness effects of A→U, A→G, A→C, U→A, U→G, and U→C mutations in FL*arti* predicted by the additive model. The relationships between the fitness (Log(GFP)) of a genotype and the predicted fitness effects of A→U, A→G, A→C, U→A, U→G, and U→C mutations in this genetic background are separately examined in terms of the nine nucleotide positions of SD. In each panel, genotypes are ranked by fitness and grouped into 20 equal-size bins. Group means, medians, and interquartile ranges are shown as red circles, blue circles, and green bars, respectively.


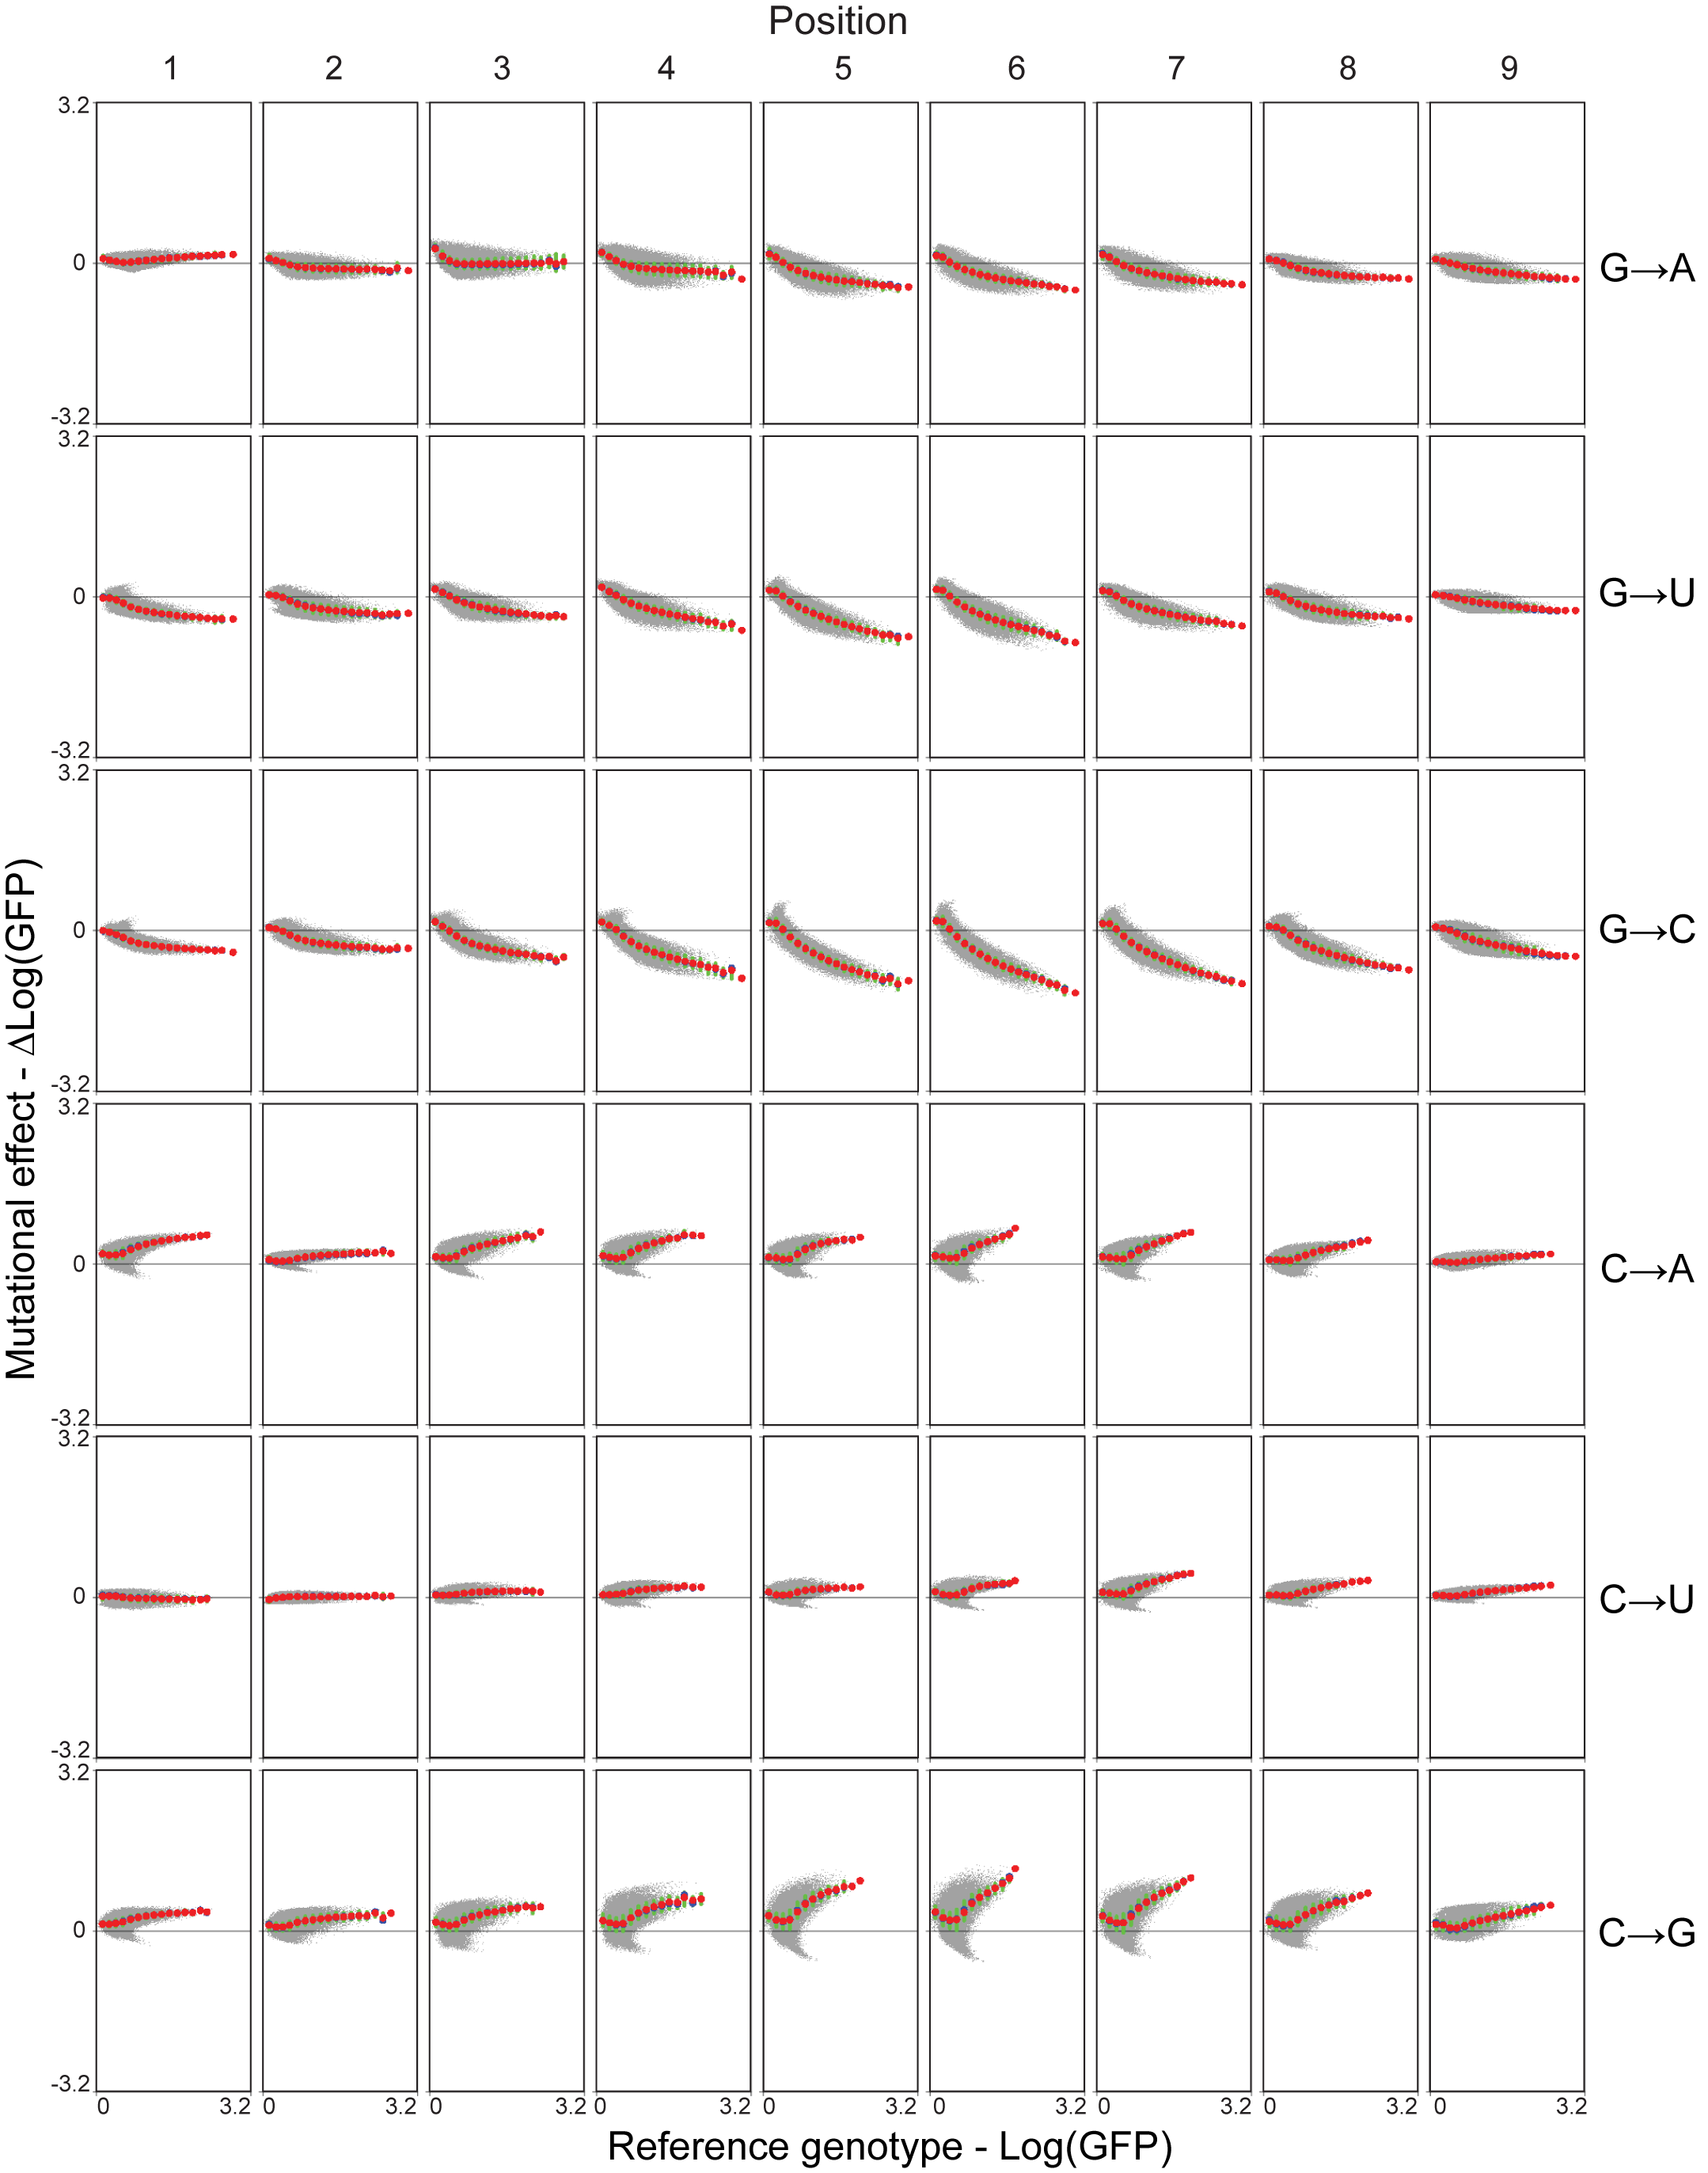


Supplemental Fig. S25. Fitness effects of G→A, G→U, G→C, C→A, C→U, and C→G mutations in FL*arti* predicted by the additive model. The relationships between the fitness (Log(GFP)) of a genotype and the predicted fitness effects of G→A, G→U, G→C, C→A, C→U, and C→G mutations in this genetic background are separately examined in terms of the nine nucleotide positions of SD. In each panel, genotypes are ranked by fitness and grouped into 20 equal-size bins. Group means, medians, and interquartile ranges are shown as red circles, blue circles, and green bars, respectively.


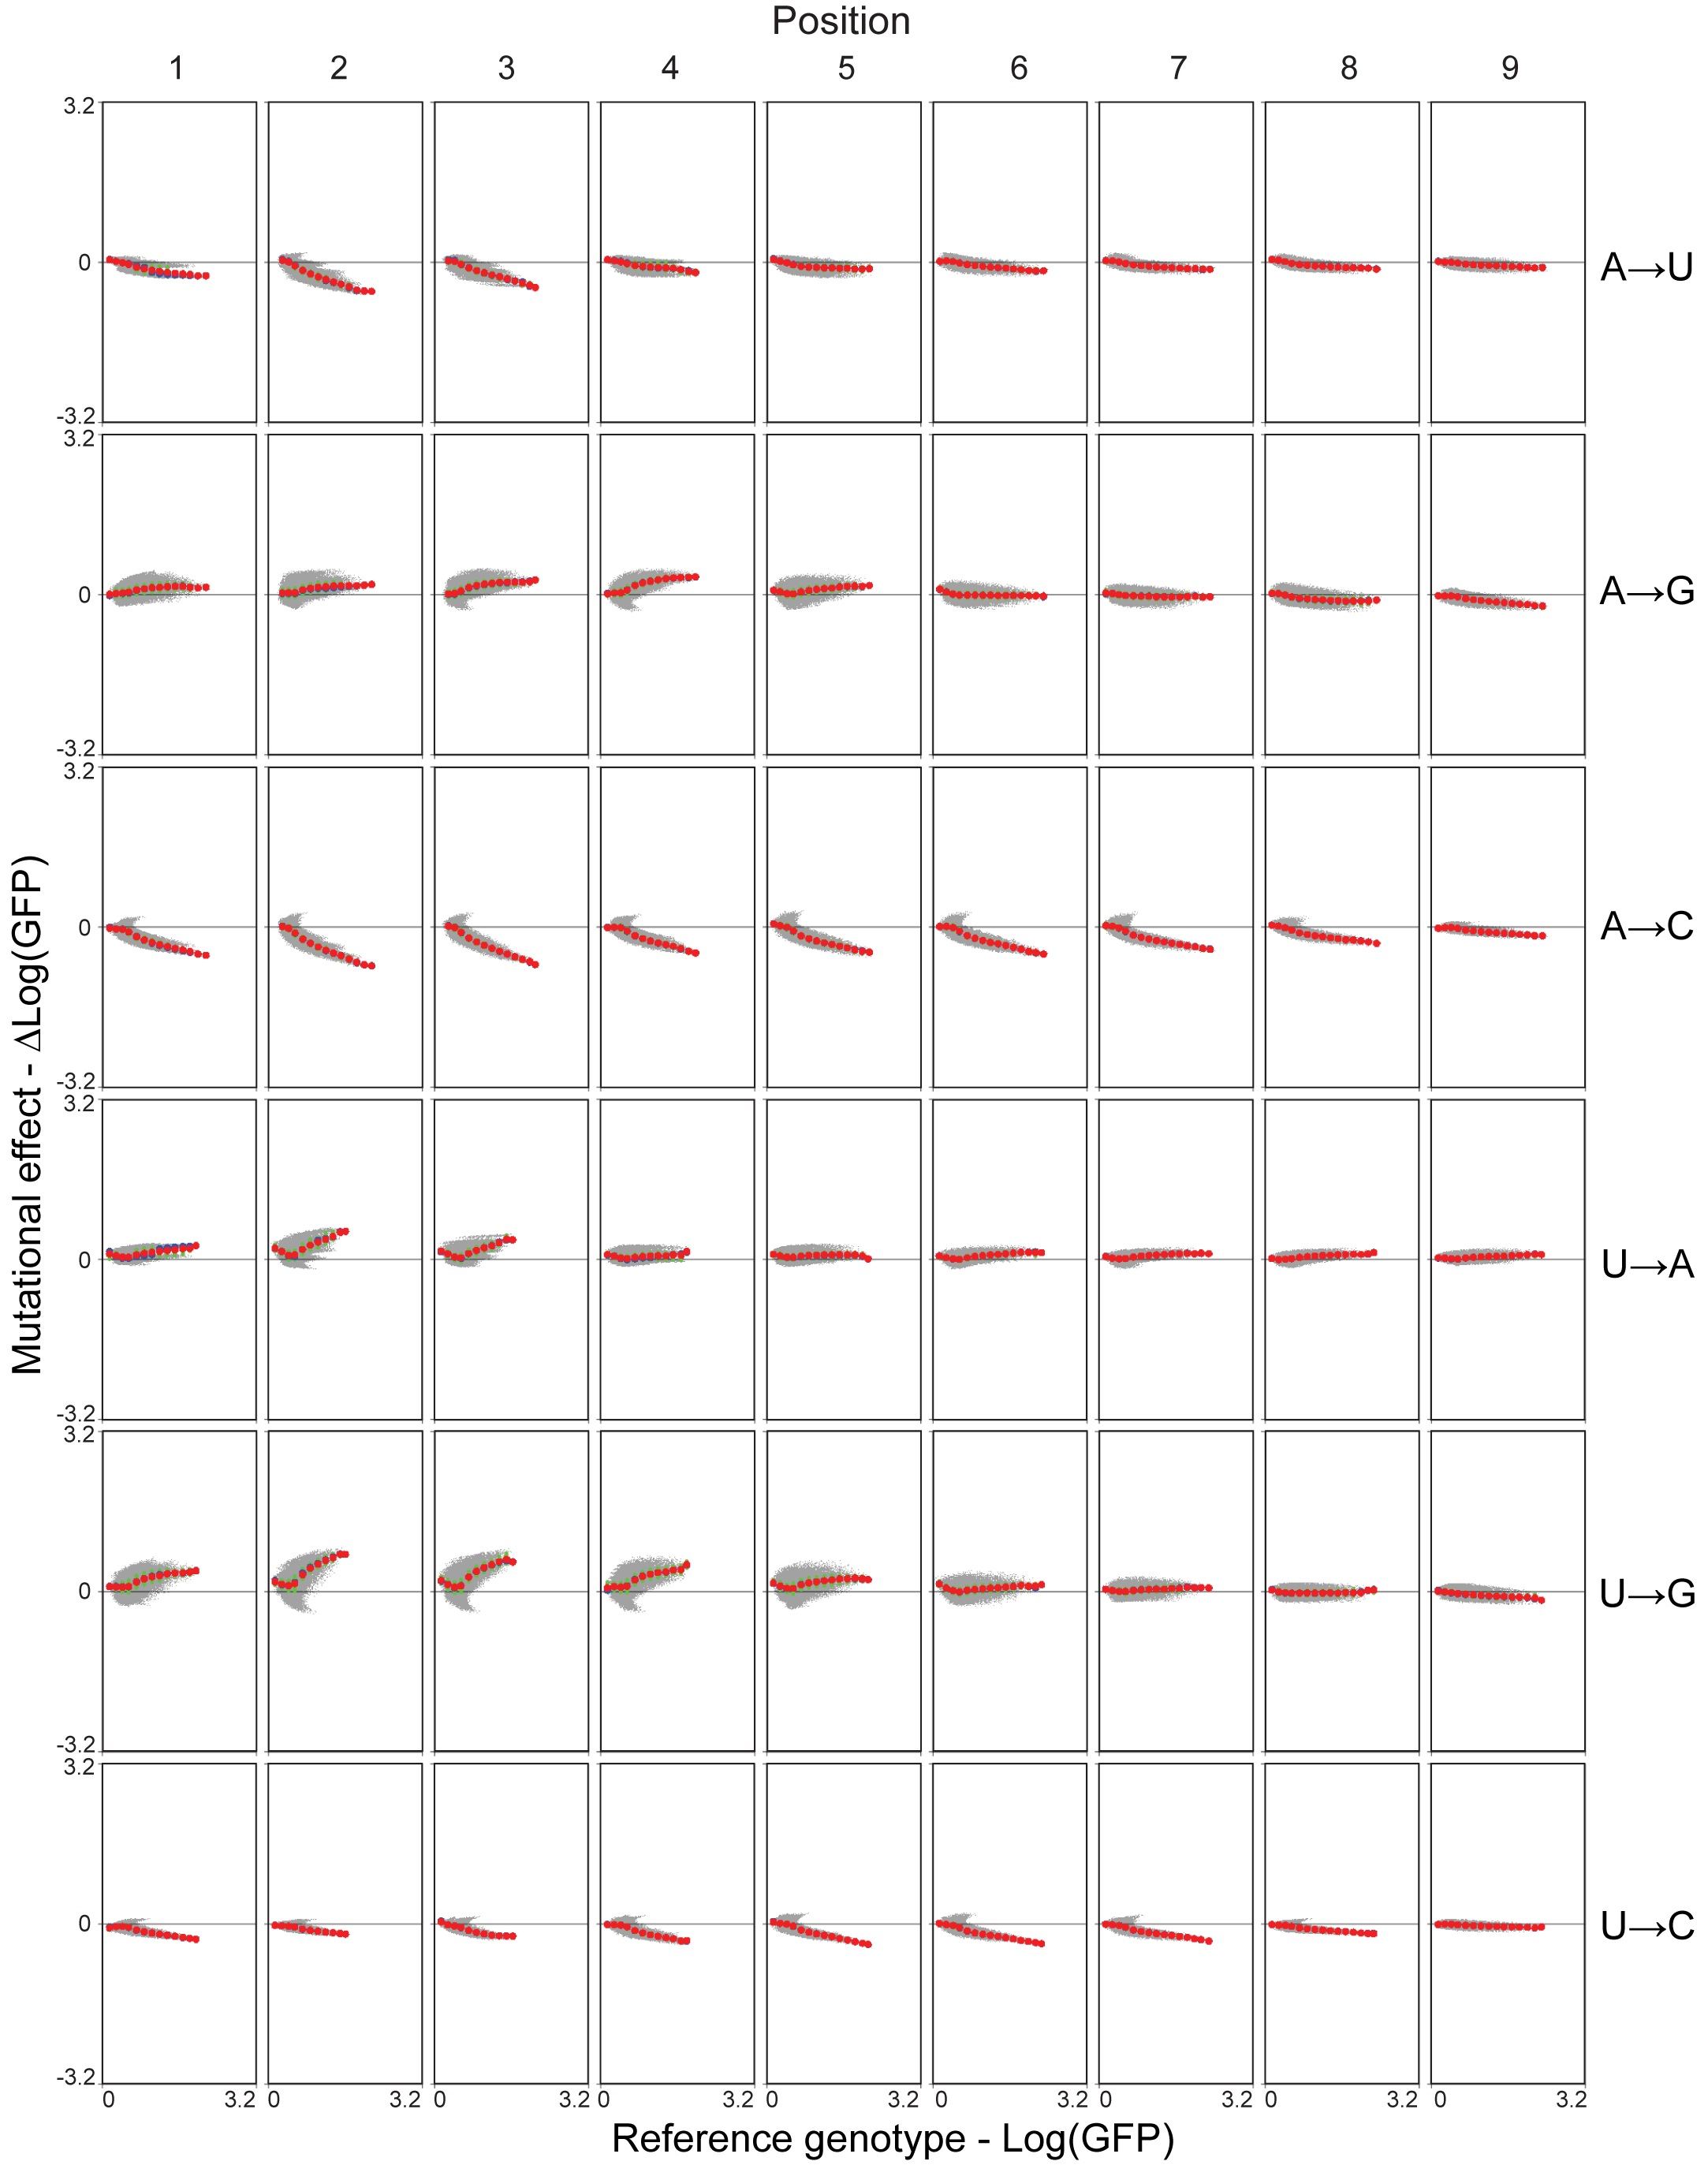


Supplemental Fig. S26. Fitness effects of A→U, A→G, A→C, U→A, U→G, and U→C mutations in FL*dmsC* predicted by the additive model. The relationships between the fitness (Log(GFP)) of a genotype and the predicted fitness effects of A→U, A→G, A→C, U→A, U→G, and U→C mutations in this genetic background are separately examined in terms of the nine nucleotide positions of SD. In each panel, genotypes are ranked by fitness and grouped into 20 equal-size bins. Group means, medians, and interquartile ranges are shown as red circles, blue circles, and green bars, respectively.


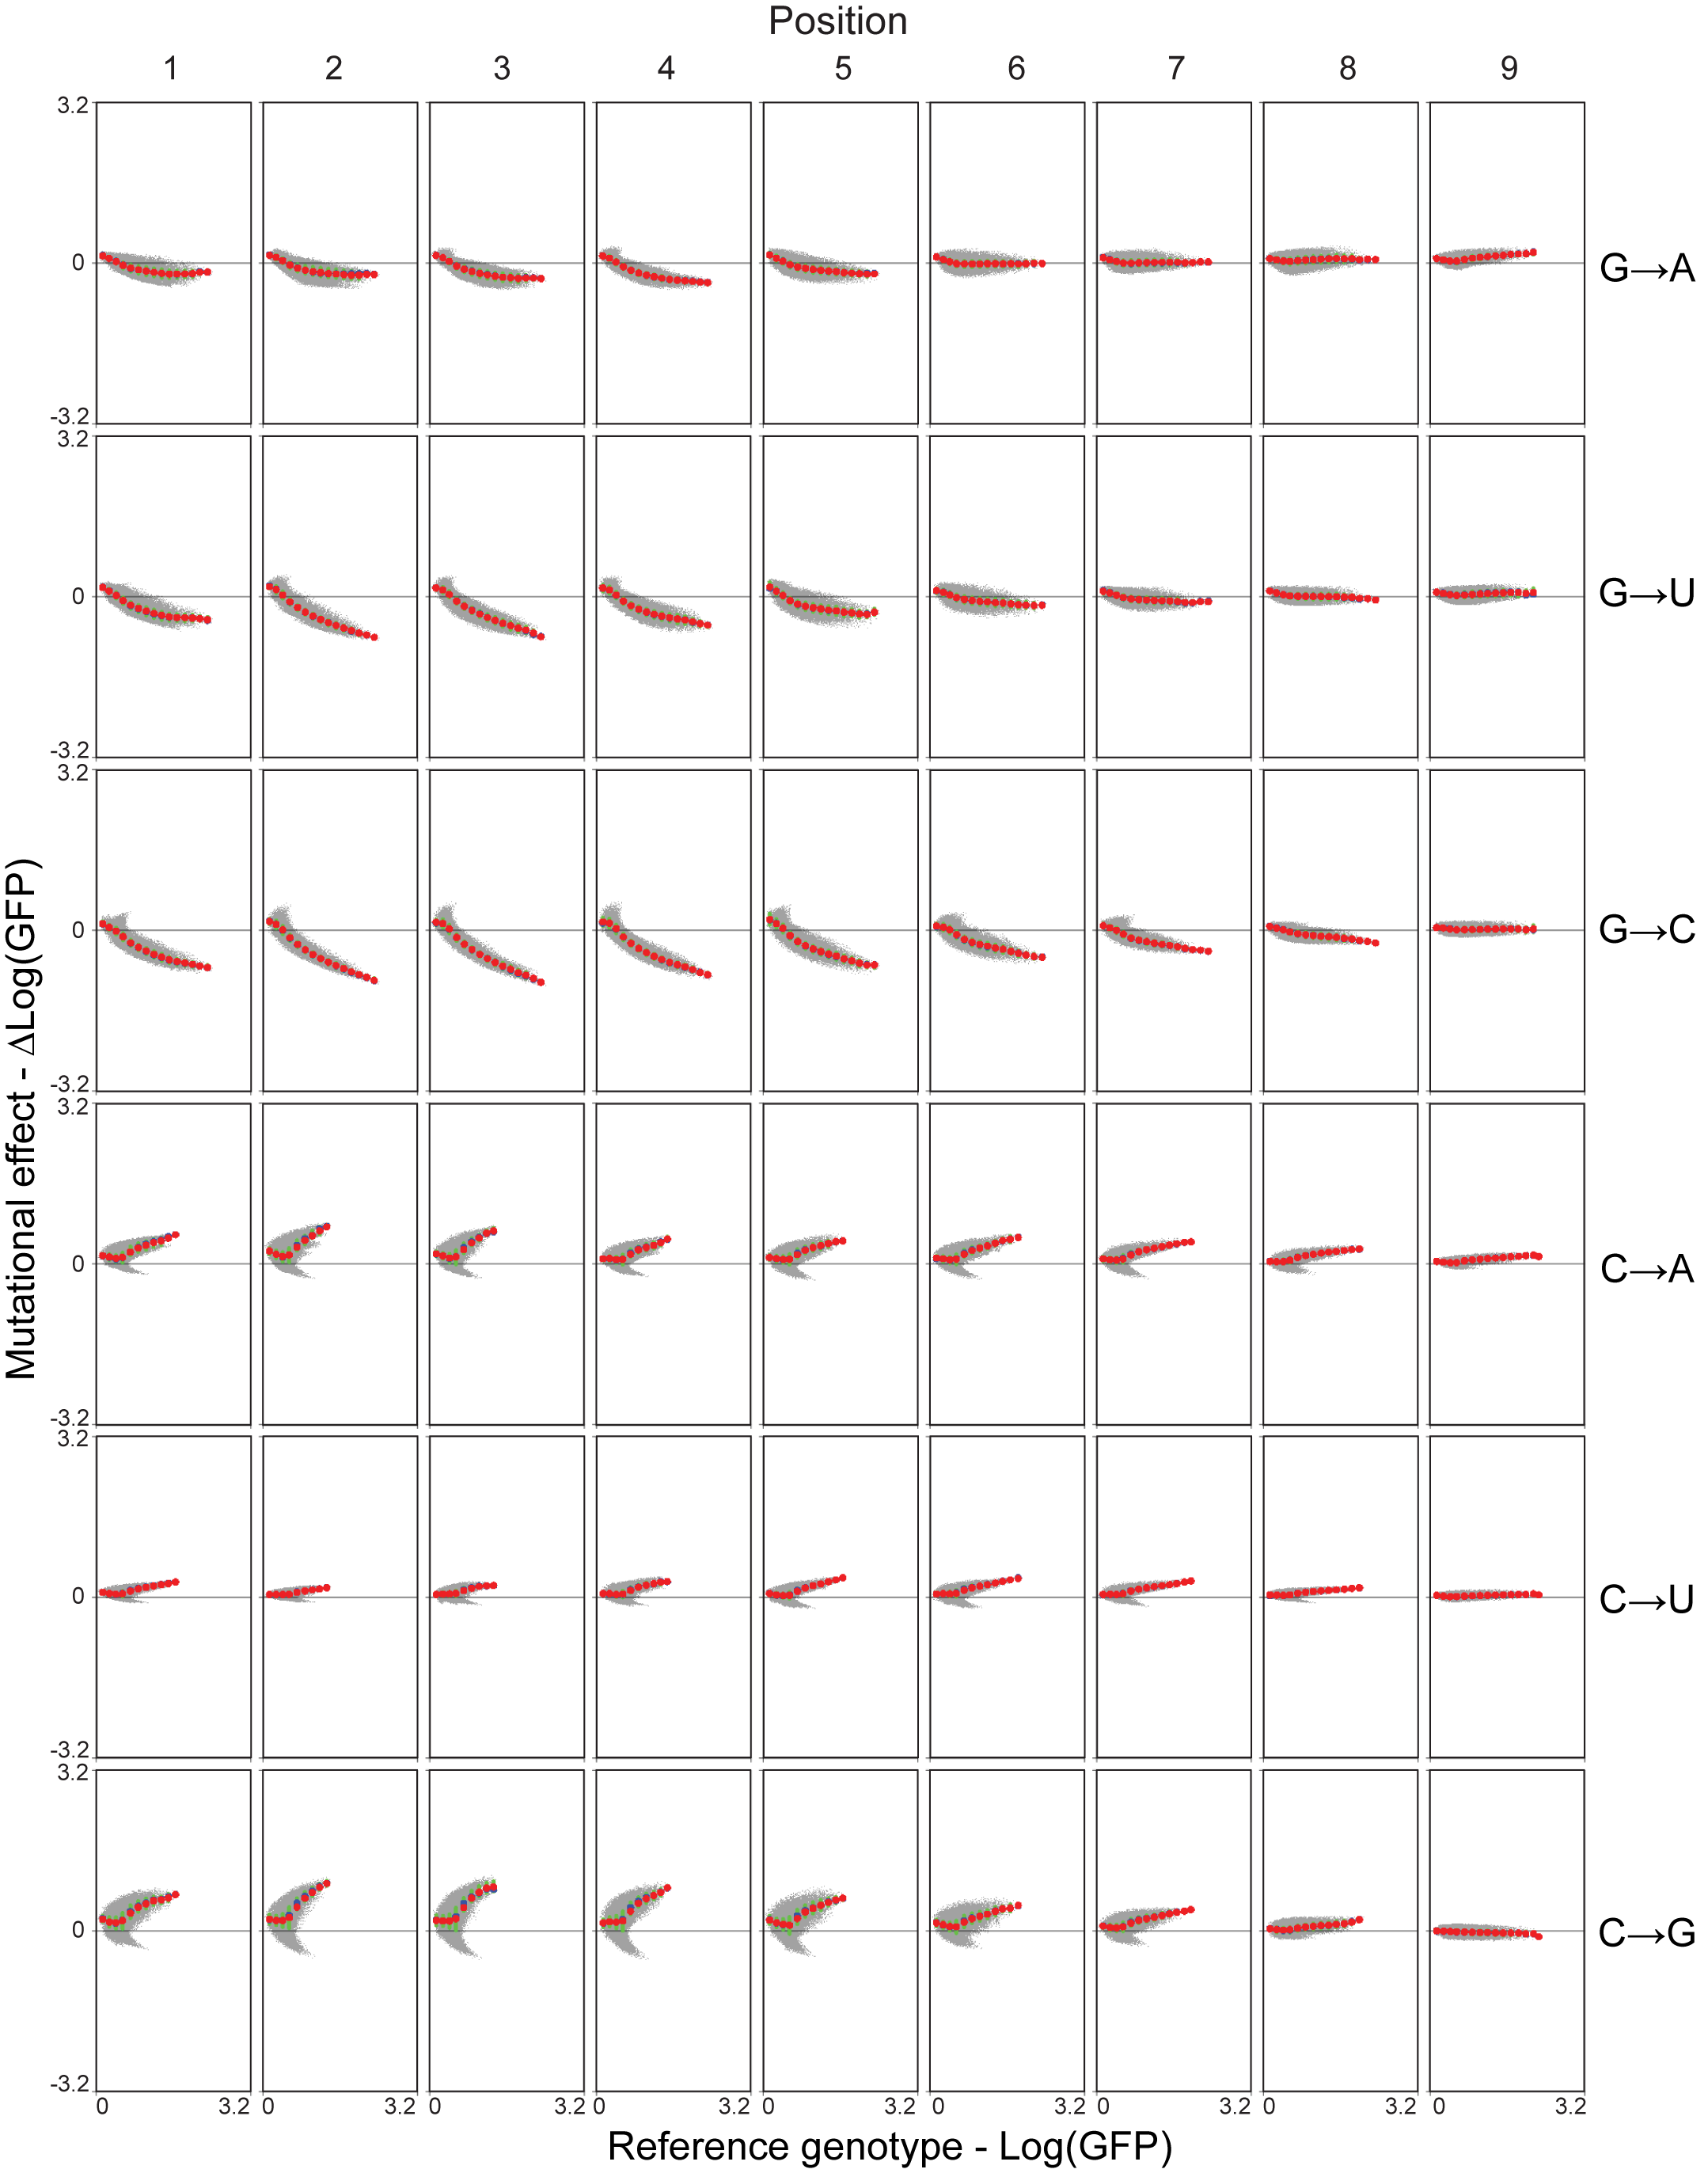


Supplemental Fig. S27. Fitness effects of G→A, G→U, G→C, C→A, C→U, and C→G mutations in FL*dmsC* predicted by the additive model. The relationships between the fitness (Log(GFP)) of a genotype and the predicted fitness effects of G→A, G→U, G→C, C→A, C→U, and C→G mutations in this genetic background are separately examined in terms of the nine nucleotide positions of SD. In each panel, genotypes are ranked by fitness and grouped into 20 equal-size bins. Group means, medians, and interquartile ranges are shown as red circles, blue circles, and green bars, respectively.


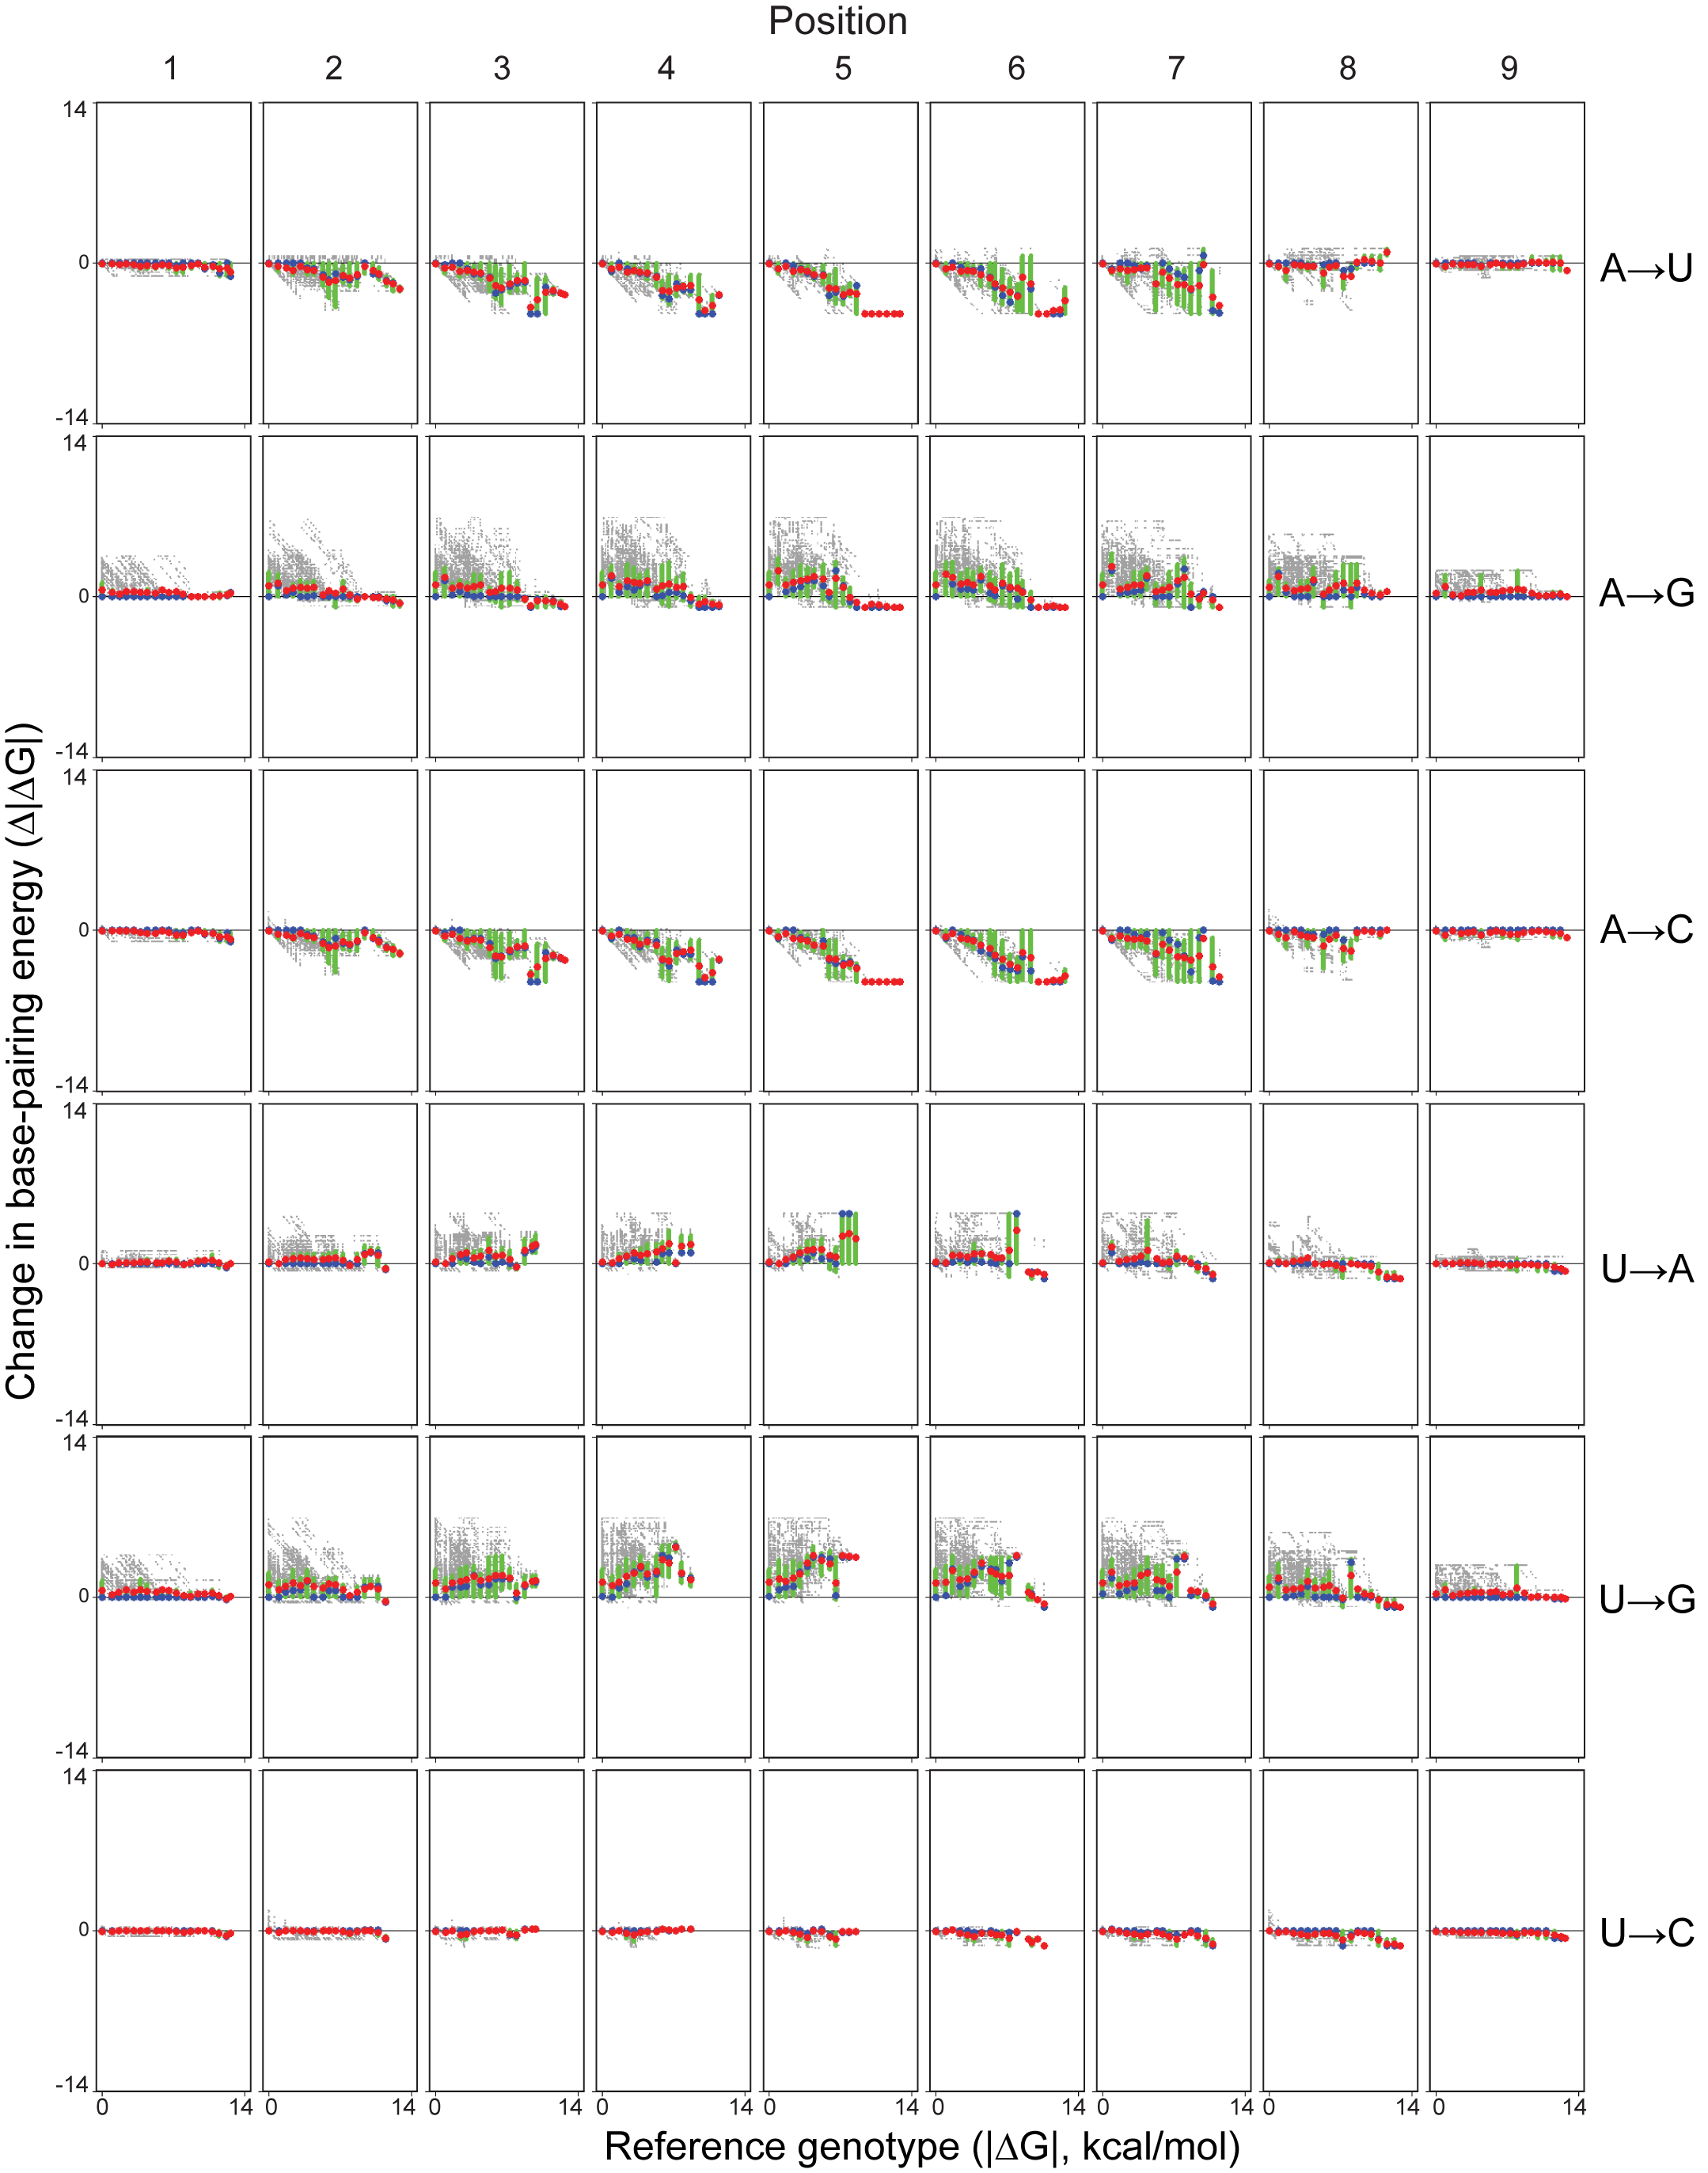


Supplemental Fig. S28. Impacts of A→U, A→G, A→C, U→A, U→G, and U→C mutations on SD:aSD base-pairing energy. Base-pairing energy (∆G, predicted values ≤ 0) is shown as an absolute values for simplicity. The relationships between the base-pairing energy of a SD genotype and the energy impacts (∆∆G) of A→U, A→G, A→C, U→A, U→G, and U→C mutations in this genetic background are separately examined in terms of the nine nucleotide positions of SD. In each panel, genotypes are ranked by base-pairing energy and grouped into 20 equal-size bins. Group means, medians, and interquartile ranges are shown as red circles, blue circles, and green bars, respectively.


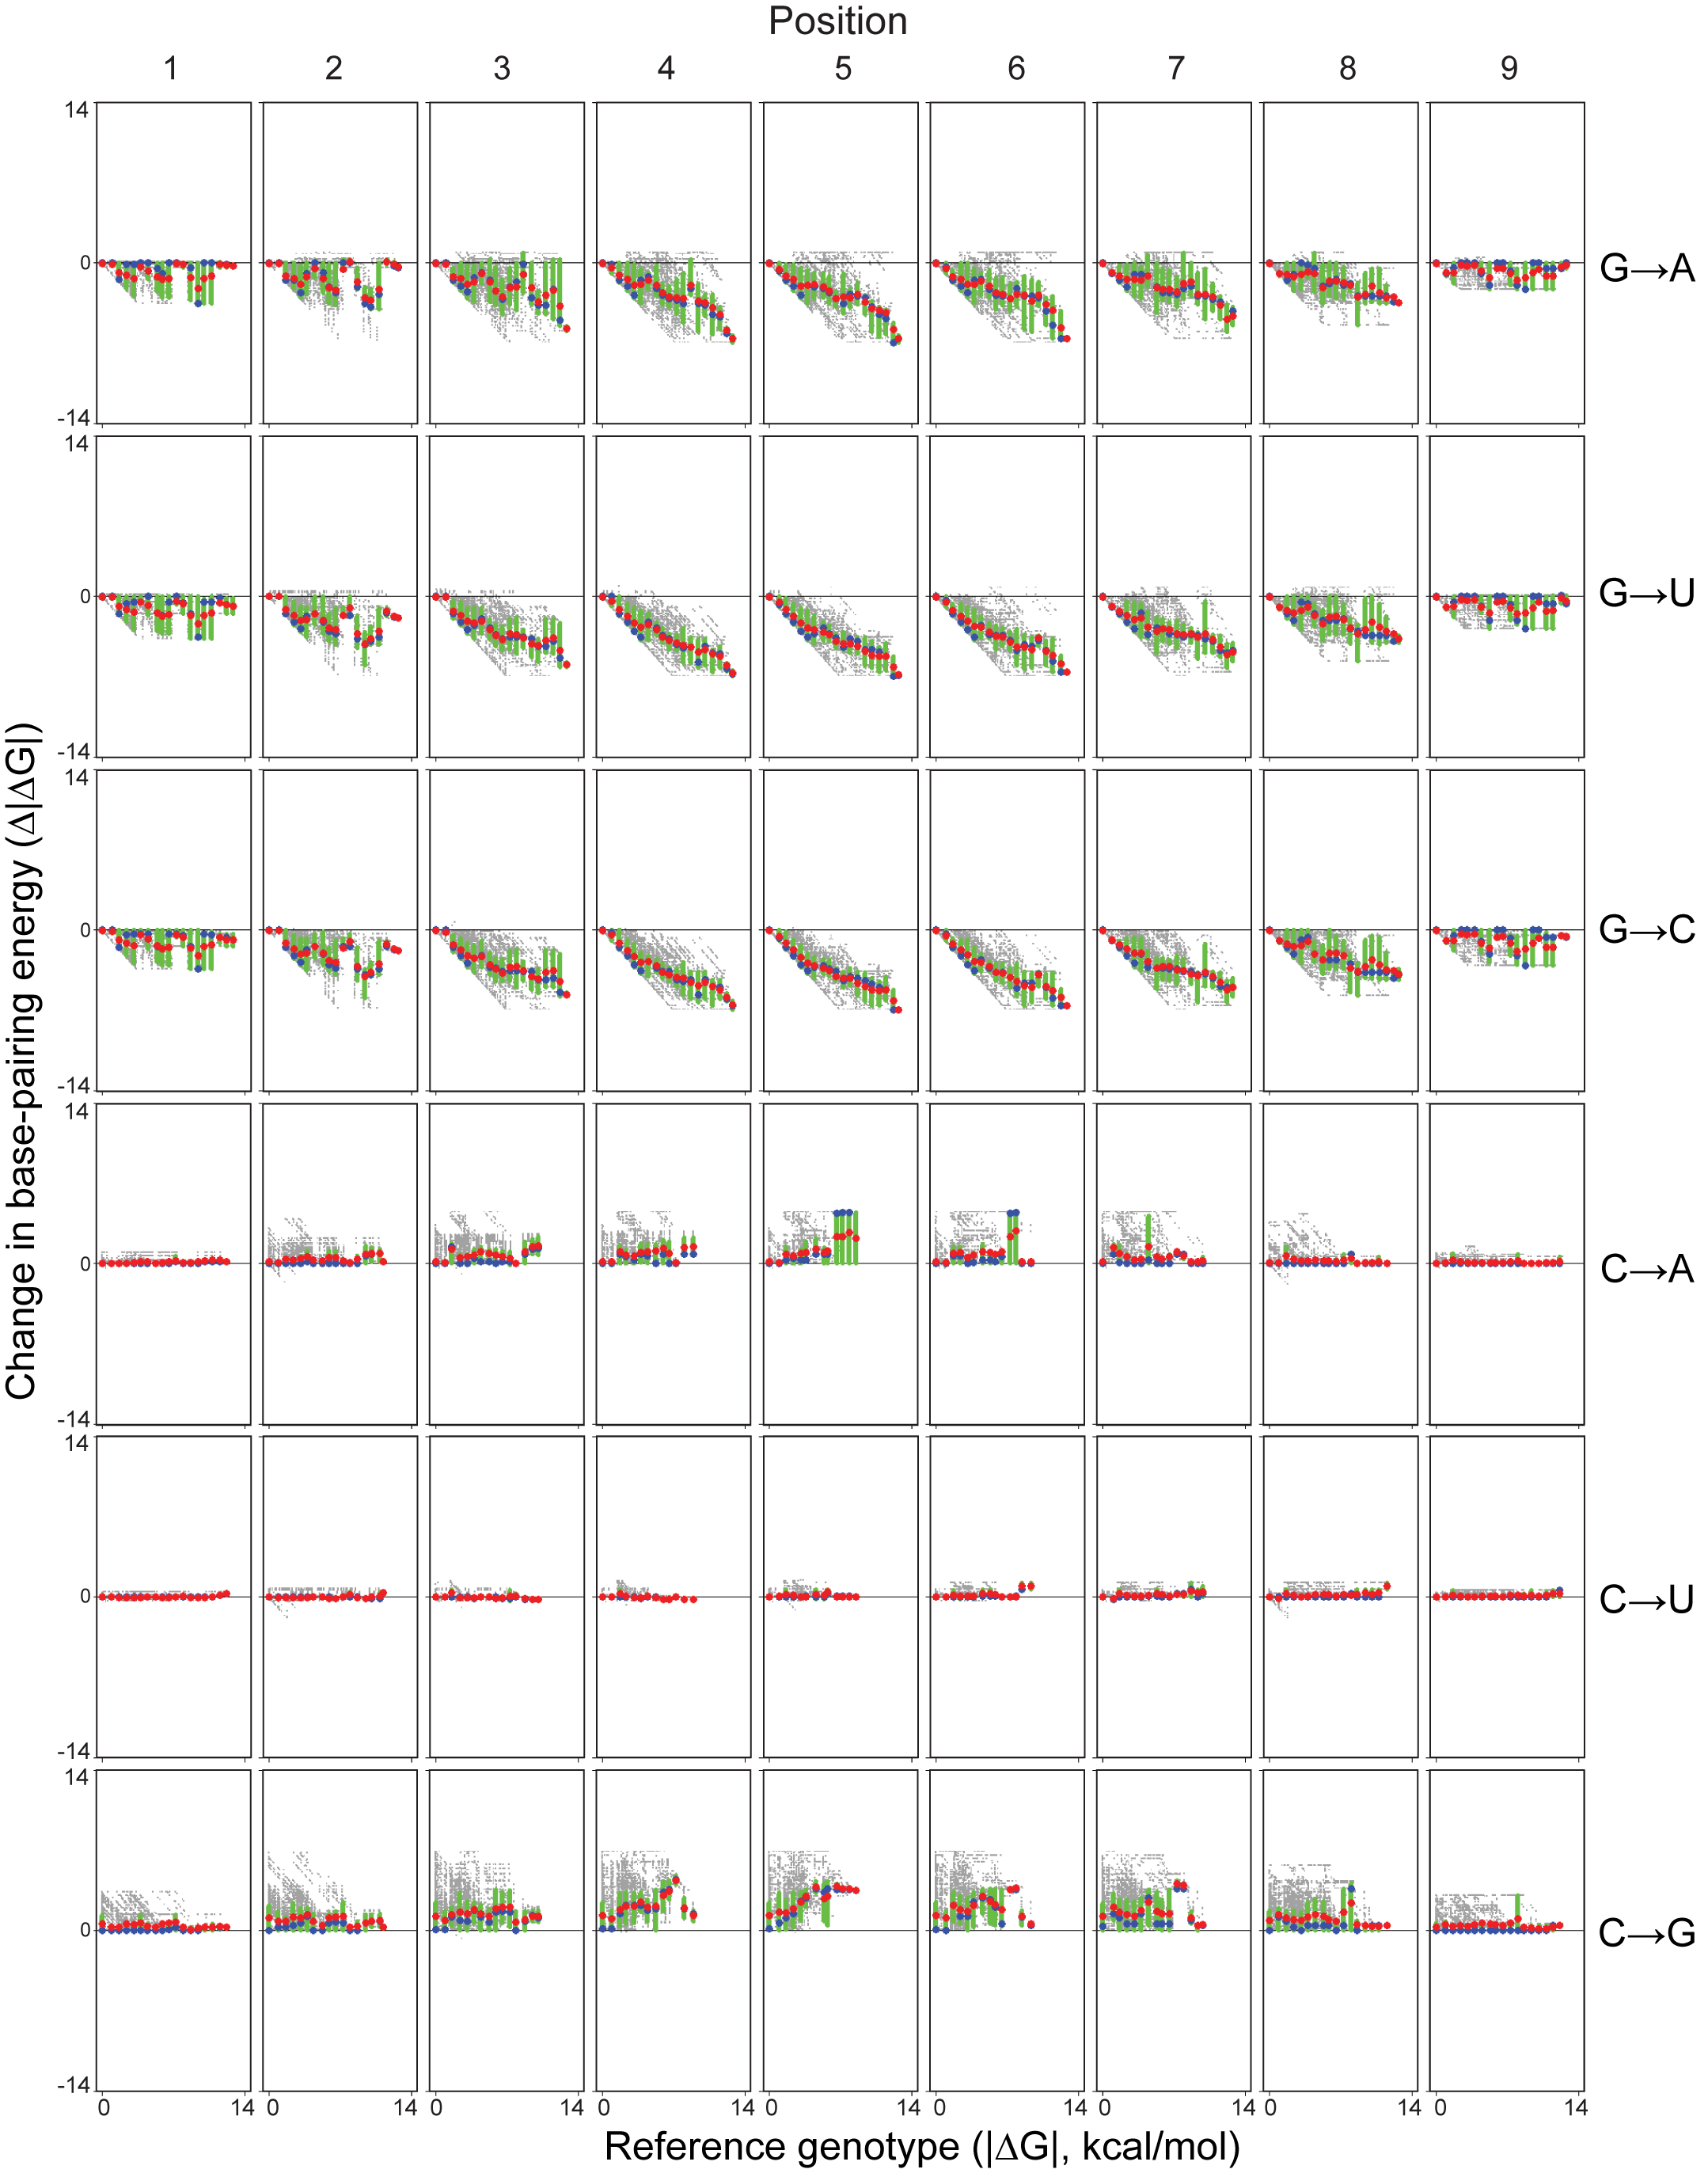


Supplemental Fig. S29. Impacts of G→A, G→U, G→C, C→A, C→U, and C→G mutations on SD:aSD base-pairing energy. Base-pairing energy (∆G, predicted values ≤ 0) is shown as an absolute value for simplicity. The relationships between the base-pairing energy of a SD genotype and the energy impacts (∆∆G) of G→A, G→U, G→C, C→A, C→U, and C→G mutations in this genetic background are separately examined in terms of the nine nucleotide positions of SD. In each panel, genotypes are ranked by base-pairing energy and grouped into 20 equal-size bins. Group means, medians, and interquartile ranges are shown as red circles, blue circles, and green bars, respectively.


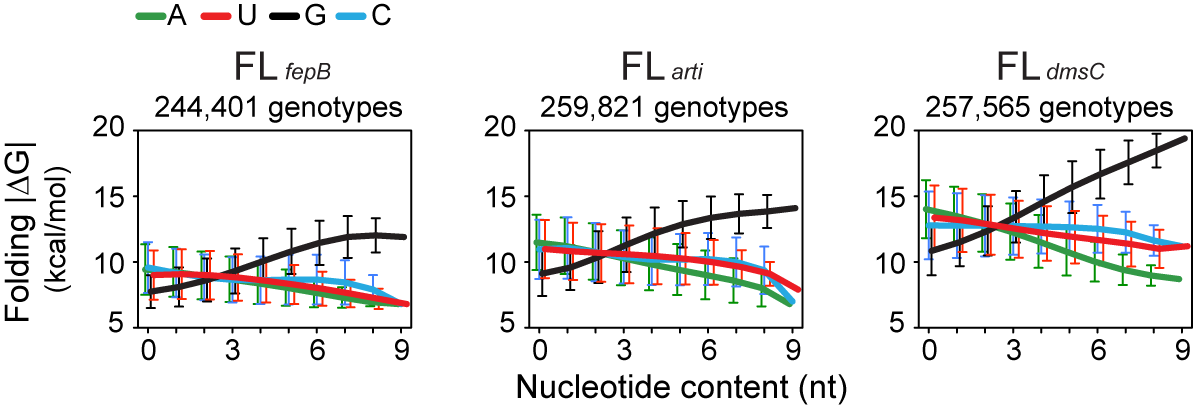


Supplemental Fig. S30. Relationship between the nucleotide content of SD and RNA folding energy within the 30-nt RBS region. SD genotypes are ranked by the amount of each nucleotide type and grouped into 10 bins (i.e. 0 to 9 nt). Lines and bars indicate group means and standard deviations of folding energy (∆G, predicted values ≤ 0; shown as absolute values for simplicity).


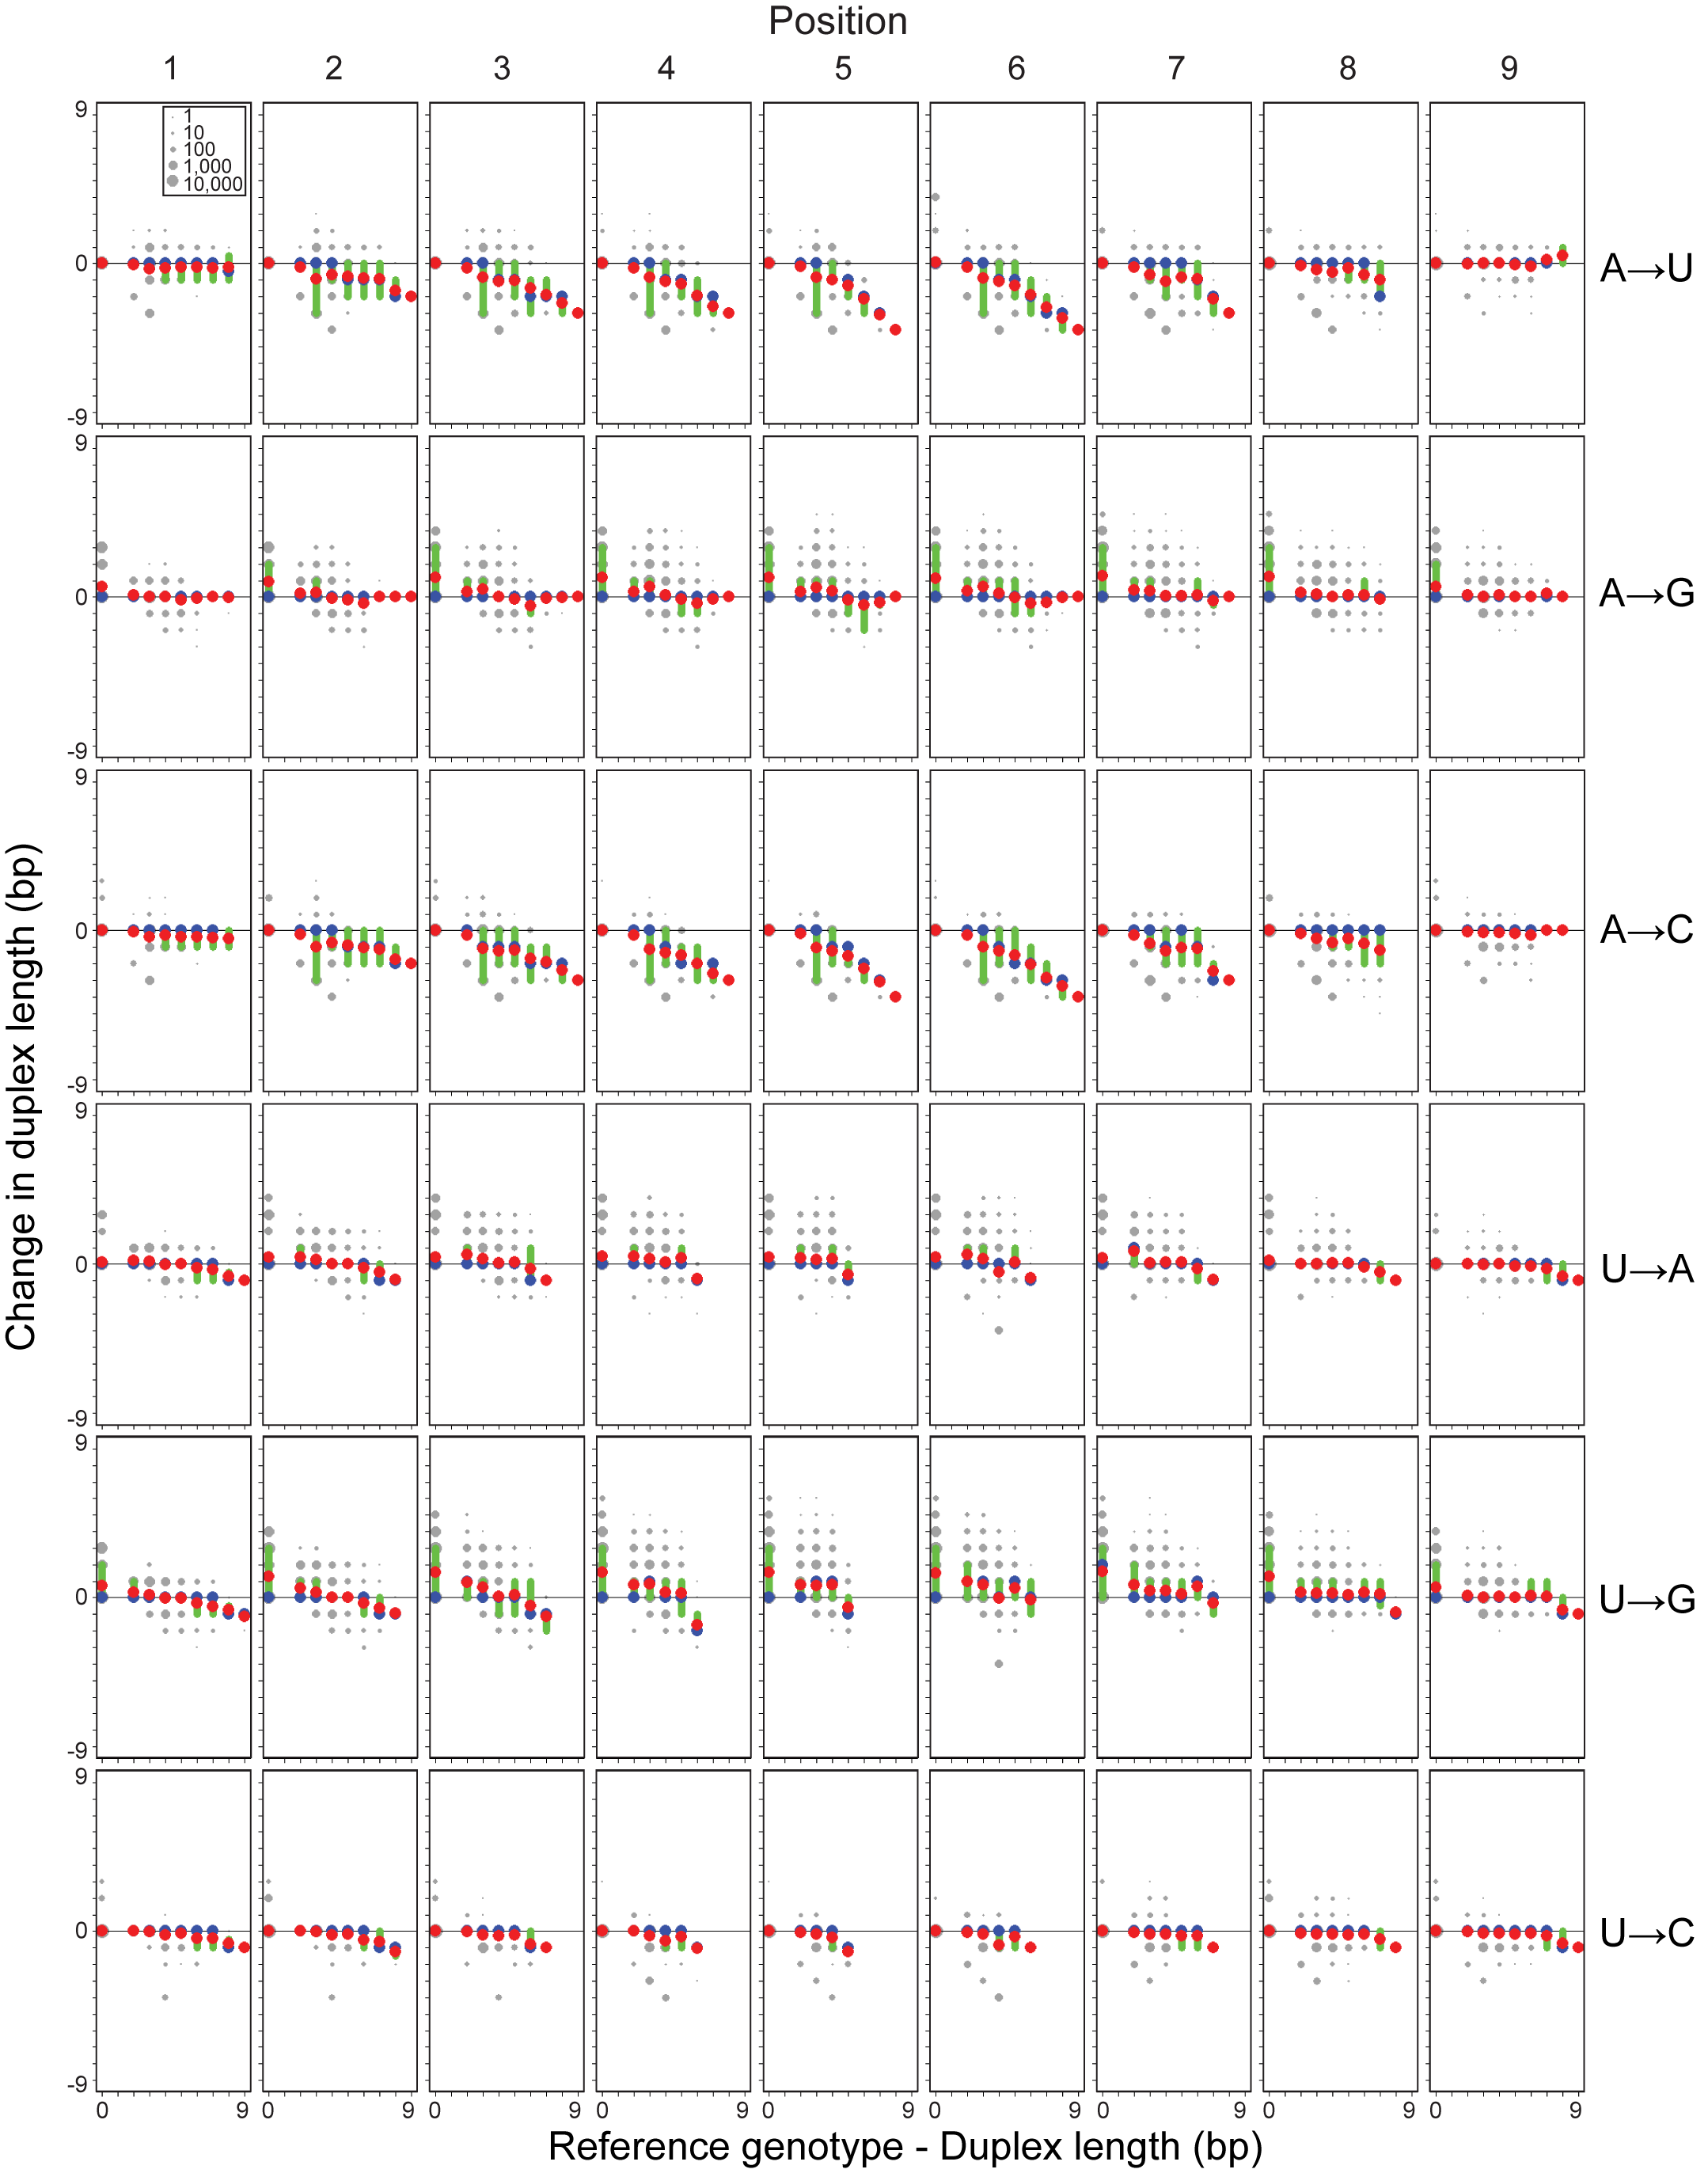


Supplemental Fig. S31. Impacts of A→U, A→G, A→C, U→A, U→G, and U→C mutations on the SD:aSD duplex length. The length (bp) of the longest uninterrupted SD:aSD duplex formed by each SD genotype is predicted by a RNA-folding algorithm (Lorenz et al. 2011). The relationships between the duplex length formed by a genotype and the impacts (i.e. changes in duplex length) of A→U, A→G, A→C, U→A, U→G, and U→C mutations in this genetic background are separately examined in terms of the nine nucleotide positions of SD. In each panel, genotypes are ranked by the duplex length and grouped into 10 bins (0 to 9 bp), and the amount of genotypes located at a given coordinate is indicated by the size of a grey circle. Group means, medians, and interquartile ranges are shown as red circles, blue circles, and green bars, respectively.


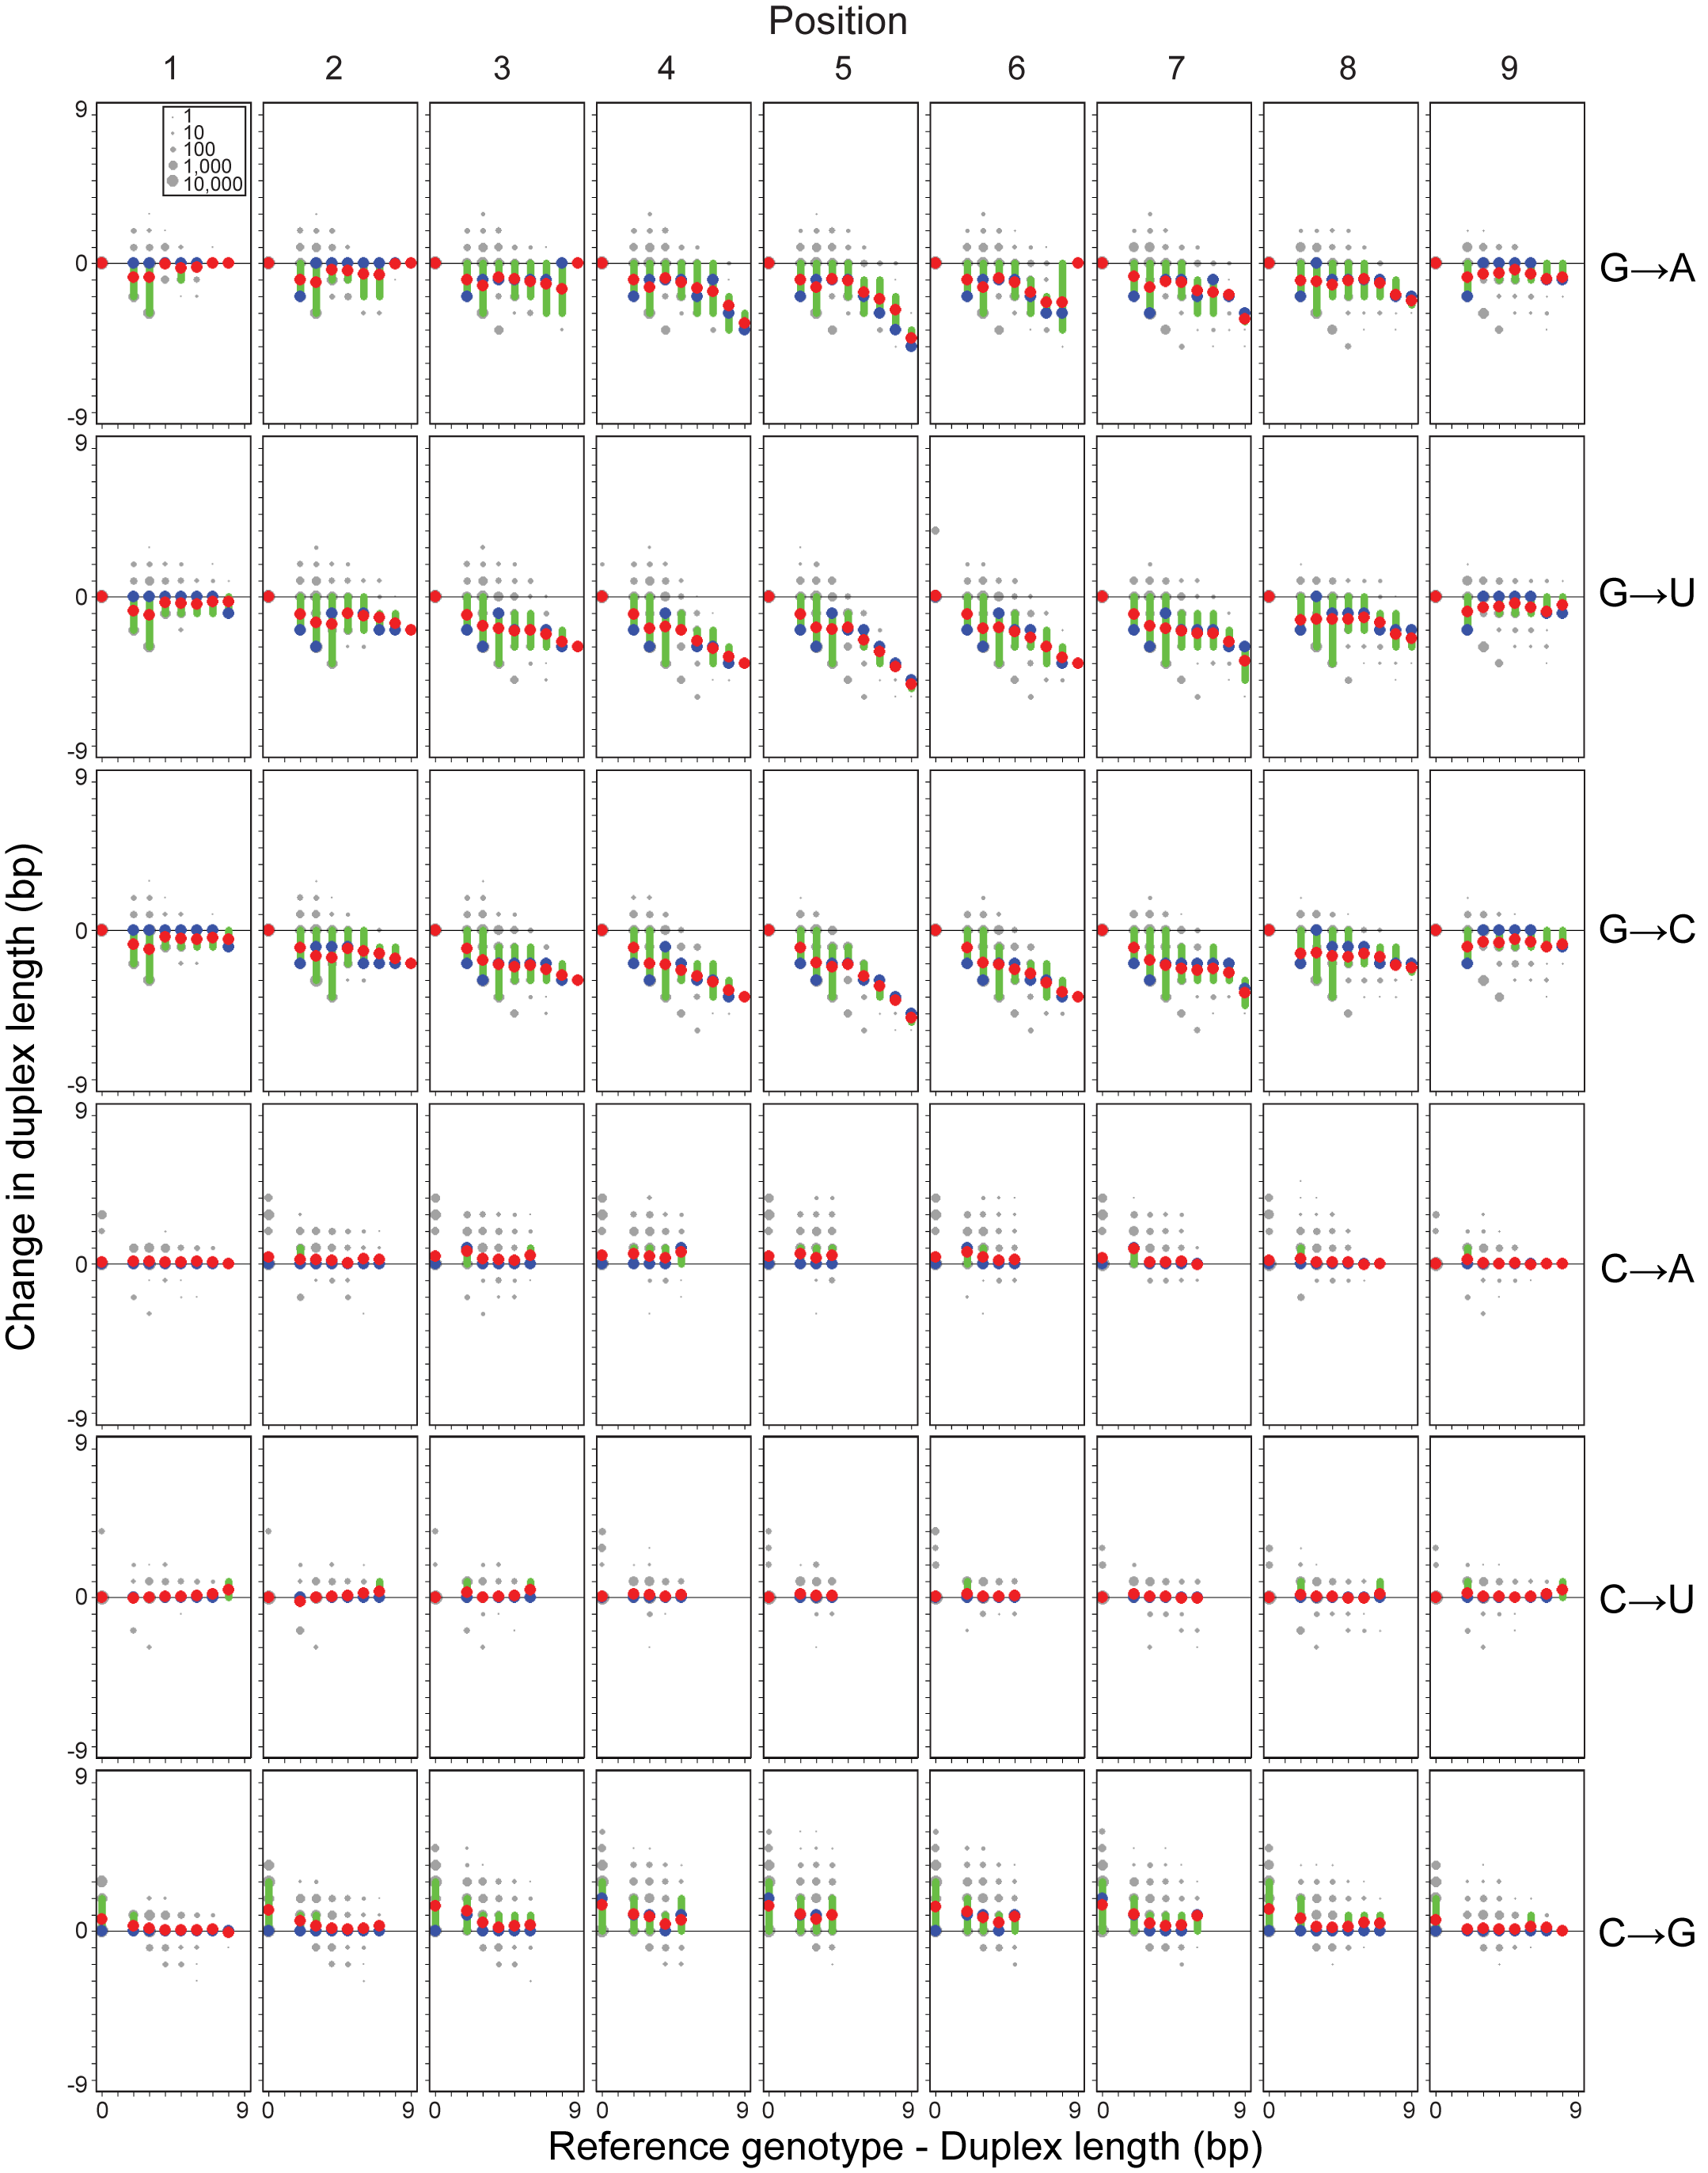


Supplemental Fig. S32. Impacts of G→A, G→U, G→C, C→A, C→U, and C→G mutations on the SD:aSD duplex length. The length (bp) of the longest uninterrupted SD:aSD duplex formed by each SD genotype is predicted by a RNA-folding algorithm (Lorenz et al. 2011). The relationships between the duplex length of a genotype and the impacts (i.e. changes in duplex length) of G→A, G→U, G→C, C→A, C→U, and C→G mutations in this genetic background are separately examined in terms of the nine nucleotide positions of SD. In each panel, genotypes are ranked by the duplex length and grouped into 10 bins (0 to 9 bp), and the amount of genotypes located at a given coordinate is indicated by the size of a grey circle. Group means, medians, and interquartile ranges are shown as red circles, blue circles, and green bars, respectively.

Supplemental Table S1. List of primers and oligonucleotides.

| Primer | Sequence (5’-3’) | Application |
| --- | --- | --- |
| HCEp165 | AATATTTGTTCTGGCGTCTGATTTTG | Construct EK222 |
| HCEp166 | GTCTATAGTCATGATGTCAAATGAACG | Construct EK222 |
| HCEp167 | GATTCTTTTCTCTGAGACGCCAG | Construct EK222 |
| HCEp168 | GCGTTGTGAAGAAATGTTATTTGC | Construct EK222 |
| K1 | CAGTCATAGCCGAATAGCCT | Construct EK222 |
| K2 | CGGTGCCCTGAATGAACTG | Construct EK222 |
| UA66p5 | GCTGGCAATTCCGACGT | Sanger sequencing |
| MV1 | GCAGGGCCCACTAGTGCA | Construct pHC162v |
| MV2 | GTCTGCAGGTCGACTCTAGTAAG | Construct pHC162v |
| UA139f | TTGGGCCCAAGCTTGTACGGGTTTTGCTGCCC | Construct pHC162v |
| UA139r | TTTGTCGACGCTAGCGGATCCGTGAAGACGA | Construct pHC162v |
| proDf | TCGACACGCGTTTACGGGCATGCATAAGGCTCGTATAATATATTCATTAATGGGAGACCACAACGGTTTCCCTCTACAAATAATTTTGTTT | Construct pHC163v |
| proDr | CTAGAAACAAAATTATTTGTAGAGGGAAACCGTTGTGGTCTCCCATTAATGAATATATTATACGAGCCTTATGCATGCCCGTAAACGCGTG | Construct pHC163v |
| WH4f | TAAGGAGGTTCCCAATGGTGAGCAAGGGCGAG | Construct pHC165v |
| WH4r | GAACTCTAGAAACAAAATTATTTGTAGAGGGAAAC | Construct pHC165v |
| RepA93Kf | AAGATTTTCCAGTGGACAAACTATGC | Construct pHC172v |
| RepA93r | AAAGCCTTTAACCAAAGGATTCC | Construct pHC172v |
| PA1f | CGCGTTATCAAAAAGAGTATTGACTTAAAGTCTAACCTATAGGATACTTACAGCCATCGAGAGGGAT | Construct pHC174v1 |
| PA1r | TAATCCCTCTCGATGGCTGTAAGTATCCTATAGGTTAGACTTTAAGTCAATACTCTTTTTGATAA | Construct pHC174v1 |
| VSSR12-SD9 | AATCTAGAACCTTAAGGAGGTTAAGAATGGTGAGCAAGGG | Construct pHC199v |
| VSSR12-SD6 | AATCTAGAACCTATAGGAGGATAAGAATGGTGAGCAAGGG | Construct pHC198v |
| VSSR12-SD5 | AATCTAGAACCTATAGGAGCATAAGAATGGTGAGCAAGGG | Construct pHC202v |
| UA66p4 | CGGATCTGCGATTCTGATAACA | Construct pHC199v |
| GFPmut2f | AATCTAGAACCTTAAGGAGGTTAAGAATGAGTAAAGGAGAAGAACTTTTCAC | Construct pHC200 |
| GFPmut2r | AACTCGAGCAGGTCTGGACATTTATTTGTAC | Construct pHC200 |
| YC04p1 | AGGTGAGGAACTGTTCACTGGAGTTGTCCCAATTC | Construct pYC04 |
| YC04p2 | TTGGACATTCTTAACCTCCTTAAGGTTCTAGAAAC | Construct pYC04 |
| YC09p1 | GGTTGATTTATGTCCAAAGGTGAG | Construct pYC09 |
| YC09p2 | TCCTTATATTAATAAGGTTAATCTAGAAACAAAATTATTTG | Construct pYC09 |
| YC12p1 | AGGAGGTGTGAGATGTCCAAAGGTGA | Construct pYC20 |
| YC12p2 | TCGGGTTTGCCAGATAGCTCTAGAAACAAAATTATTTG | Construct pYC20 |
| YC21p1 | TAAGAATGTCCAAAGGTG | Construct FL*arti* variants |
| TK03p1 | TGGAGGAATAGGTTCTAGAAACAAAATTATTTGTAGAGG | Construct pTK03 |
| TK05p1 | GGTAATAAGAATGTCCAAAGGTGAGGAACTG | Construct pTK05 |
| YC19p2 | TCTCAGGTTCTAGAAACAAAATTATTTGTAGAGGGAAAC | Construct pTK05 |
| TK06p2 | TCTTATGGAGGAATAGGTTCTAGAAACAAAATTATTTGTAGAGGGA | Construct pTK06 |
| YL13p1 | ATGGTGAGCAAGGGCGA | Construct pTK06 |
| YC23p1 | TAAGAATGTCCAAAGGTGAGGAAC | Construct FL*arti* variants |
| YC24p1 | TGATTTATGTCCAAAGGTGAGGA | Construct FL*fepB* variants |
| YC26p1 | TGAGATGTCCAAAGGTGAGG | Construct FL*dmsC* variants |
| YC28p1 | TTTTTTTTTTATTAATAAGGTTAATCTAGAAACAAAATTATTTGTAGA | Construct pYC30 |
| YC29p1 | AAAAAAAAATATTAATAAGGTTAATCTAGAAACAAAATTATTTGTAGA | Construct pYC29 |
| YC30p1 | TAATTTATGTCCAAAGGTGAGGAAC | Construct pYC31 |
| YC32p1 | TACCATACCCGGGTTTGCCAGATAGCT | Construct pYC32 |
| YC33p1 | ACCCCCGAACGGGTTTGCCAGATAGCT | Construct pYC33 |
| YC34p1 | GCTTCCTGTTATTAATAAGGTTAATCTAGAAACAAAATTATTTGTAGA | Construct pYC34 |
| YC36p1 | AACCCCTTATATTAATAAGGTTAATCTAGAAACAAAATTATTTGTAGAG | Construct pYC36 |
| YC37p1 | CCTCCATCGCGGGTTTGCCAGATAGCT | Construct pYC37 |
| YC38p1 | CCCCCTCTTAGGTTCTAGAAACAAAATTATTTGTAGAGG | Construct pYC38 |
| YC39p1 | CCCCCCCCCAGGTTCTAGAAACAAAATTATTTGTAGAGG | Construct pYC39 |
| YC40p1 | CCCCCCCCCTATTAATAAGGTTAATCTAGAAACAAAATTATTTGTAGAG | Construct pYC40 |
| YC41p1 | CCCCCCCCCCGGGTTTGCCAGATAGCT | Construct pYC41 |
| YC42p1 | CACACCACCTATTAATAAGGTTAATCTAGAAACAAAATTATTTGTAGAG | Construct pYC42 |
| YC43p1 | TCTATCCGGTATTAATAAGGTTAATCTAGAAACAAAATTATTTGTAGAG | Construct pYC43 |
| YC44p1 | TCCACCCTCCGGGTTTGCCAGATAGCT | Construct pYC44 |
| YC45p1 | CTTACCATTCGGGTTTGCCAGATAGCT | Construct pYC45 |
| YC46p1 | AGCCCCCCGCGGGTTTGCCAGATAGCT | Construct pYC46 |
| TK39p1 | AAAAACAAATATTAATAAGGTTAATCTAGAAACAAAATTATTTGTAGAG | Construct pTK39 |
| TK40p1 | TGGAGGAATTATTAATAAGGTTAATCTAGAAACAAAATTATTTGTAGAG | Construct pTK40 |
| TK41p1 | AAACACAAATATTAATAAGGTTAATCTAGAAACAAAATTATTTGTAGAG | Construct pTK41 |
| TK42p1 | CAAAACAAATATTAATAAGGTTAATCTAGAAACAAAATTATTTGTAGAG | Construct pTK42 |
| TK43p1 | CAACACAAATATTAATAAGGTTAATCTAGAAACAAAATTATTTGTAGAG | Construct pTK43 |
| YC09SDRf | NNNNNTGATTTATGTCCAAAGGTG | Construct the FL*fepB* library |
| YC09SDRr | NNNNTATTAATAAGGTTAATCTAGAAACAAA | Construct the FL*fepB* library |
| YC08SDRf | NNNNNTAAGAATGTCCAAAGGTGAGGA | Construct the FL*arti* library |
| YC08SDRr | NNNNAGGTTCTAGAAACAAAATTATTTGTAGAG | Construct the FL*arti* and FL*arti*-Y libraries |
| YC12SDRf | NNNNNTGAGATGTCCAAAGGTGAGG | Construct the FL*dmsC* library |
| YC12SDRr | NNNNCGGGTTTGCCAGATAGCT | Construct the FL*dmsC* library |
| 199vSDRf | NNNNNTAAGAATGGTGAGCAAGG | Construct the FL*arti*-Y library |
| ILp2 | GTCTCGTGGGCTCGGAGATGTGTATAAGAGACAGGCTTCCCAACCTTACCAGAGG | Amplicon PCR of the FL*fepB*, FL*arti*, and FL*dmsC* libraries |
| ILp6 | TCGTCGGCAGCGTCAGATGTGTATAAGAGACAGGAACAGTTCCTCACCTTTGGACAT | Amplicon PCR of the FL*fepB*, FL*arti*, and FL*dmsC* libraries |
| ILp6a | TCGTCGGCAGCGTCAGATGTGTATAAGAGACAGNGAACAGTTCCTCACCTTTGGACAT | Amplicon PCR of the FL*fepB*, FL*arti*, and FL*dmsC* libraries |
| ILp6b | TCGTCGGCAGCGTCAGATGTGTATAAGAGACAGNNGAACAGTTCCTCACCTTTGGACAT | Amplicon PCR of the FL*fepB*, FL*arti*, and FL*dmsC* libraries |
| ILp6c | TCGTCGGCAGCGTCAGATGTGTATAAGAGACAGNNNGAACAGTTCCTCACCTTTGGACAT | Amplicon PCR of the FL*fepB*, FL*arti*, and FL*dmsC* libraries |
| IL1 | TCGTCGGCAGCGTCAGATGTGTATAAGAGACAGCCTCGCCCTTGCTCACCAT | Amplicon PCR of the FL*arti*-Y library |
| IL1a | TCGTCGGCAGCGTCAGATGTGTATAAGAGACAGNCCTCGCCCTTGCTCACCAT | Amplicon PCR of the FL*arti*-Y library |
| IL1b | TCGTCGGCAGCGTCAGATGTGTATAAGAGACAGNNCCTCGCCCTTGCTCACCAT | Amplicon PCR of the FL*arti*-Y library |
| IL1c | TCGTCGGCAGCGTCAGATGTGTATAAGAGACAGNNNCCTCGCCCTTGCTCACCAT | Amplicon PCR of the FL*arti*-Y library |
| YLEp5 | TGGGCACAAATTTTCTGTCAG | *gfp* qPCR |
| YLEp6 | CGCGAAAGTAGTGACAAGTG | *gfp* qPCR |
| YLEp7 | CGAAGTTGGTGTTGACGTTG | *gapA* qPCR |
| YLEp8 | TGTTGTCTTTAGACGGACCAG | *gapA* qPCR |
| 5’ handle | Cy5-GAGACGCCCGGGCTGCAG-Biotin | Single-molecule FRET |
| 3’ handle | CCCCAGACGCAUUGCGUUCUGUACAG-Cy3 | Single-molecule FRET |

Supplemental Table S2. Plasmid list.

| Plasmid | Description | fRBS sequence (upstream_SD_downstream) |
| --- | --- | --- |
| pUA139 | RBS*-gfpmut2*-t*rrnB*, oriVpSC101, aKmr | UACCCAUGGUAUGGA_UGAAUUGUA_CAAAUA |
| pHC161v | P*tacA*-RBS-*venus*-tT7, P*sacB*-*sacB*, oriTRP4 , oriVR6K , bCmr | CCUCAUAUGUCUAGA_AGGGAGAGA_CCCCGA |
| pHC162v | P*tacA*-RBS-*venus*- tT7, oriVpSC101, Kmr | CCUCAUAUGUCUAGA_AGGGAGAGA_CCCCGA |
| pHC162s | oriVpSC101, Kmr |  |
| pHC163v | PproD-leader-RBS-*venus*-tT7, oriVpSC101, Kmr | AAUUUUGUUUCUAGA_AGGGAGAGA_CCCCGA |
| pHC165v | PproD-leader-RBS-*venus*-tT7, oriVpSC101, Kmr | UUUGUUUCUAGAGUUC_UAAGGAGGU_UCCCA |
| pHC172v | PproD-leader-RBS-*venus*-tT7, coriVpSC101v2, Kmr | UUUGUUUCUAGAGUUC_UAAGGAGGU_UCCCA |
| pHC174v1 | PA1-leader-RBS-*venus*-tT7, oriVpSC101v2, Kmr | UUUGUUUCUAGAGUUC_UAAGGAGGU_UCCCA |
| pHC174v2 | dPA1v2-leader-RBS-*venus*-tT7, oriVpSC101v2, Kmr | UUUGUUUCUAGAGUUC_UAAGGAGGU_UCCCA |
| pHC198v | PA1v2-leader-RBS-*venus*-tT7, oriVpSC101v2, Kmr | UUUGUUUCUAGAACCU_AUAGGAGGA _UAAGA |
| pHC199v | PA1v2-leader-RBS-*venus*-tT7, oriVpSC101v2, Kmr | UUUGUUUCUAGAACCU_UAAGGAGGU_UAAGA |
| pHC200 | PA1v2-leader-RBS *gfpmut2*-tT7, oriVpSC101v2, Kmr | UUUGUUUCUAGAACCU_UAAGGAGGU_UAAGA |
| pHC202v | PA1v2-leader-RBS-*venus*-tT7, oriVpSC101v2, Kmr | UUUGUUUCUAGAACCU_AUAGGAGCA_UAAGA |
| pTK03 | PA1v2-leader-RBS-e*gfpmut2*v2-tT7, oriVpSC101, Kmr | UUUGUUUCUAGAACCU_AUUCCUCCA_UAAGA |
| pTK05 | PA1v2-leader-RBS-*gfpmut2*v2-tT7, oriVpSC101, Kmr | UUUGUUUCUAGAACCU_GAGAGGUAA_UAAGA |
| pTK06 | PA1v2-leader-RBS-*venus*-tT7, oriVpSC101v2, Kmr | UUUGUUUCUAGAACCU_AUUCCUCCA_ UAAGA |
| pTK39 | PA1v2-leader-RBS-*gfpmut2*v2-tT7, oriVpSC101, Kmr | UUAACCUUAUUAAUA_UUUGUUUUU_UGAUUU |
| pTK40 | PA1v2-leader-RBS-*gfpmut2*v2-tT7, oriVpSC101, Kmr | UUAACCUUAUUAAUA_AUUCCUCCA_UGAUUU |
| pTK41 | PA1v2-leader-RBS-*gfpmut2*v2-tT7, oriVpSC101, Kmr | UUAACCUUAUUAAUA_UUUGUGUUU_UGAUUU |
| pTK42 | PA1v2-leader-RBS-*gfpmut2*v2-tT7, oriVpSC101, Kmr | UUAACCUUAUUAAUA_UUUGUUUUG_UGAUUU |
| pTK43 | PA1v2-leader-RBS-*gfpmut2*v2-tT7, oriVpSC101, Kmr | UUAACCUUAUUAAUA_UUUGUGUUG_UGAUUU |
| pYC01 | PproD-leader-RBS-*gfpmut2*-tT7, oriVpSC101v2, Kmr | UUUGUUUCUAGAACCU_UAAGGAGGU_UAAGA |
| pYC04 | PproD-leader-RBS-*gfpmut2*v2-tT7, oriVpSC101v2, Kmr | UUUGUUUCUAGAACCU_UAAGGAGGU_UAAGA |
| pYC05 | PA1v2-leader-RBS-*gfpmut2*v2-tT7, oriVpSC101v2, Kmr | UUUGUUUCUAGAACCU_UAAGGAGGU_UAAGA |
| pYC06 | PproD -leader-RBS-*gfpmut2*v2-tT7, oriVpSC101, Kmr | UUUGUUUCUAGAACCU_UAAGGAGGU_UAAGA |
| pYC08 | PA1v2-leader-RBS-*gfpmut2*v2-tT7, oriVpSC101, Kmr | UUUGUUUCUAGAACCU_UAAGGAGGU_UAAGA |
| pYC09 | PA1v2-leader-RBS-*gfpmut2*v2-tT7, oriVpSC101, Kmr | UUAACCUUAUUAAUA_ACAGGAAGC_UGAUUU |
| pYC20 | PA1v2-leader-RBS-*gfpmut2*v2-tT7, oriVpSC101, Kmr | GCUAUCUGGCAAACCCG_AAGGAGGUG_UGAG |
| pYC28 | PA1v2-leader-RBS-*gfpmut2*v2-tT7, oriVpSC101, Kmr | UUAACCUUAUUAAUA_AAAAAAAAA_UGAUUU |
| pYC29 | PA1v2-leader-RBS-*gfpmut2*v2-tT7, oriVpSC101, Kmr | UUAACCUUAUUAAUA_UUUUUUUUU_UGAUUU |
| pYC30 | PA1v2-leader-RBS-*gfpmut2*v2-tT7, oriVpSC101, Kmr | UUAACCUUAUUAAUA_AAAAAAAAA_UAAUUU |
| pYC31 | PA1v2-leader-RBS-*gfpmut2*v2-tT7, oriVpSC101, Kmr | UUAACCUUAUUAAUA_UUUUUUUUU_UAAUUU |
| pYC32 | PA1v2-leader-RBS-*gfpmut2*v2-tT7, oriVpSC101, Kmr | GCUAUCUGGCAAACCCG_GGUAUGGUA_UGAG |
| pYC33 | PA1v2-leader-RBS-*gfpmut2*v2-tT7, oriVpSC101, Kmr | GCUAUCUGGCAAACCCG_UUCGGGGGU_UGAG |
| pYC34 | PA1v2-leader-RBS-*gfpmut2*v2-tT7, oriVpSC101, Kmr | UUAACCUUAUUAAUA_ACAGGAAGC_UGAUUU |
| pYC36 | PA1v2-leader-RBS-*gfpmut2*v2-tT7, oriVpSC101, Kmr | UUAACCUUAUUAAUA_UAAGGGGUU_UGAUUU |
| pYC37 | PA1v2-leader-RBS-*gfpmut2*v2-tT7, oriVpSC101, Kmr | GCUAUCUGGCAAACCCG _CGAUGGAGG_ UGAG |
| pYC38 | PA1v2-leader-RBS-*gfpmut2*v2-tT7, oriVpSC101, Kmr | UUUGUUUCUAGAACCU_AAGAGGGGG_UAAGA |
| pYC39 | PA1v2-leader-RBS-*gfpmut2*v2-tT7, oriVpSC101, Kmr | UUUGUUUCUAGAACCU_GGGGGGGGG_UAAGA |
| pYC40 | PA1v2-leader-RBS-*gfpmut2*v2-tT7, oriVpSC101, Kmr | UUAACCUUAUUAAUA_GGGGGGGGG_UGAUUU |
| pYC41 | PA1v2-leader-RBS-*gfpmut2*v2-tT7, oriVpSC101, Kmr | GCUAUCUGGCAAACCCG_GGGGGGGGG_UGAG |
| pYC42 | PA1v2-leader-RBS-*gfpmut2*v2-tT7, oriVpSC101, Kmr | UUAACCUUAUUAAUA_GGUGGUGUG_UGAUUU |
| pYC43 | PA1v2-leader-RBS-*gfpmut2*v2-tT7, oriVpSC101, Kmr | UUAACCUUAUUAAUA_CCGGAUAGA_UGAUUU |
| pYC44 | PA1v2-leader-RBS-*gfpmut2*v2-tT7, oriVpSC101, Kmr | GCUAUCUGGCAAACCCG_GAGGGUGGA_UGAG |
| pYC45 | PA1v2-leader-RBS-*gfpmut2*v2-tT7, oriVpSC101, Kmr | GCUAUCUGGCAAACCCG_AAUGGUAAG_UGAG |
| pYC46 | PA1v2-leader-RBS-*gfpmut2*v2-tT7, oriVpSC101, Kmr | GCUAUCUGGCAAACCCG_CGGGGGGCU_UGAG |
| pLK170505v1 | PA1v2-leader-RBS-*gfpmut2*v2-tT7, oriVpSC101, Kmr | UUAACCUUAUUAAUA_UGAGAGGUA_UGAUUU |
| pLK170110v6 | PA1v2-leader-RBS-*gfpmut2*v2-tT7, oriVpSC101, Kmr | UUUGUUUCUAGAACCU_GCUCAGGGU_UAAGA |
| pLK170110v7 | PA1v2-leader-RBS-*gfpmut2*v2-tT7, oriVpSC101, Kmr | UUUGUUUCUAGAACCU_CGCGGGAUA_UAAGA |
| pLK170110v12 | PA1v2-leader-RBS-*gfpmut2*v2-tT7, oriVpSC101, Kmr | UUUGUUUCUAGAACCU_UUACGAGGC_UAAGA |
| pLK170110v20 | PA1v2-leader-RBS-*gfpmut2*v2-tT7, oriVpSC101, Kmr | UUUGUUUCUAGAACCU_AUUAAGUAC_UAAGA |
| pLK170110v22 | PA1v2-leader-RBS-*gfpmut2*v2-tT7, oriVpSC101, Kmr | UUUGUUUCUAGAACCU_AAUAGUGAG_UAAGA |
| pLK170110v34 | PA1v2-leader-RBS-*gfpmut2*v2-tT7, oriVpSC101, Kmr | UUUGUUUCUAGAACCU_CCAGCGGGG_UAAGA |
| pLK170110v40 | PA1v2-leader-RBS-*gfpmut2*v2-tT7, oriVpSC101, Kmr | UUUGUUUCUAGAACCU_ACCCGGUGG_UAAGA |
| pLK170110v42 | PA1v2-leader-RBS-*gfpmut2*v2-tT7, oriVpSC101, Kmr | UUUGUUUCUAGAACCU_GGCUAGGAG_UAAGA |
| pLK170110v44 | PA1v2-leader-RBS-*gfpmut2*v2-tT7, oriVpSC101, Kmr | UUUGUUUCUAGAACCU_GUCAGGGAG_UAAGA |
| pLK170110v49 | PA1v2-leader-RBS-*gfpmut2*v2-tT7, oriVpSC101, Kmr | UUUGUUUCUAGAACCU_CGACGGGGG_UAAGA |
| pLK170110v59 | PA1v2-leader-RBS-*gfpmut2*v2-tT7, oriVpSC101, Kmr | UUUGUUUCUAGAACCU_GGAGUGAUC_UAAGA |
| pLK170110v68 | PA1v2-leader-RBS-*gfpmut2*v2-tT7, oriVpSC101, Kmr | UUUGUUUCUAGAACCU_GGAGGUGUU_UAAGA |
| pLK170110v69 | PA1v2-leader-RBS-*gfpmut2*v2-tT7, oriVpSC101, Kmr | UUUGUUUCUAGAACCU_AGCAGGGGU_UAAGA |
| pLK170110v71 | PA1v2-leader-RBS-*gfpmut2*v2-tT7, oriVpSC101, Kmr | UUUGUUUCUAGAACCU_AACAGGGGG_UAAGA |
| pLK170110v79 | PA1v2-leader-RBS-*gfpmut2*v2-tT7, oriVpSC101, Kmr | UUUGUUUCUAGAACCU_AUAUAGGAG_UAAGA |
| pLK170518v2 | PA1v2-leader-RBS-*gfpmut2*v2-tT7, oriVpSC101, Kmr | GCUAUCUGGCAAACCCG_AGAGGUAUU_UGAG |
| pLK170518v4 | PA1v2-leader-RBS-*gfpmut2*v2-tT7, oriVpSC101, Kmr | GCUAUCUGGCAAACCCG_UUCGGGGGU_UGAG |
| pLK170523v25 | PA1v2-leader-RBS-*venus*-tT7, oriVpSC101v2, Kmr | UUUGUUUCUAGAACCU_AGAAGUGUU_UAAGA |
| pLK170523v28 | PA1v2-leader-RBS-*venus*-tT7, oriVpSC101v2, Kmr | UUUGUUUCUAGAACCU_CGGGGAAGU_UAAGA |
| pLK170523v31 | PA1v2-leader-RBS-*venus*-tT7, oriVpSC101v2, Kmr | UUUGUUUCUAGAACCU_GAGAGCGUU_UAAGA |
| pLK170523v35 | PA1v2-leader-RBS-*venus*-tT7, oriVpSC101v2, Kmr | UUUGUUUCUAGAACCU_AAAUGUGUC_UAAGA |
| pLK170523v68 | PA1v2-leader-RBS-*venus*-tT7, oriVpSC101v2, Kmr | UUUGUUUCUAGAACCU_UGGAGAUAU_UAAGA |
| pLK170523v69 | PA1v2-leader-RBS-*venus*-tT7, oriVpSC101v2, Kmr | UUUGUUUCUAGAACCU_UAGGAGAUA_UAAGA |
| pLK170523v71 | PA1v2-leader-RBS-*venus*-tT7, oriVpSC101v2, Kmr | UUUGUUUCUAGAACCU_GAGGGAGUU_UAAGA |

aKmr, kanamycin resistance.

bCmr, tetracycline resistance.

coriVpSC101v2, oriVpSC101 bearing the RepA(E93K) mutation.

dPA1v2, the PA1 promoter of phage T7 bearing a spontaneous deletion (∆C) in its spacer region 7-bp upstream of its -10 element.

e*gfpmut2*v2, the *gfpmut2* 5` coding sequence 5`-ATGAGTAAAGGAGAAGAACTT-3` replaced by 5`-ATGTCCAAAGGTGAGGAACTG-3`.

fRBS sequence defined as the 30-nt mRNA sequence immediately upstream of the *gfpmut2* or *venus* reporter genes.

Supplemental Table S3. Spike-in variant list.

| Reporter | Plasmida | SD sequence (5’-3’) | Translation efficiency (Log(FP))b |
| --- | --- | --- | --- |
| GFP | pTK03 | AUUCCUCCA | 0.448 ± 0.041 |
|  | pLK170110v7 | CGCGGGAUA | 0.487 ± 0.041 |
|  | pLK170110v6 | GCUCAGGGU | 0.801 ± 0.070 |
|  | pLK170110v20 | AUUAAGUAC | 1.078 ± 0.037 |
|  | pLK170110v12 | UUACGAGGC | 1.343 ± 0.043 |
|  | pLK170110v22 | AAUAGUGAG | 1.548 ± 0.040 |
|  | pLK170110v34 | CCAGCGGGG | 1.708 ± 0.009 |
|  | pLK170110v40 | ACCCGGUGG | 1.911 ± 0.048 |
|  | pLK170110v44 | GUCAGGGAG | 2.092 ± 0.051 |
|  | pLK170110v49 | CGACGGGGG | 2.300 ± 0.027 |
|  | pLK170110v42 | GGCUAGGAG | 2.385 ± 0.036 |
|  | pLK170110v59 | GGAGUGAUC | 2.441 ± 0.057 |
|  | pLK170110v69 | AGCAGGGGU | 2.598 ± 0.017 |
|  | pLK170110v68 | GGAGGUGUU | 2.607 ± 0.035 |
|  | pYC08 | UAAGGAGGU | 2.861 ± 0.053 |
|  | pLK170110v79 | AUAUAGGAG | 2.879 ± 0.031 |
|  | pTK05 | GAGAGGUAA | 2.968 ± 0.081 |
|  | pLK170110v71 | AACAGGGGG | 3.015 ± 0.022 |
| YFP | pTK06 | AUUCCUCCA | 0.654 ± 0.023 |
|  | pLK170523v25 | AGAAGUGUU | 1.053 ± 0.042 |
|  | pLK170523v35 | AAAUGUGUC | 1.204 ± 0.072 |
|  | pLK170523v28 | CGGGGAAGU | 1.212 ± 0.031 |
|  | pLK170523v31 | GAGAGCGUU | 1.505 ± 0.027 |
|  | pHC202v | AUAGGAGCA | 1.777 ± 0.056 |
|  | pLK170523v71 | GAGGGAGUU | 1.925 ± 0.033 |
|  | pLK170523v68 | UGGAGAUAU | 2.054 ± 0.061 |
|  | pLK170523v69 | UAGGAGAUA | 2.394 ± 0.041 |
|  | pHC198v | AUAGGAGGA | 2.670 ± 0.045 |
|  | pHC199v | UAAGGAGGU | 2.804 ± 0.065 |

aAll plasmids bear the RBS*arti* context.

bThe translation efficiency is reported in terms of cellular GFP or YFP expression. Data are reported as the means and stand deviations of the geometric means of 50,000 cells in three independent measurements.

Supplemental Table S4. Spike-in linear regression equations.

| Library | Replicate | Spike-in linear regression equation  (*y = ax + b*)a | | |
| --- | --- | --- | --- | --- |
| *a* | *b* | R2 |
| FL*fepB* | 1 | 0.4105 | -0.1850 | 0.9889 |
|  | 2 | 0.4152 | -0.1794 | 0.9915 |
|  | 3b | 0.2273 | -0.0357 | 0.9904 |
| FL*arti* | 1 | 0.4171 | -0.1746 | 0.9932 |
|  | 2 | 0.4491 | -0.4194 | 0.9935 |
|  | 3 | 0.4436 | -0.3435 | 0.9950 |
| FL*dmsC* | 1 | 0.4542 | -0.4283 | 0.9619 |
|  | 2 | 0.3911 | -0.1196 | 0.9957 |
|  | 3 | 0.4023 | -0.1156 | 0.9668 |
| FL*arti*-Y | 1 | 0.3294 | 0.0607 | 0.9943 |

a*x*, rank mean; *y*, fitness; *a*, slope; *b*, y-axis intercept

bThis sort-seq experiment divided the GFP fluorescence spectrum into 15 ranks; the remaining experiments divided the GFP or YFP fluorescence spectrum into 8 ranks.

**Supplemental File S1. (separate file)**

Quality and quantity of fluorescence-activated cell sorting and deep sequencing.

**Supplemental File S2. (separate file)**

Fitness (Log(GFP)) of genotypes in FL*fepB* quantified by three replicates of sort-seq. In each replicate, only variants with read counts ≥ 25 are considered.

**Supplemental File S3. (separate file)**

Fitness (Log(GFP)) of genotypes in FL*arti* quantified by three replicates of sort-seq. In each replicate, only variants with read counts ≥ 25 are considered.

**Supplemental File S4. (separate file)**

Fitness (Log(GFP)) of genotypes in FL*dmsC* quantified by three replicates of sort-seq. In each replicate, only variants with read counts ≥ 25 are considered.

**Supplemental File S5. (separate file)**

Fitness (Log(YFP)) of genotypes in FL*arti*-Y quantified by sort-seq. Only variants with read counts ≥ 25 are considered.

**Supplemental File S6. (separate file)**

Scripts for data analysis.
